# Supplementary material for: Identification of an Orally Bioavailable, Brain-Penetrant Compound with Selectivity for the Cannabinoid Type 2 Receptor
Source: MDPI journal article supplement (doi:10.3390/molecules27020509), 2022-01-14
Supplement: s1 [file s1]

## Supplementary Information

| Page Number | Figure                             |
|-------------|------------------------------------|
| SI1         | $^1\text{H}$ NMR spectrum of 4a    |
| SI2         | $^{13}\text{C}$ NMR spectrum of 4a |
| SI3         | $^1\text{H}$ NMR spectrum of 4b    |
| SI4         | Dept-135 NMR spectrum of 4b        |
| SI5         | $^1\text{H}$ NMR spectrum of 4c    |
| SI6         | $^{13}\text{C}$ NMR spectrum of 4c |
| SI7         | $^1\text{H}$ NMR spectrum of 4d    |
| SI8         | $^{13}\text{C}$ NMR spectrum of 4d |
| SI9         | $^1\text{H}$ NMR spectrum of 4e    |
| SI10        | Dept-135 NMR spectrum of 4e        |
| SI11        | $^1\text{H}$ NMR spectrum of 4f    |
| SI12        | $^{13}\text{C}$ NMR spectrum of 4f |
| SI13        | $^1\text{H}$ NMR spectrum of 4g    |
| SI14        | $^{13}\text{C}$ NMR spectrum of 4g |
| SI15        | $^1\text{H}$ NMR spectrum of 4h    |

## Supplementary Information

| Page Number | Figure                             |
|-------------|------------------------------------|
| SI16        | $^{13}\text{C}$ NMR spectrum of 4h |
| SI17        | $^1\text{H}$ NMR spectrum of 4i    |
| SI18        | $^{13}\text{C}$ NMR spectrum of 4i |
| SI19        | $^1\text{H}$ NMR spectrum of 4j    |
| SI20        | $^{13}\text{C}$ NMR spectrum of 4j |
| SI21        | $^1\text{H}$ NMR spectrum of 4k    |
| SI22        | $^{13}\text{C}$ NMR spectrum of 4k |
| SI23        | $^1\text{H}$ NMR spectrum of 4l    |
| SI24        | $^{13}\text{C}$ NMR spectrum of 4l |
| SI25        | $^1\text{H}$ NMR spectrum of 4m    |
| SI26        | $^{13}\text{C}$ NMR spectrum of 4m |
| SI27        | $^1\text{H}$ NMR spectrum of 4n    |
| SI28        | $^{13}\text{C}$ NMR spectrum of 4n |
| SI29        | $^1\text{H}$ NMR spectrum of 4o    |
| SI30        | $^{13}\text{C}$ NMR spectrum of 4o |

| Page Number | Figure                                                                                                                   |
|-------------|--------------------------------------------------------------------------------------------------------------------------|
| SI31        | $^1\text{H}$ NMR spectrum of 4p                                                                                          |
| SI32        | $^{13}\text{C}$ NMR spectrum of 4p                                                                                       |
| SI33        | $^1\text{H}$ NMR spectrum of 4q                                                                                          |
| SI34        | $^{13}\text{C}$ NMR spectrum of 4q                                                                                       |
| SI35        | Dept-135 NMR spectrum of 4q                                                                                              |
| SI36        | Typical MRM chromatograms of <b>4k</b> (top panel) and the IS (below panel) at 0.5 h plasma pharmacokinetic study sample |
| SI37        | Typical MRM chromatograms of <b>4k</b> (top panel) and the IS (below panel) at 0.5 h brain pharmacokinetic study sample  |
| SI38        | Typical MRM chromatograms of <b>4k</b> (top panel) and the IS (below panel) at 0.5 h kidney pharmacokinetic study sample |
| SI39        | Typical MRM chromatograms of <b>4k</b> (top panel) and the IS (below panel) at 0.5 h liver pharmacokinetic study sample  |

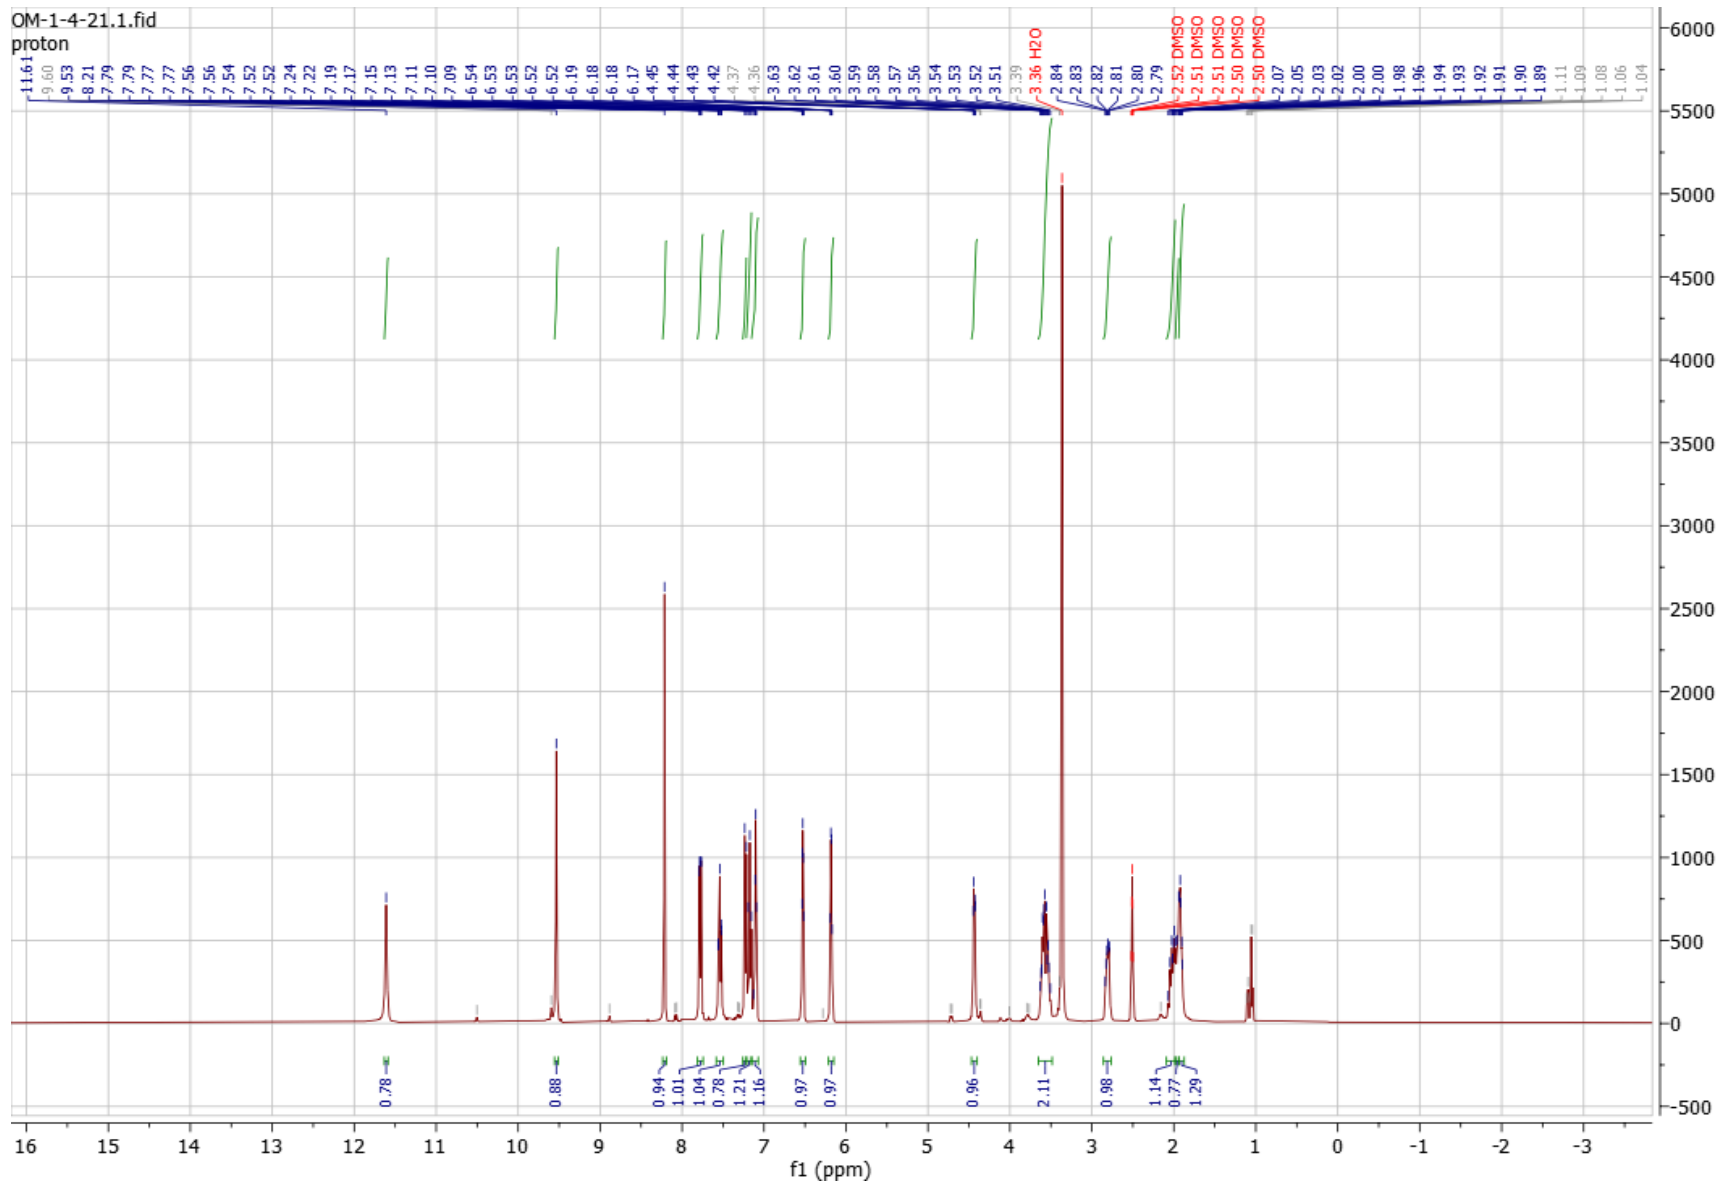

SI 1:  $^1\text{H}$  NMR spectrum of 4a [400 MHz,  $\text{DMSO}-d_6$ ]

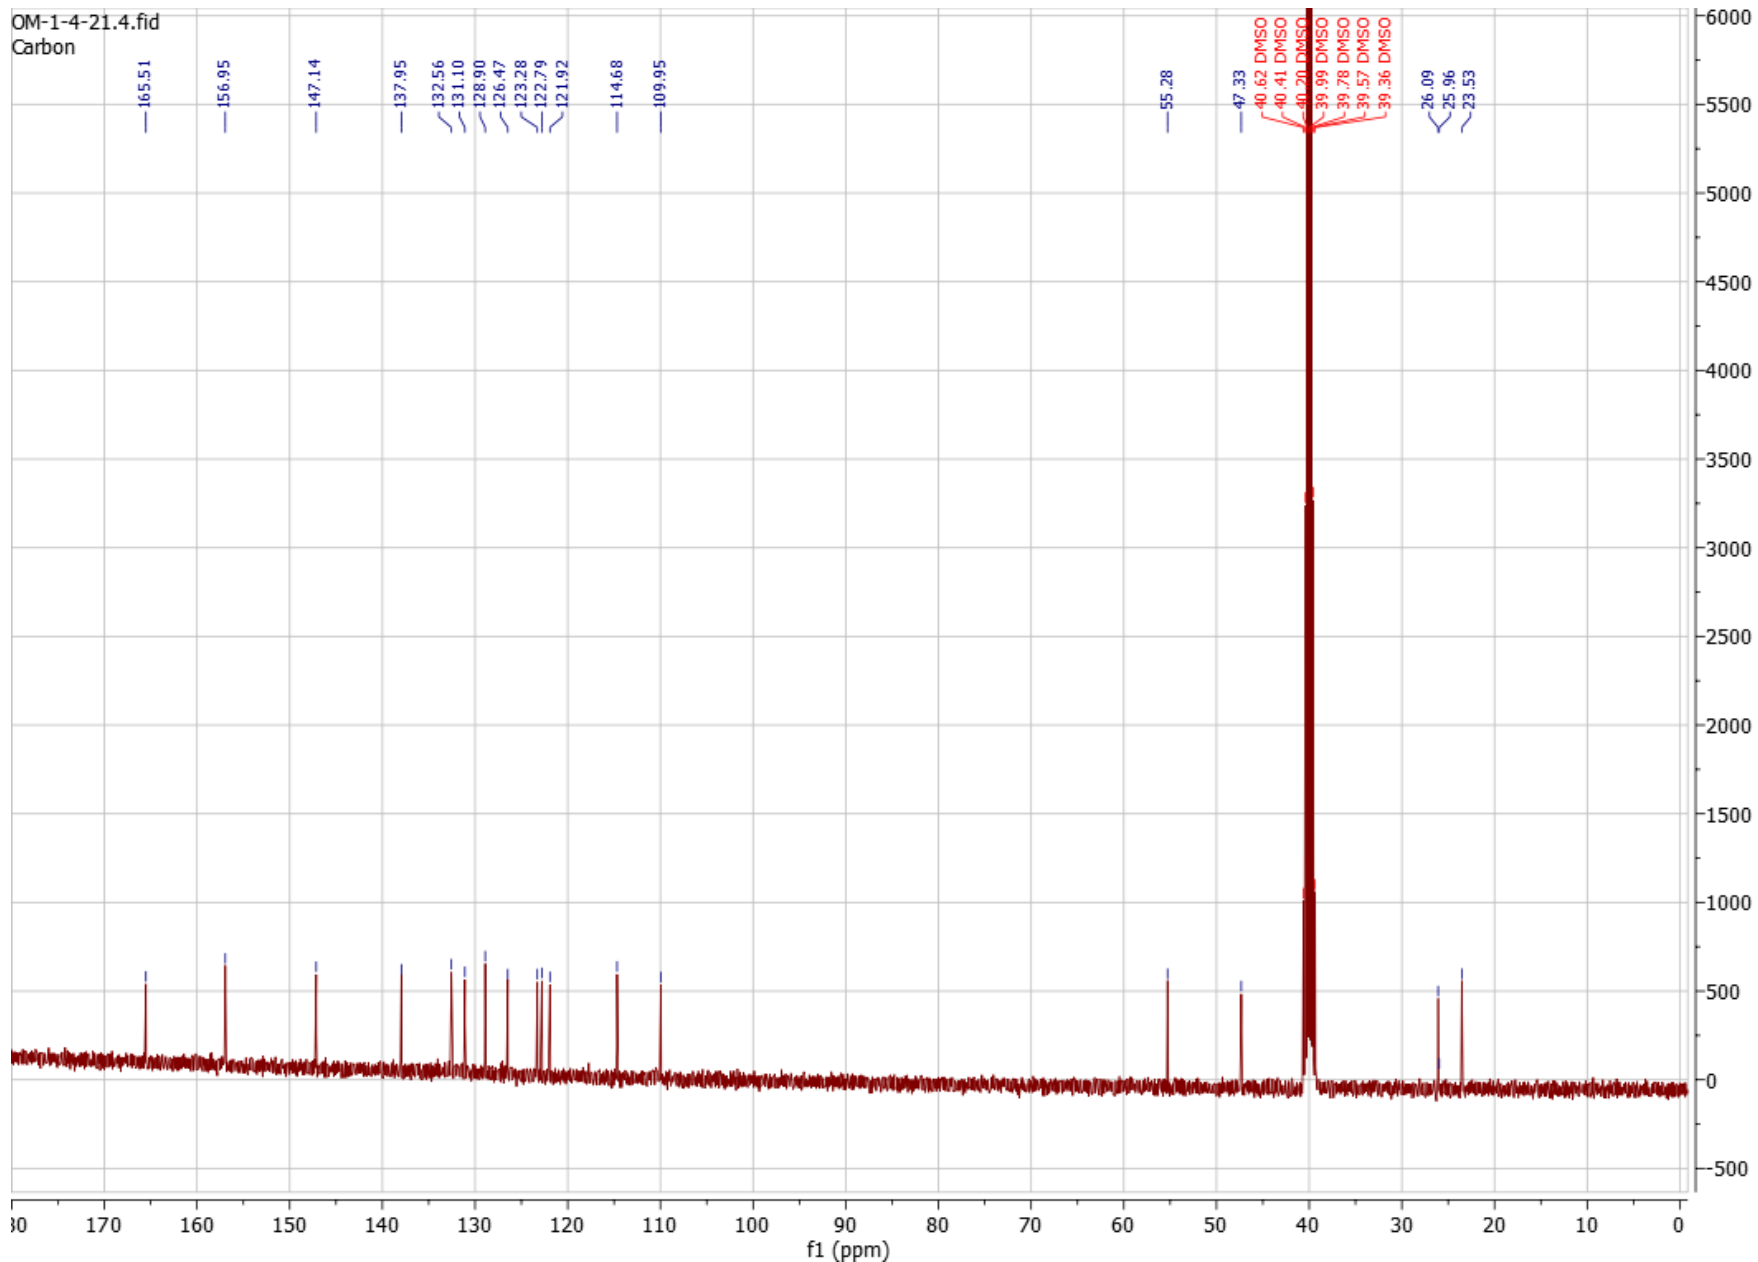

SI 2:  $^{13}\text{C}$  NMR spectrum of 4 a [100 MHz,  $\text{DMSO}-d_6$ ]

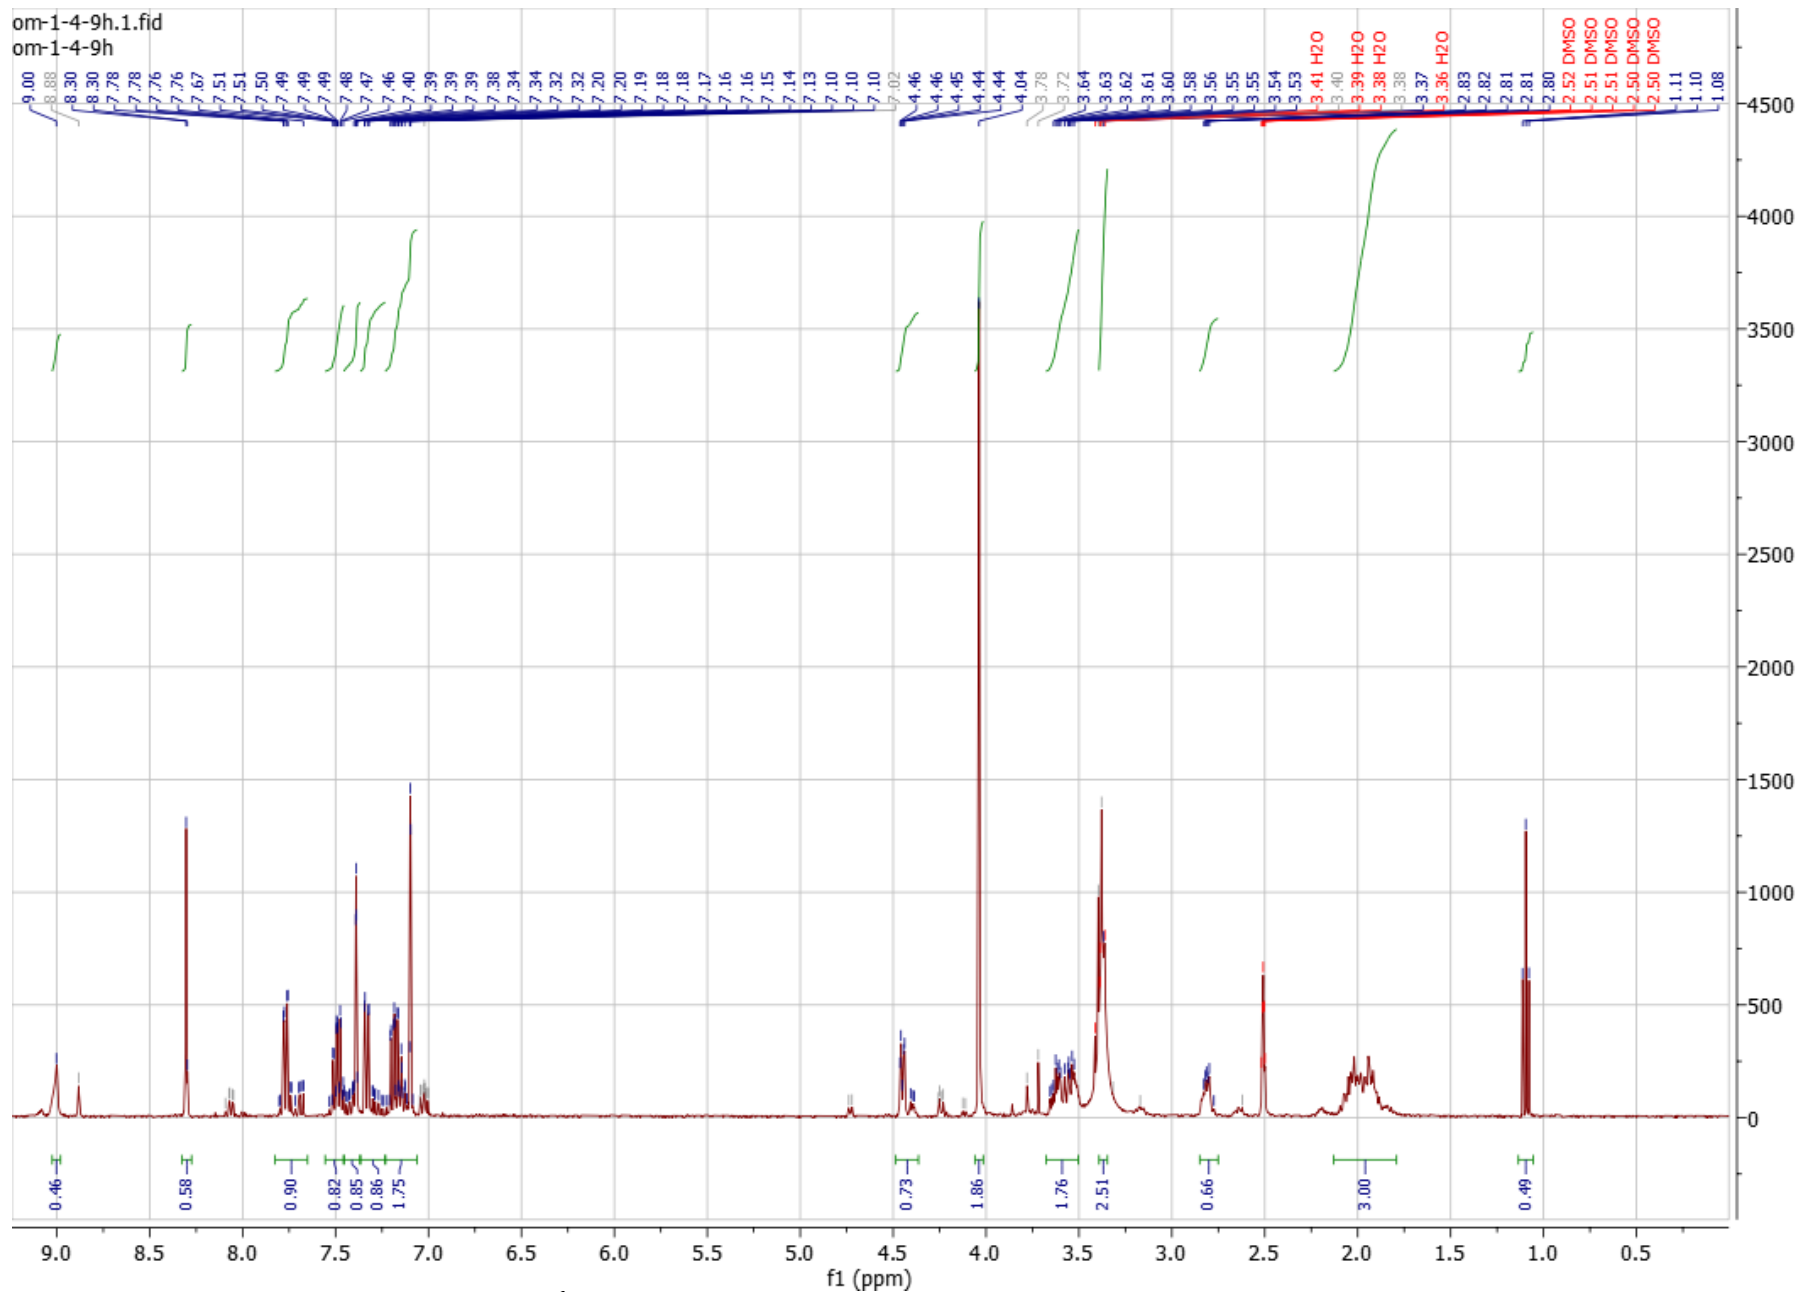

SI 3:  $^1\text{H}$  NMR spectrum of 4b [400 MHz,  $\text{DMSO-}d_6$ ]

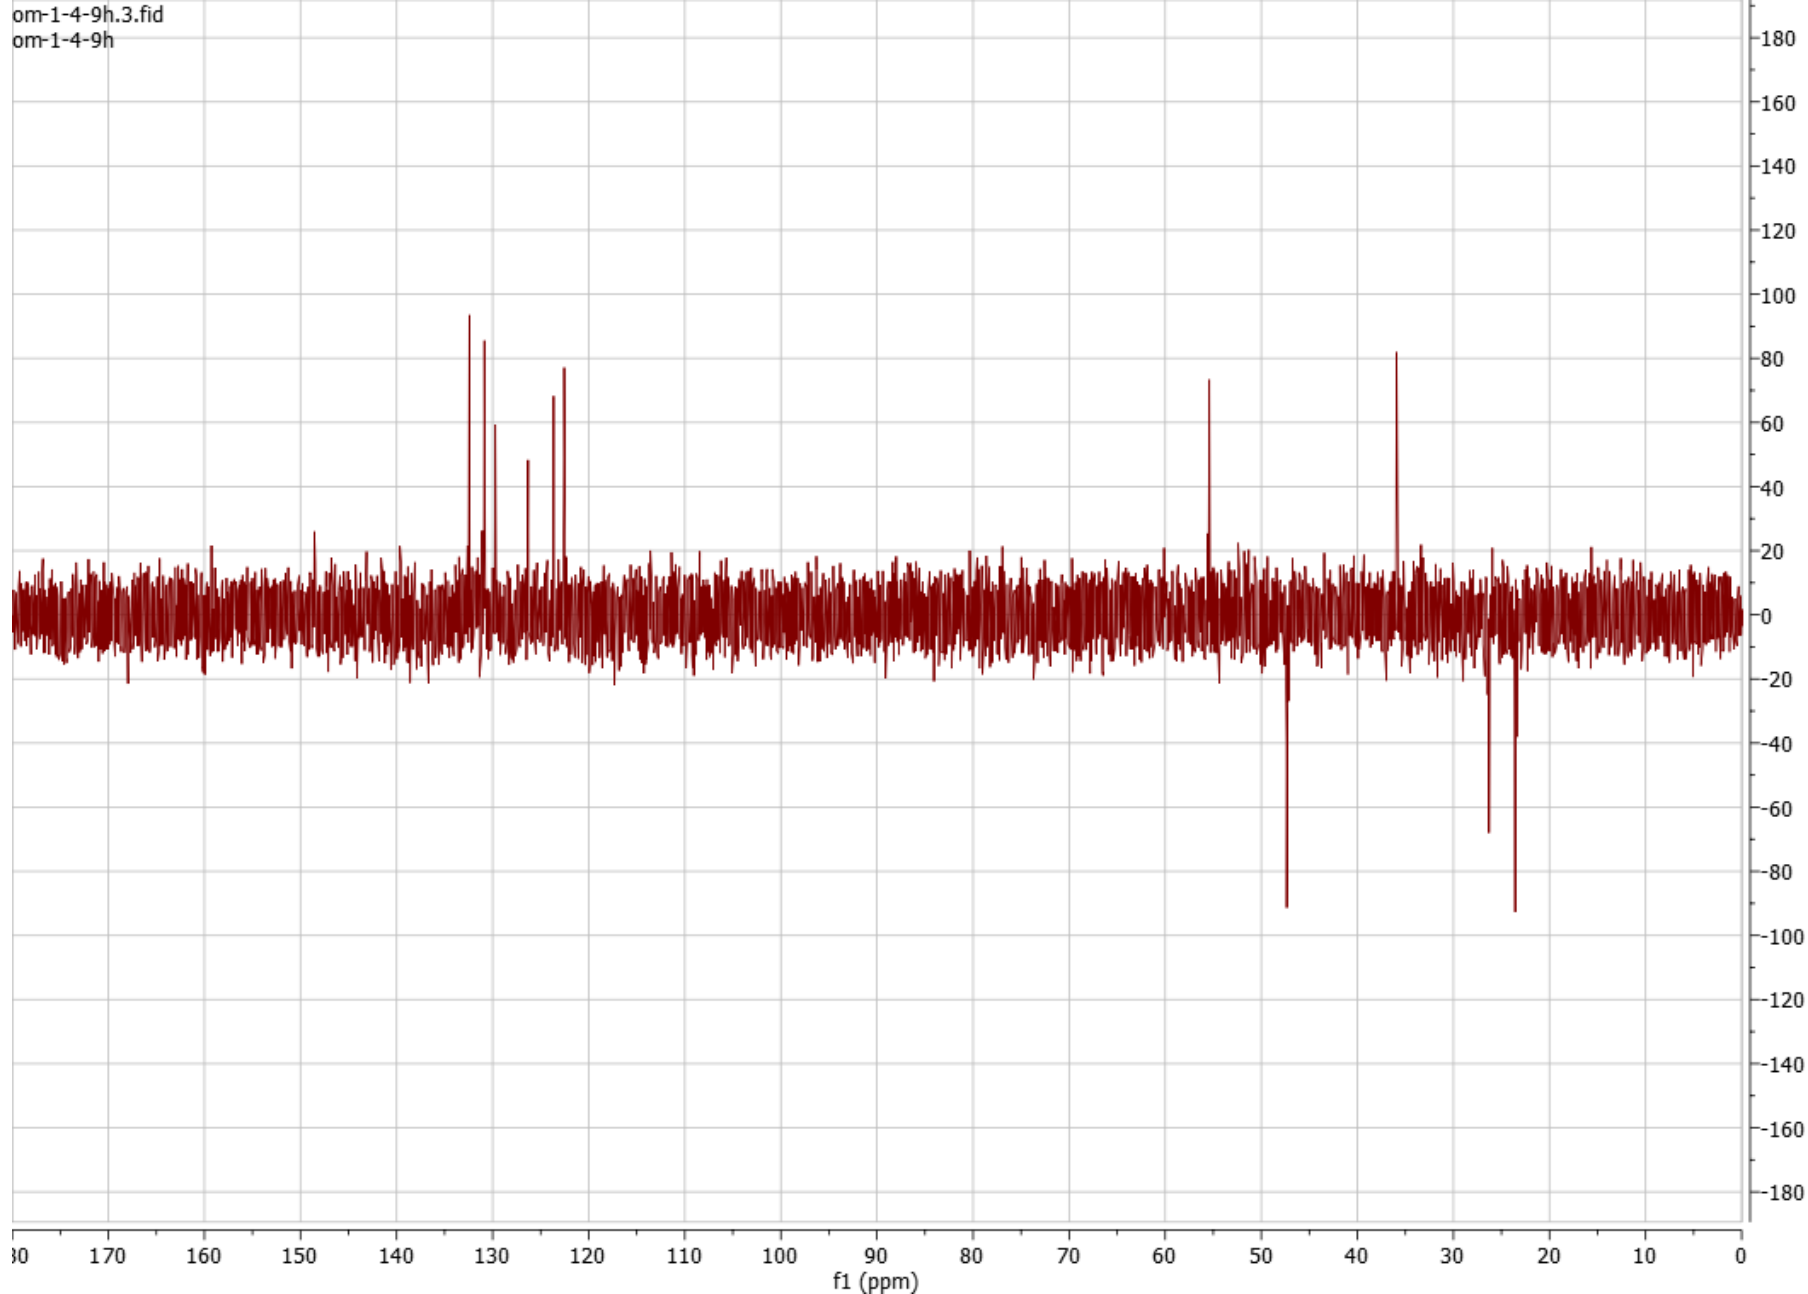

**SI 4:** DEPT-135 spectrum of 4b [100 MHz, DMSO-*d*6]

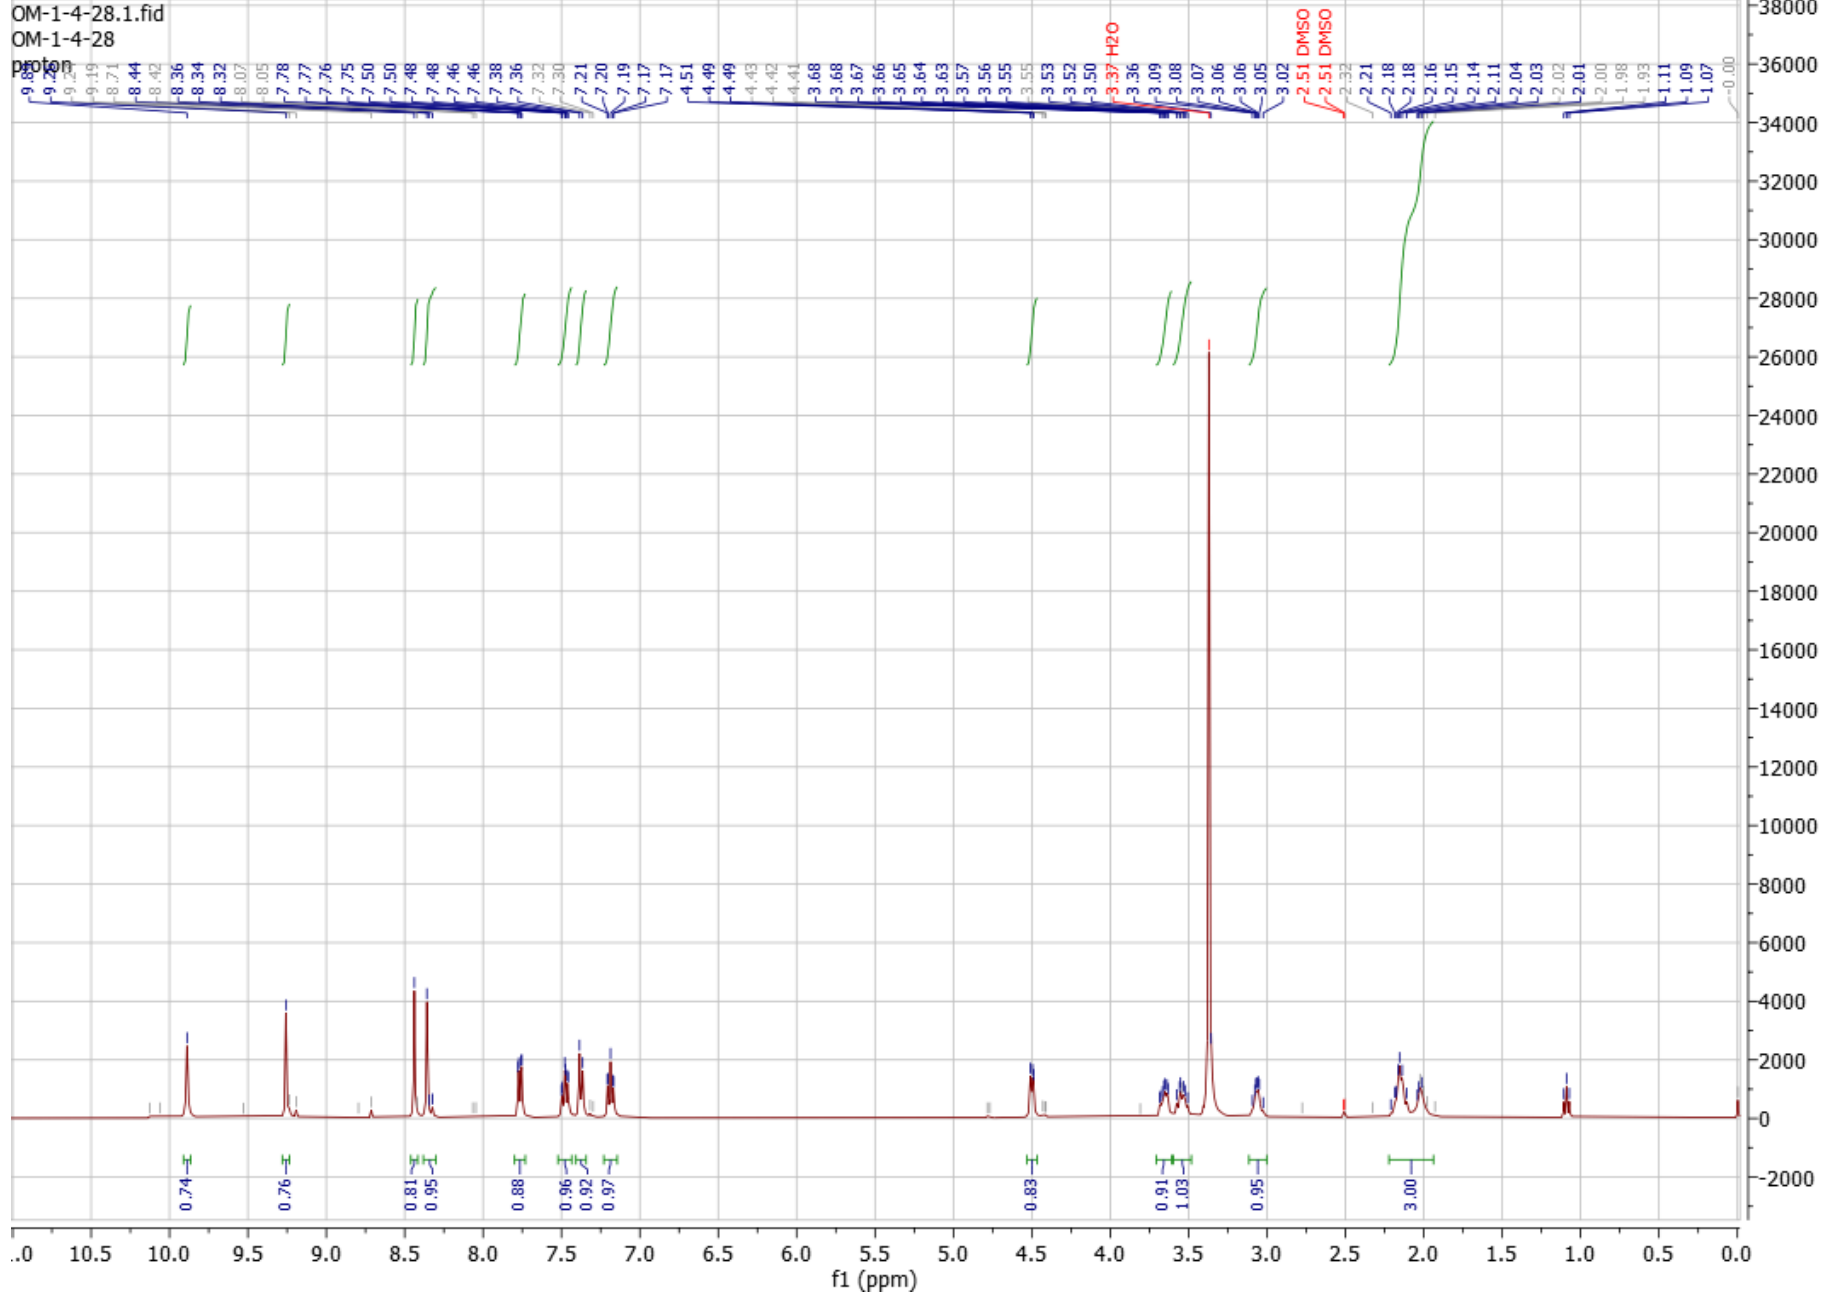

SI 5:  $^1\text{H}$  NMR spectrum of 4c [400 MHz,  $\text{DMSO-}d_6$ ]



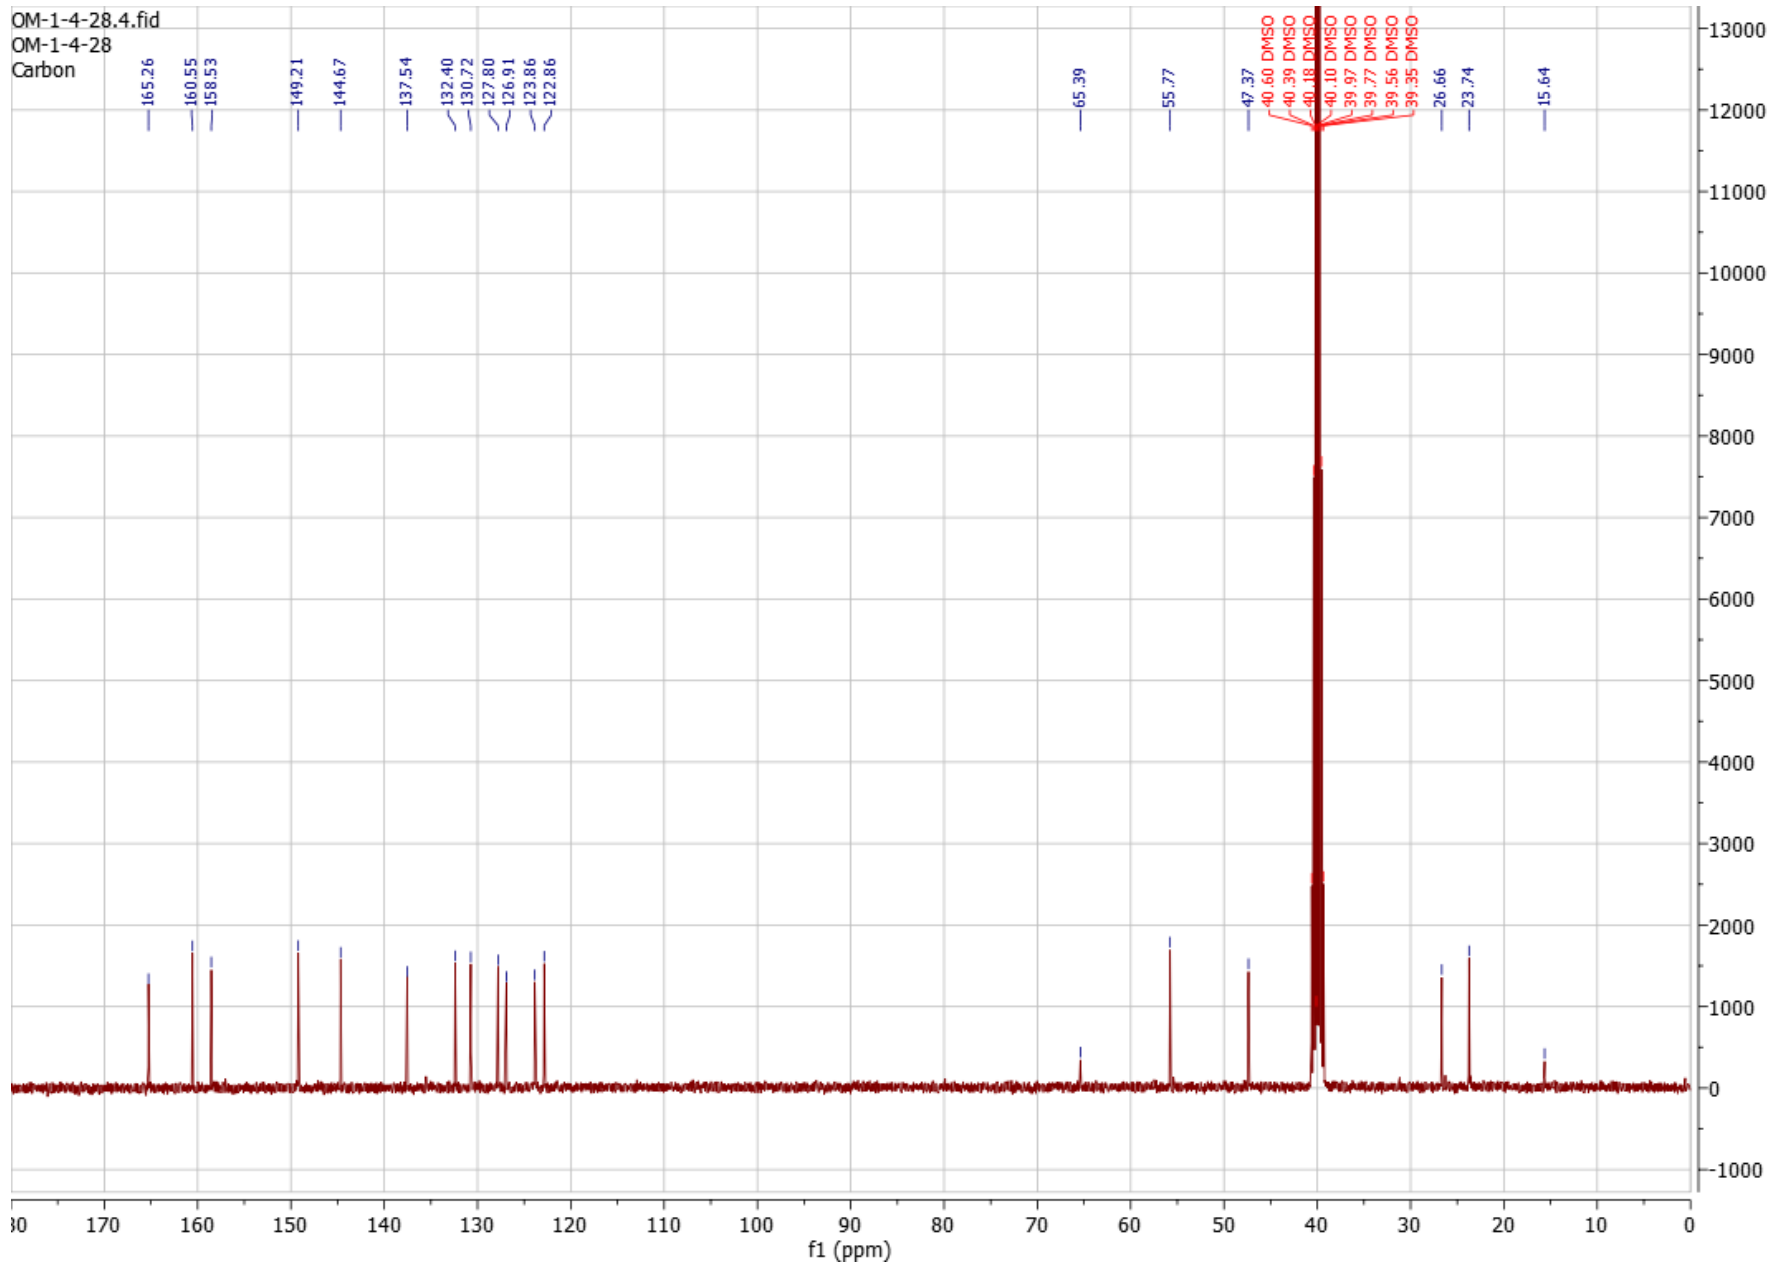

**SI 6:**  $^{13}\text{C}$  NMR spectrum of 4c [400 MHz,  $\text{DMSO-}d_6$ ]

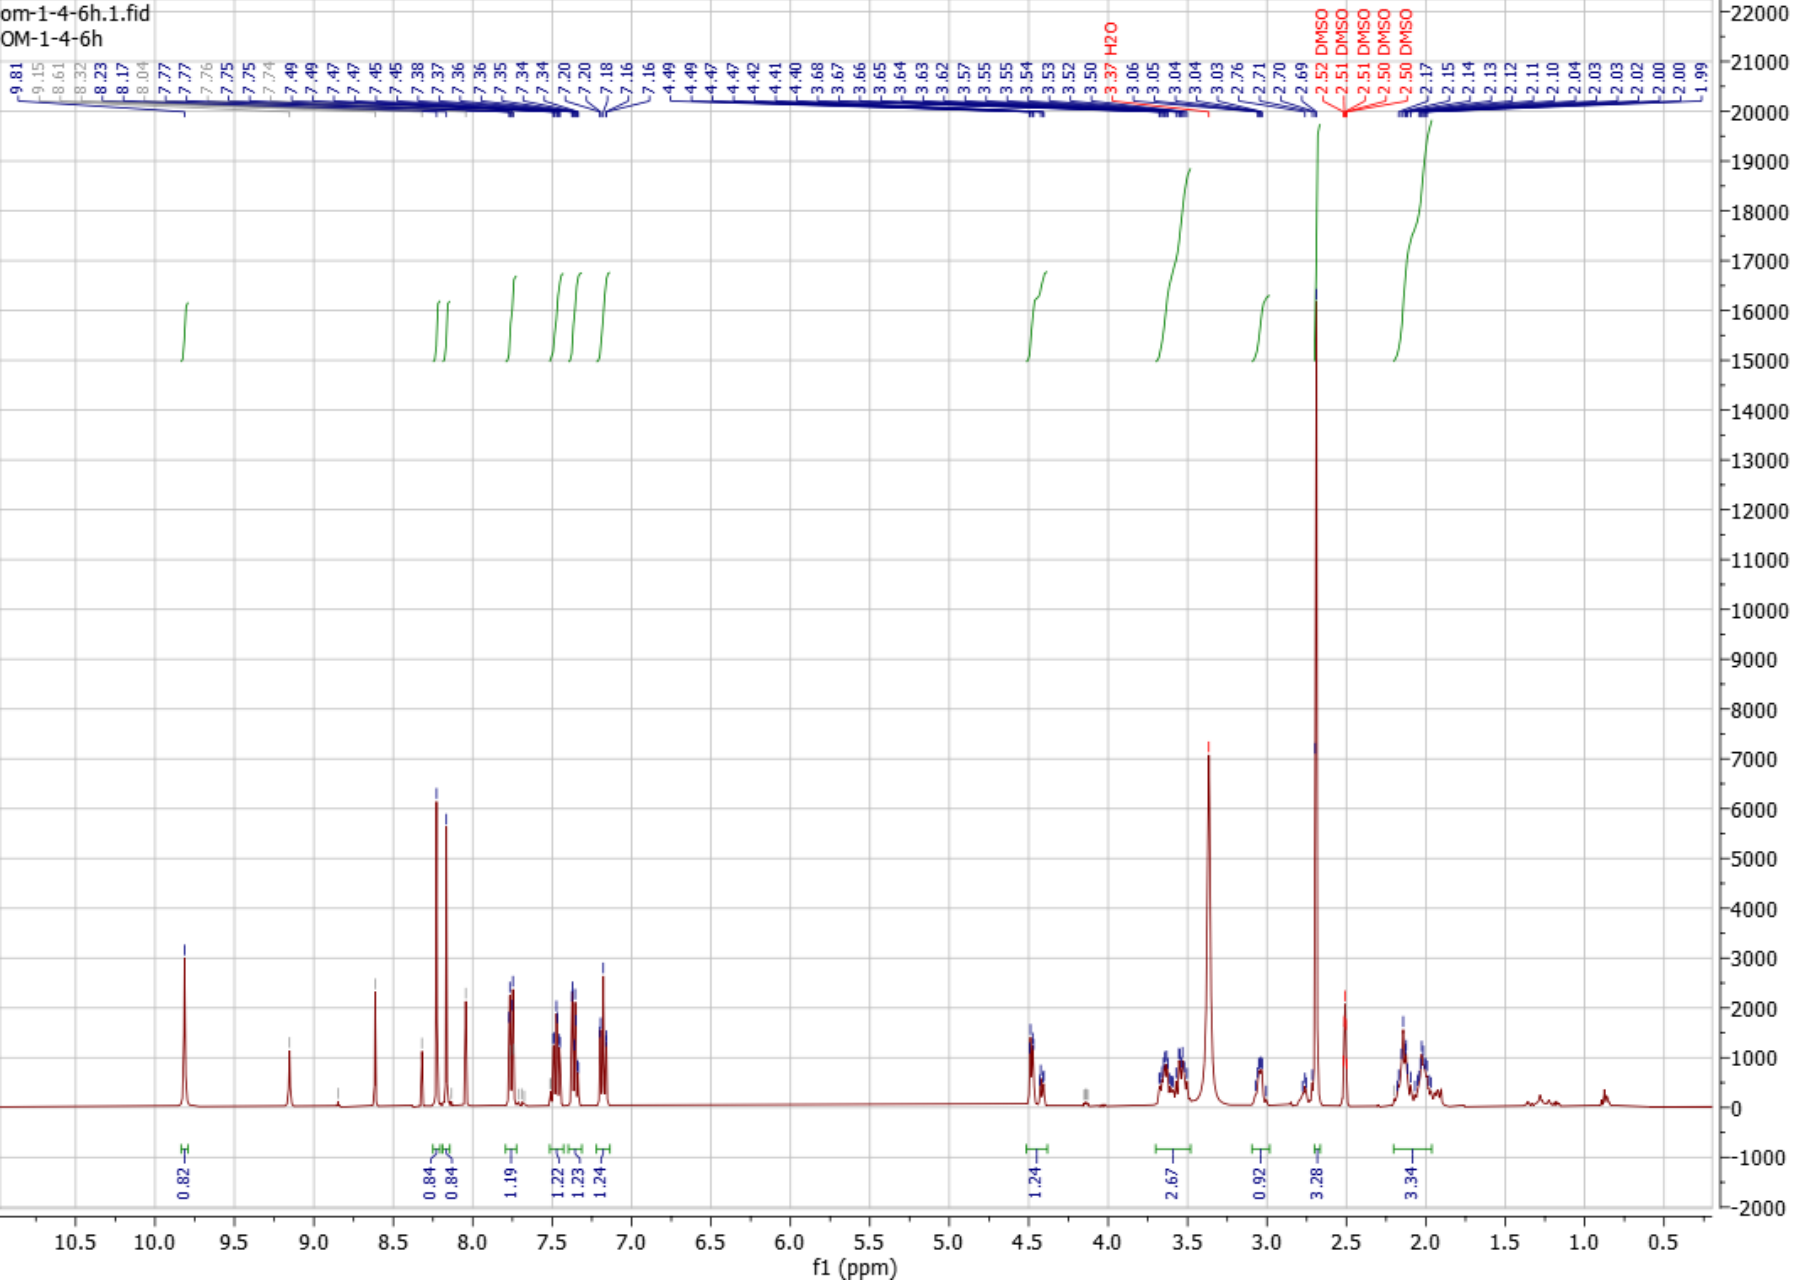

SI 7:  $^1\text{H}$  NMR spectrum of 4d [400 MHz,  $\text{DMSO}-d_6$ ]

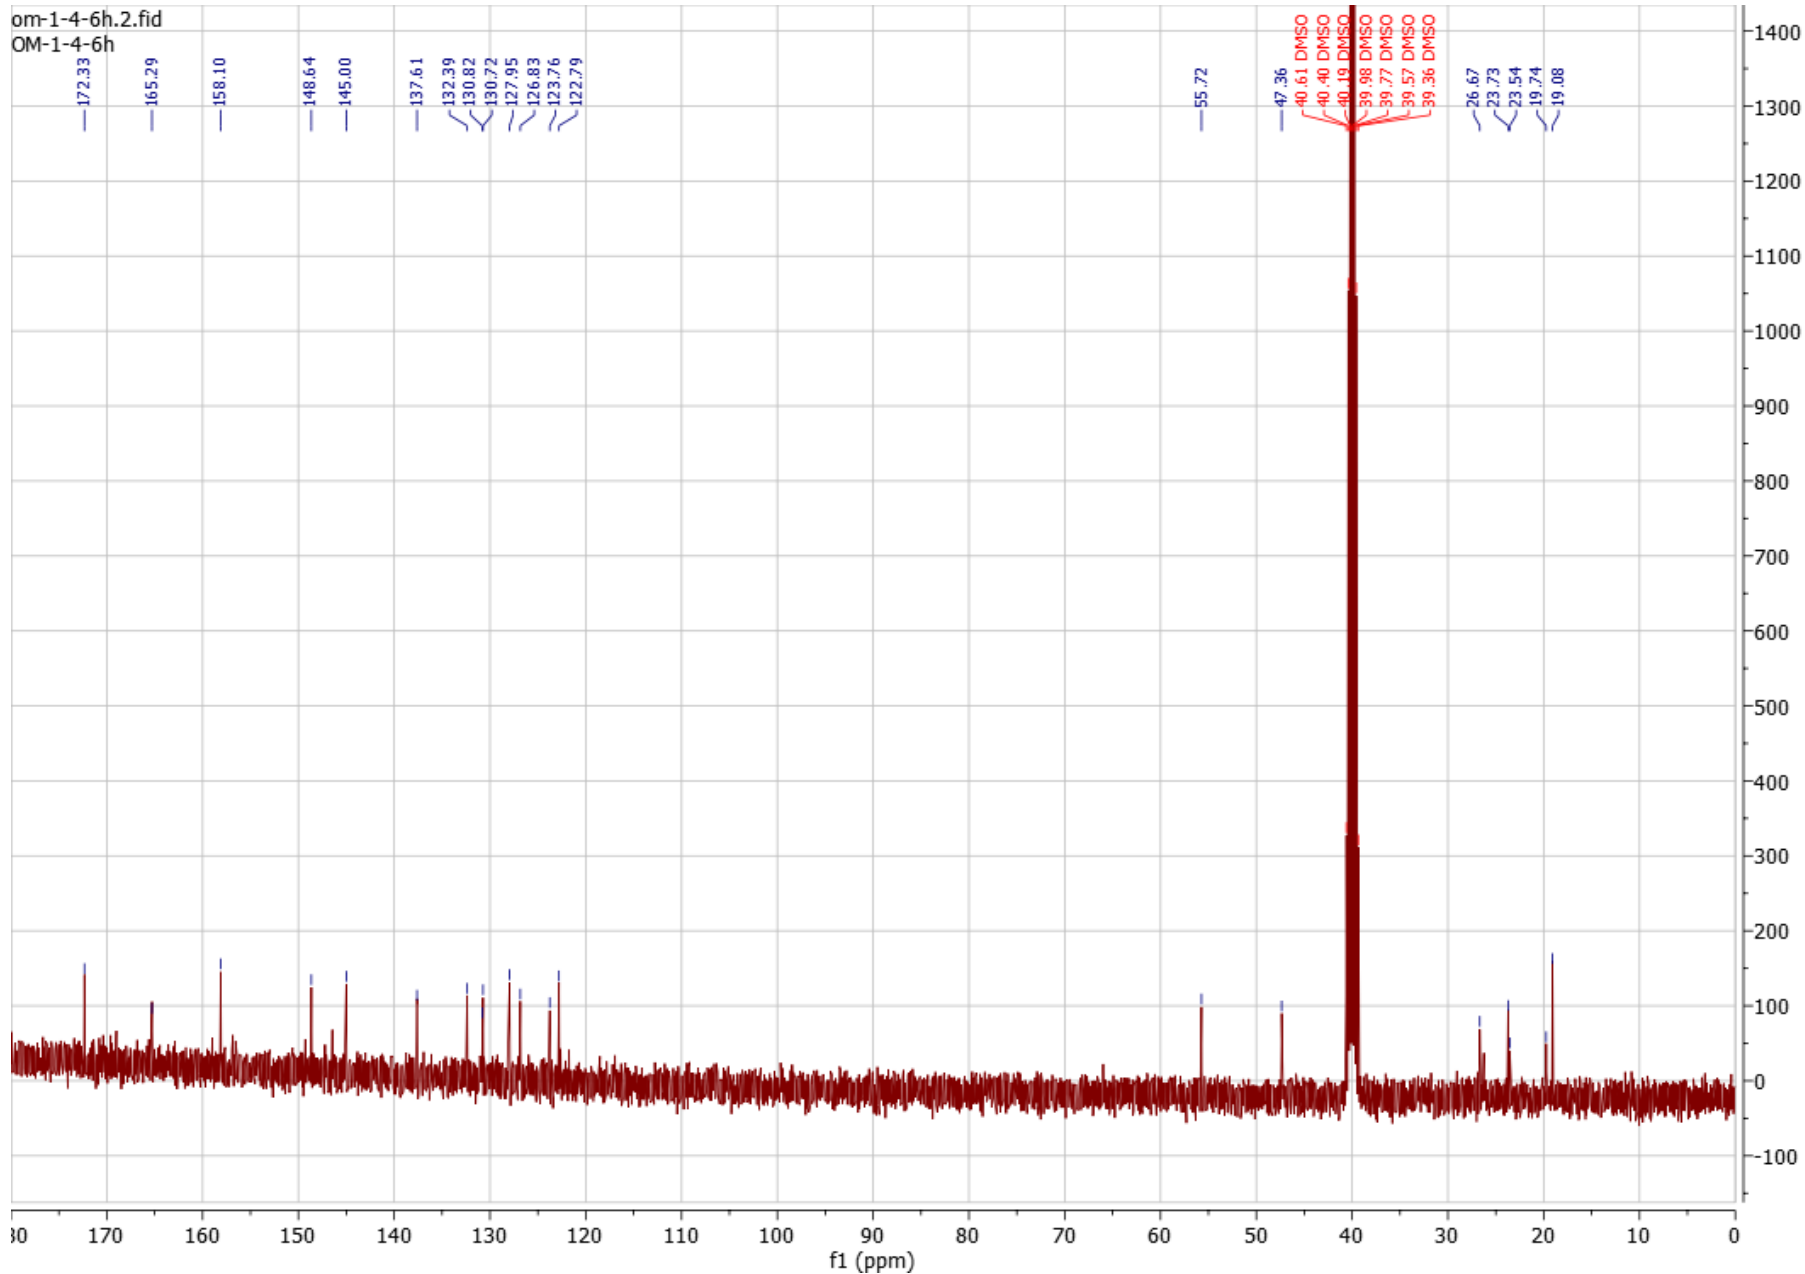

SI 8:  $^{13}\text{C}$  NMR spectrum of 4 d [400 MHz,  $\text{DMSO-}d_6$ ]

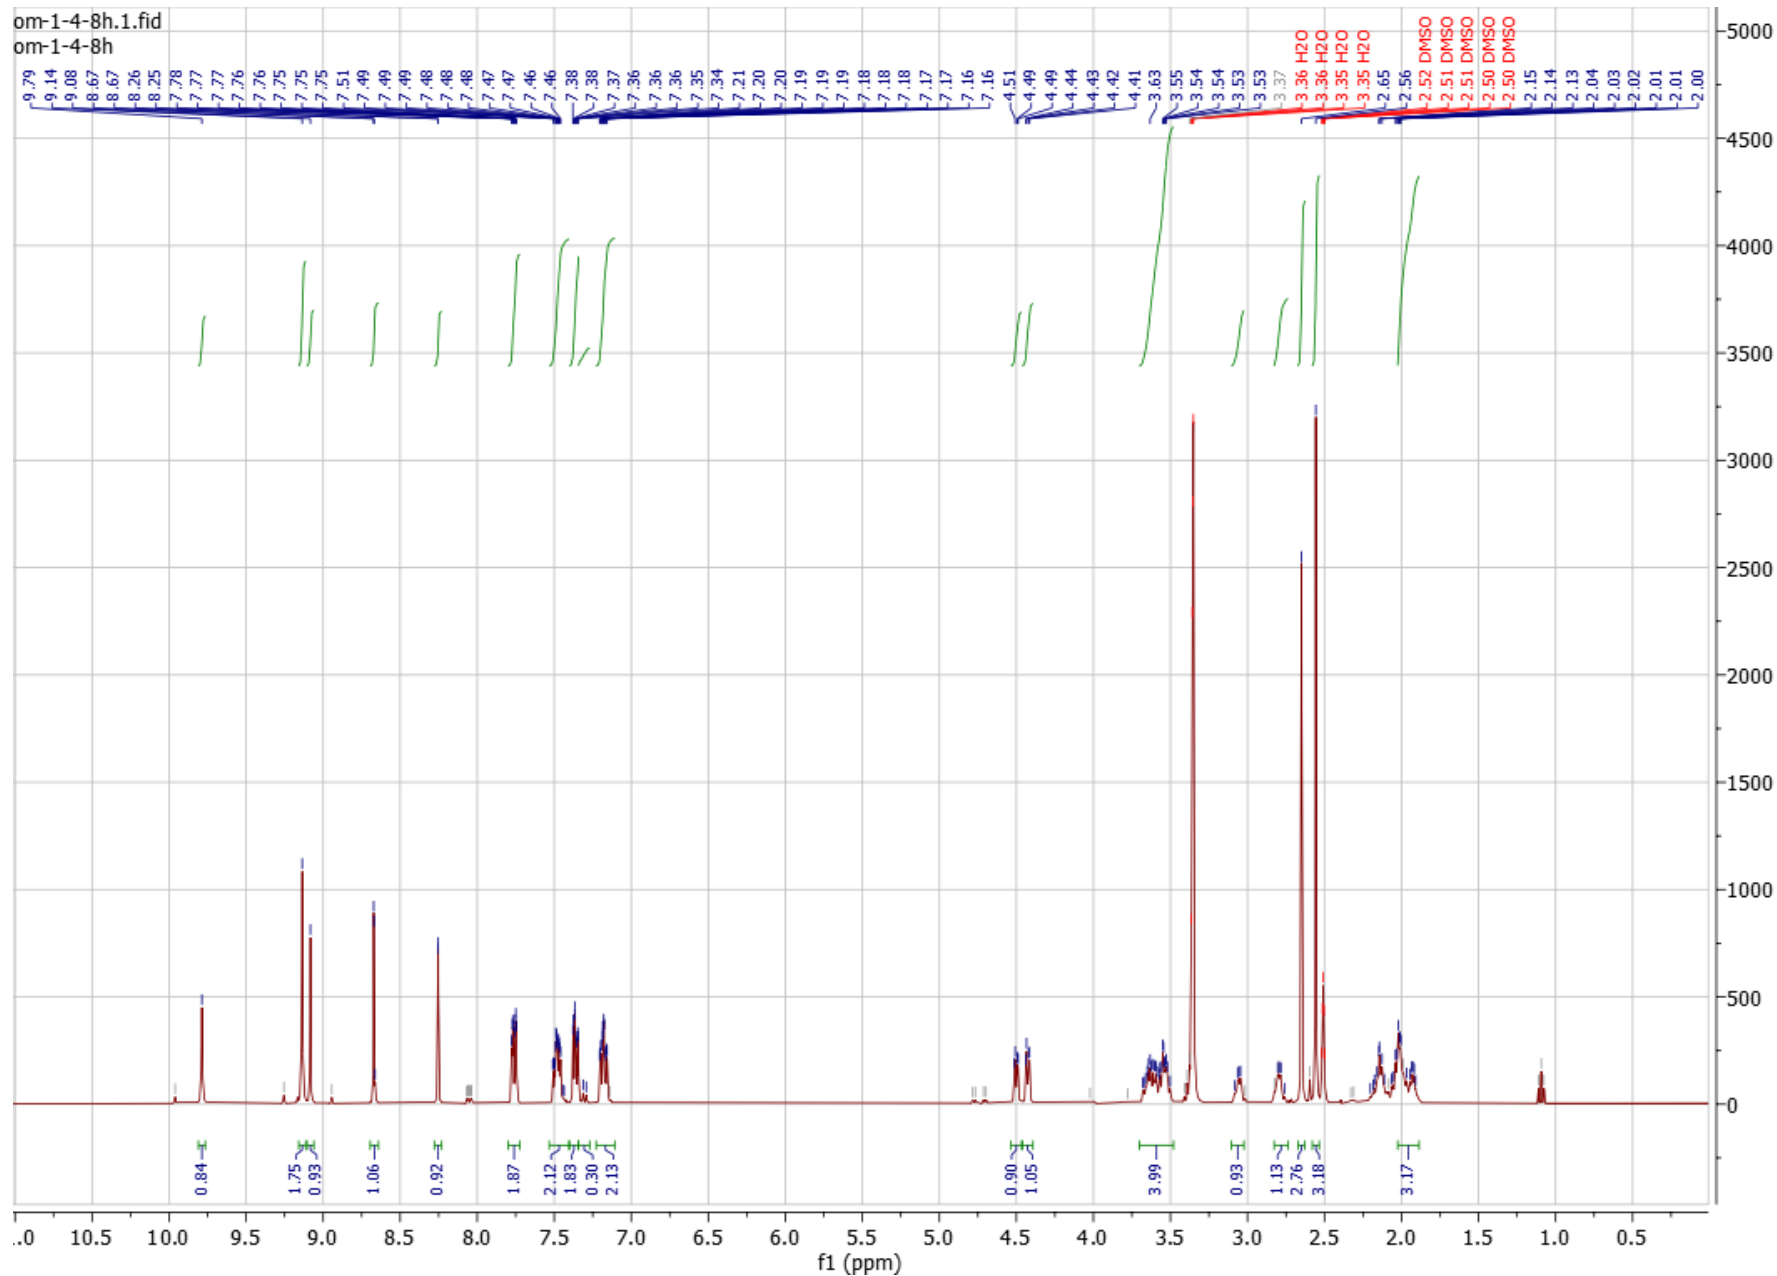

**SI 9:** <sup>1</sup>H NMR spectrum of 4e [400 MHz, DMSO-*d*<sub>6</sub>]

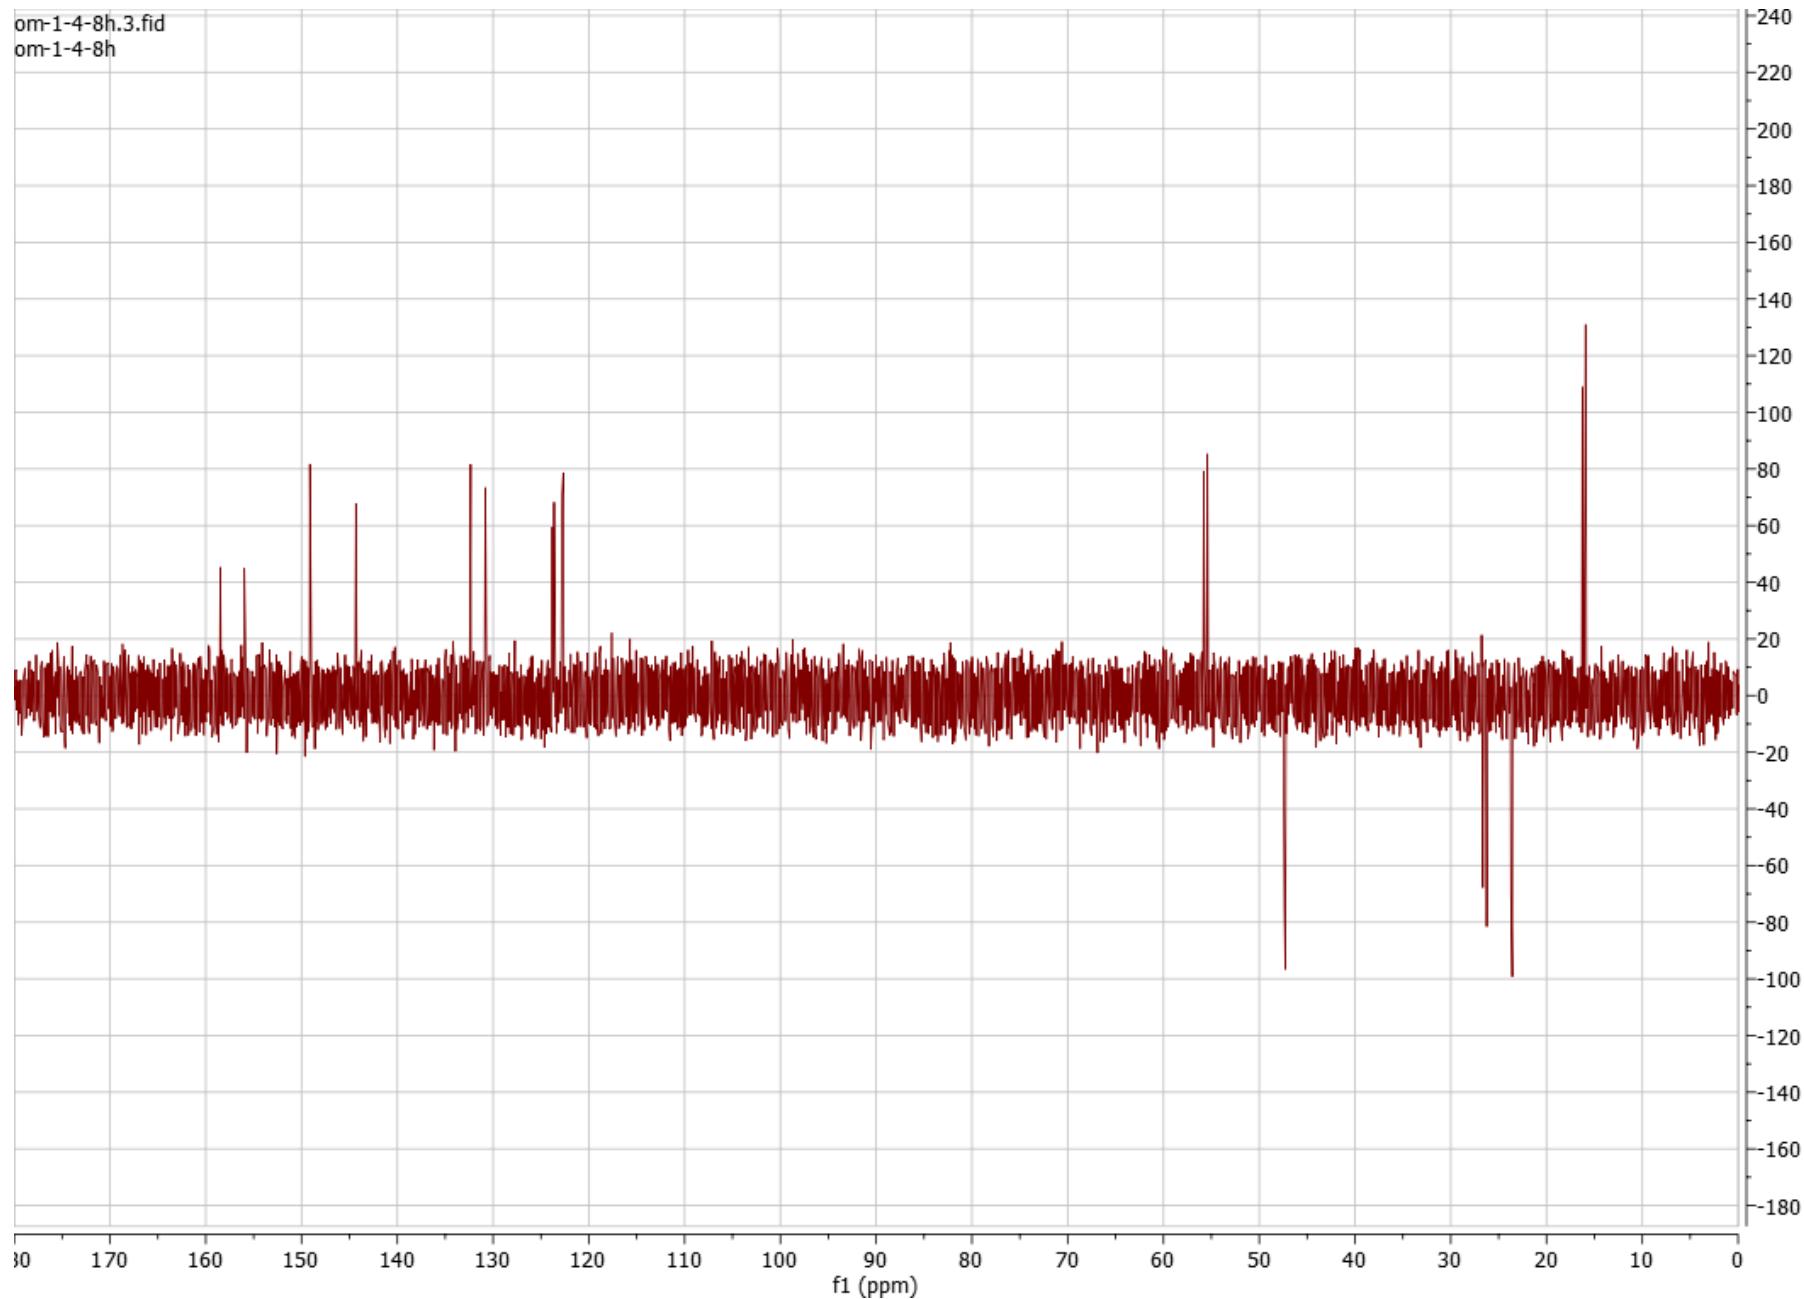

**SI 10:** Dept-135 NMR spectrum of 4 e [100 MHz, DMSO-*d*6]



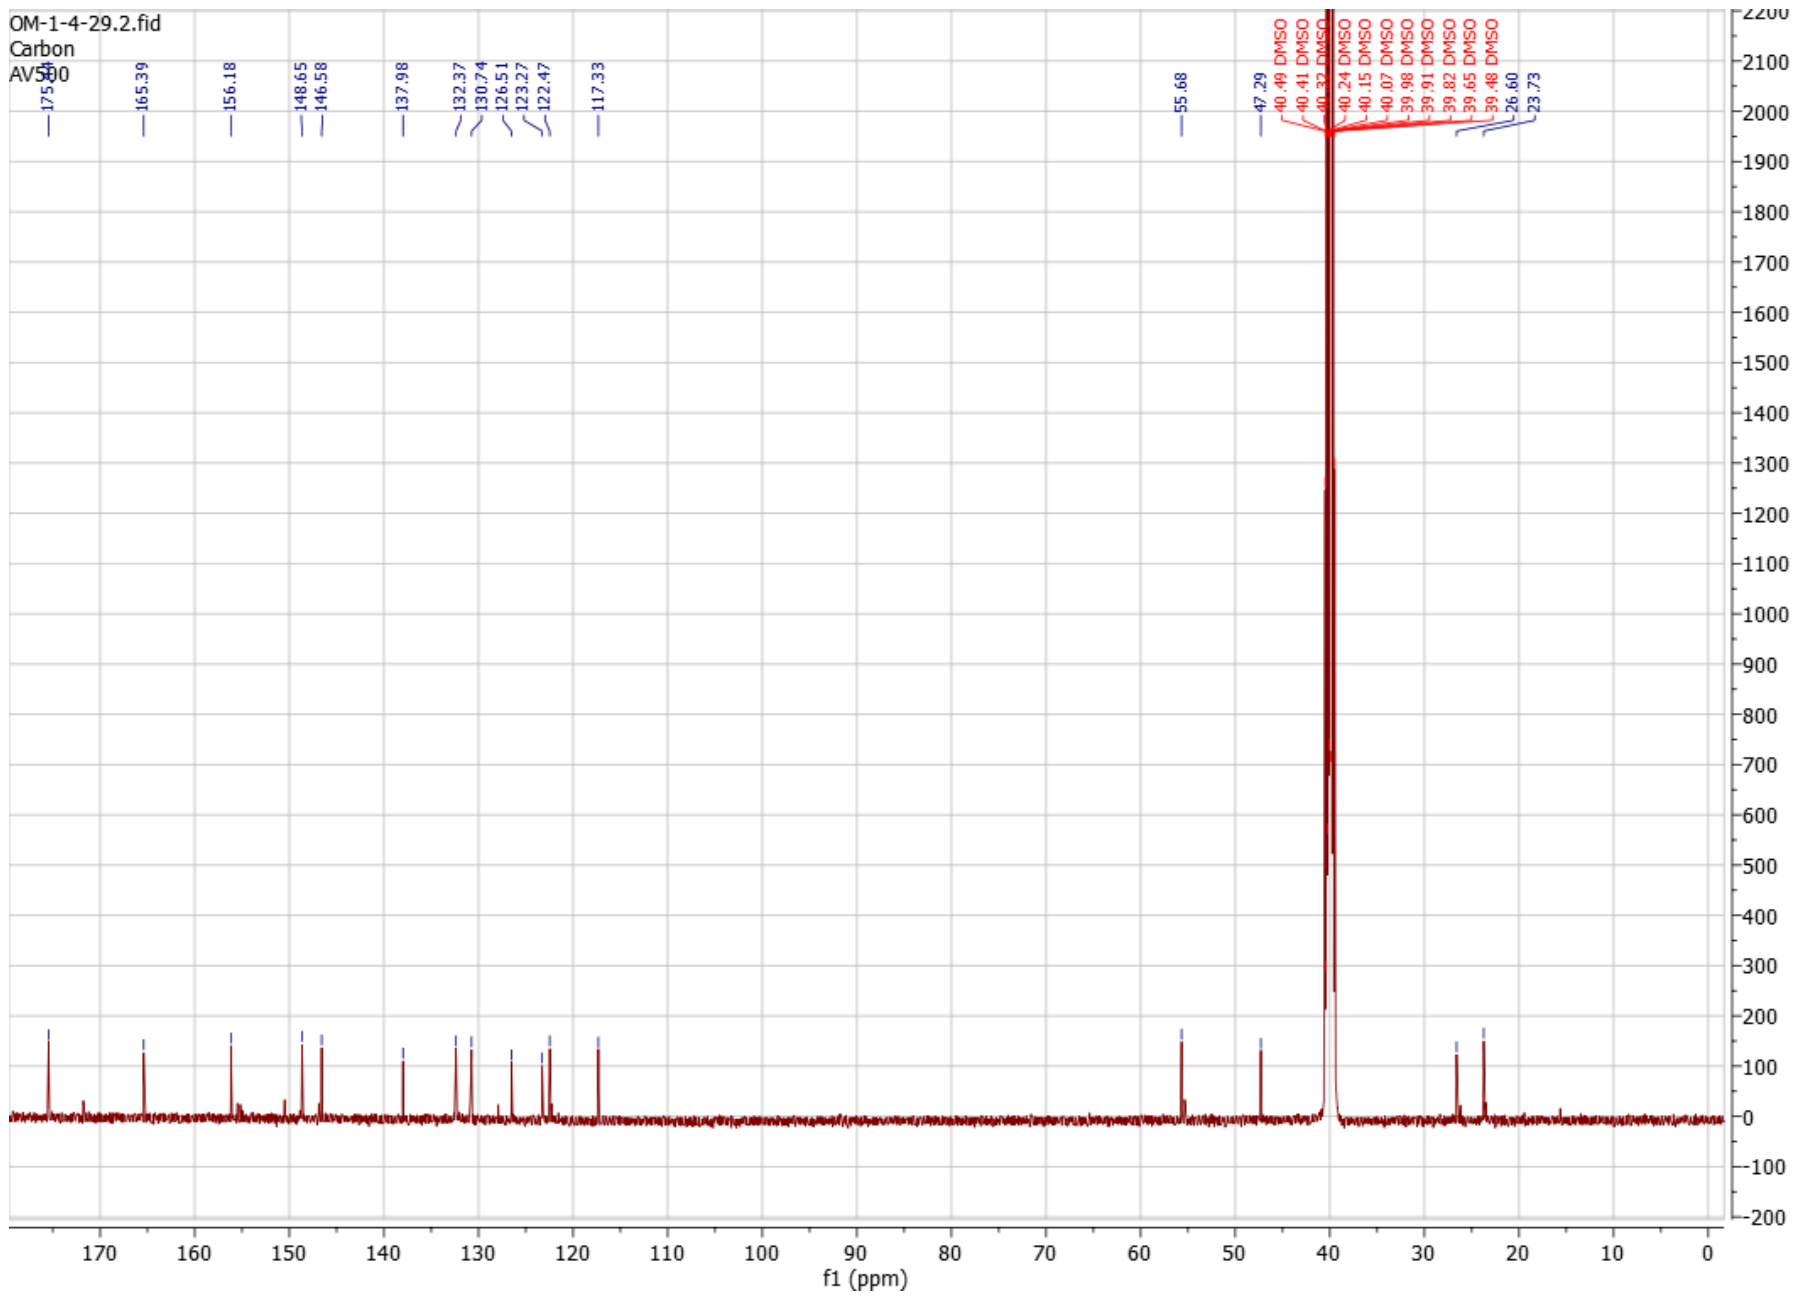

SI 12:  $^{13}\text{C}$  NMR spectrum of 4f [125 MHz, DMSO- $d_6$ ]

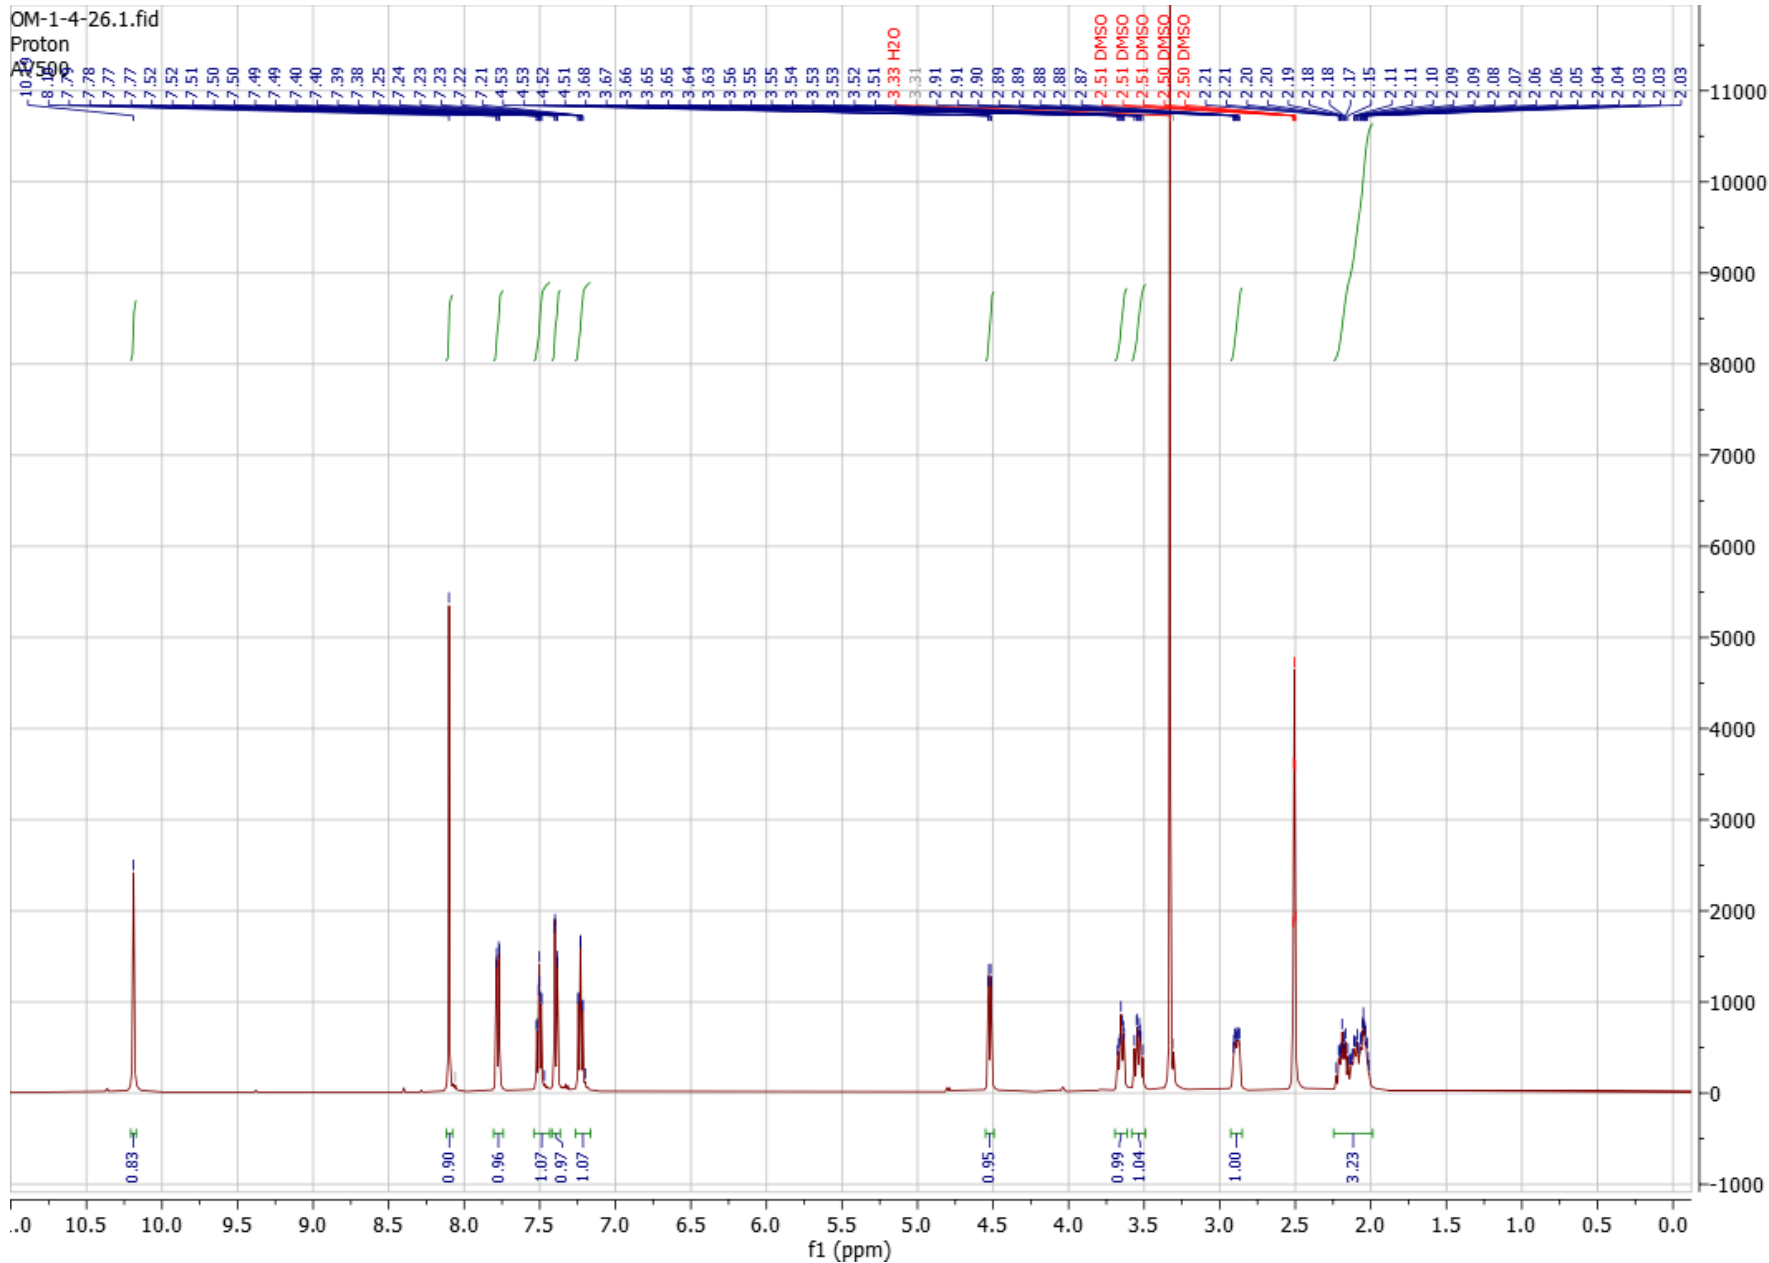

SI 13:  $^1\text{H}$  NMR spectrum of 4g [500 MHz,  $\text{DMSO-}d_6$ ]



OM-1-4-26.2.fid  
Carbon  
AV500

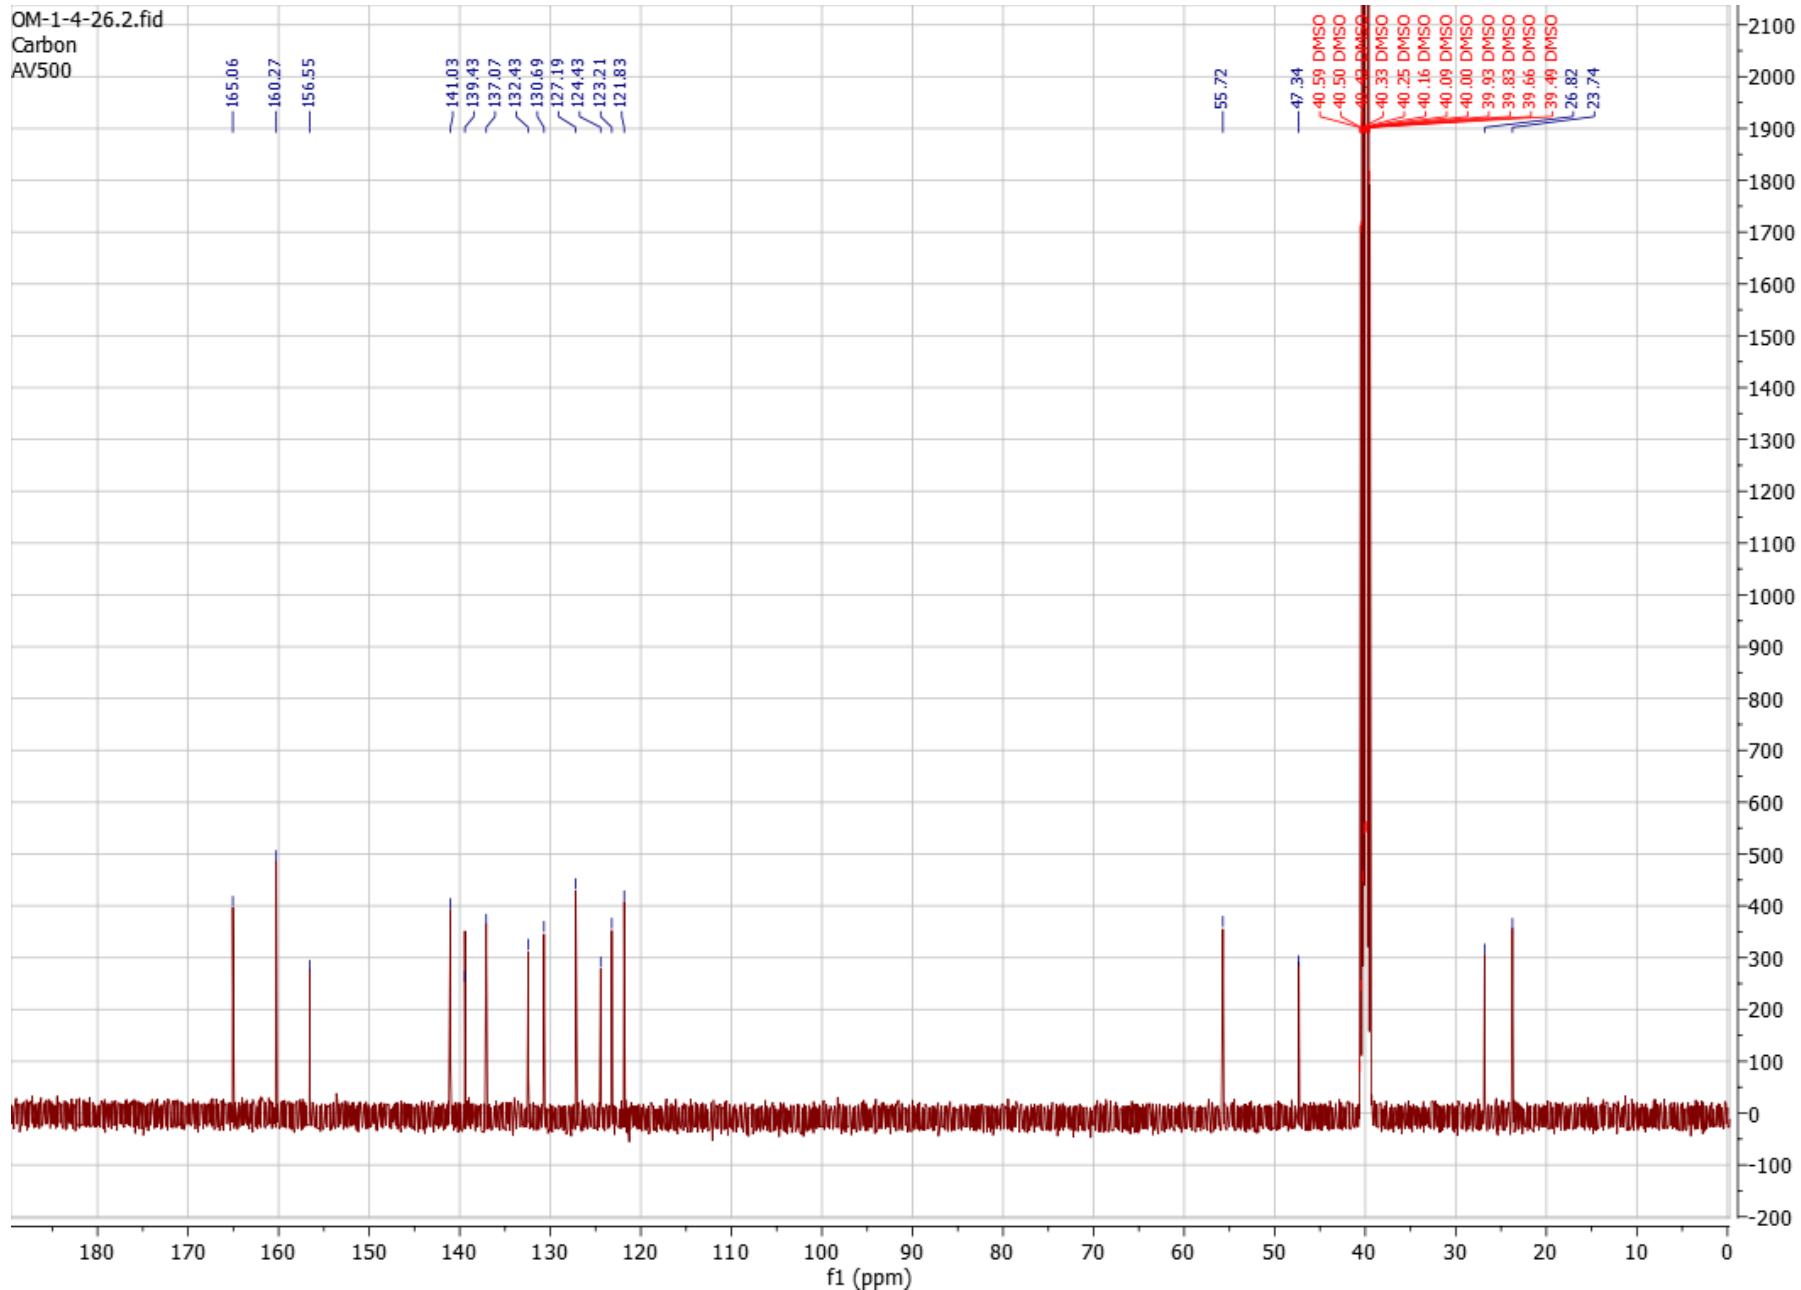

SI 14: <sup>13</sup>C NMR spectrum of 4g [125 MHz, DMSO-*d*<sub>6</sub>]

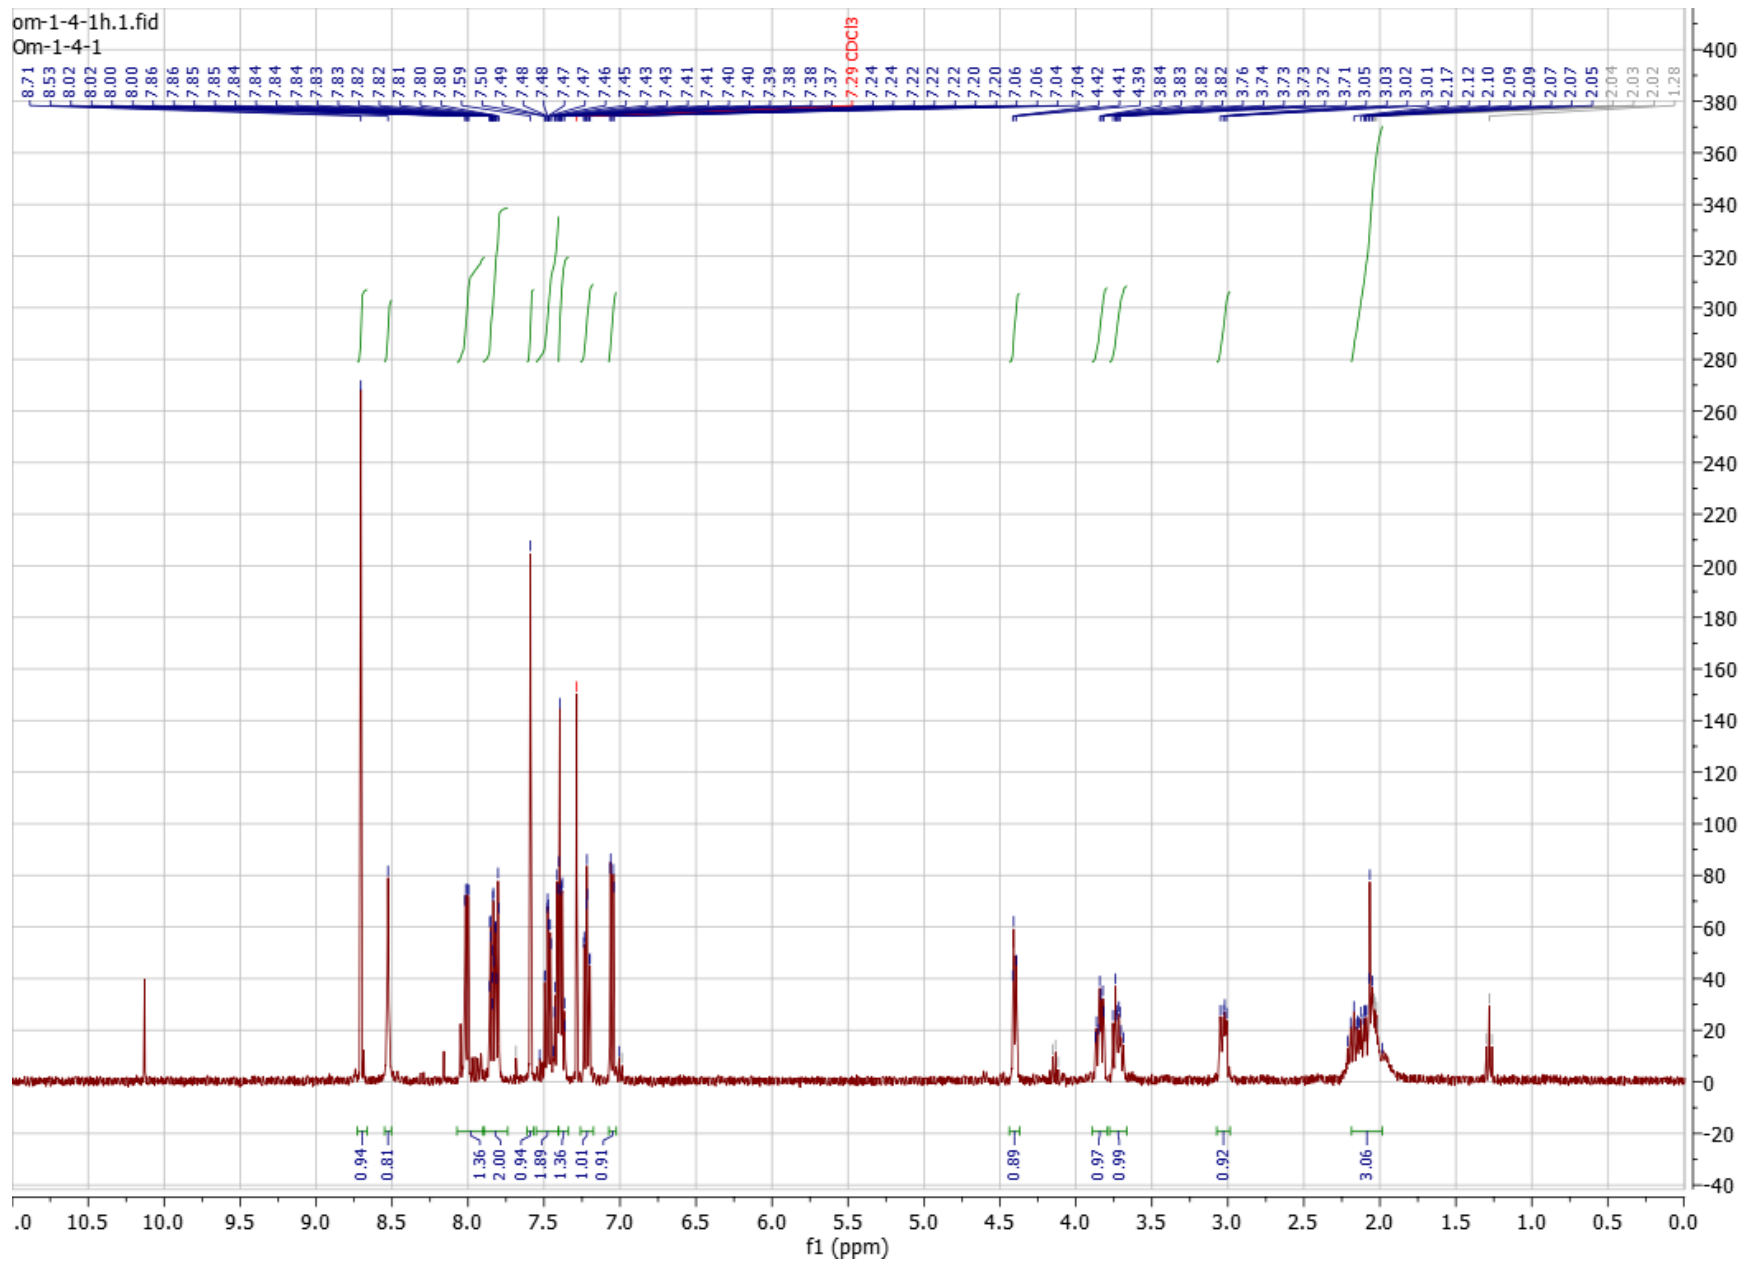

SI 15:  $^1\text{H}$  NMR spectrum of 4h [400 MHz,  $\text{CDCl}_3\text{-}d$ ]

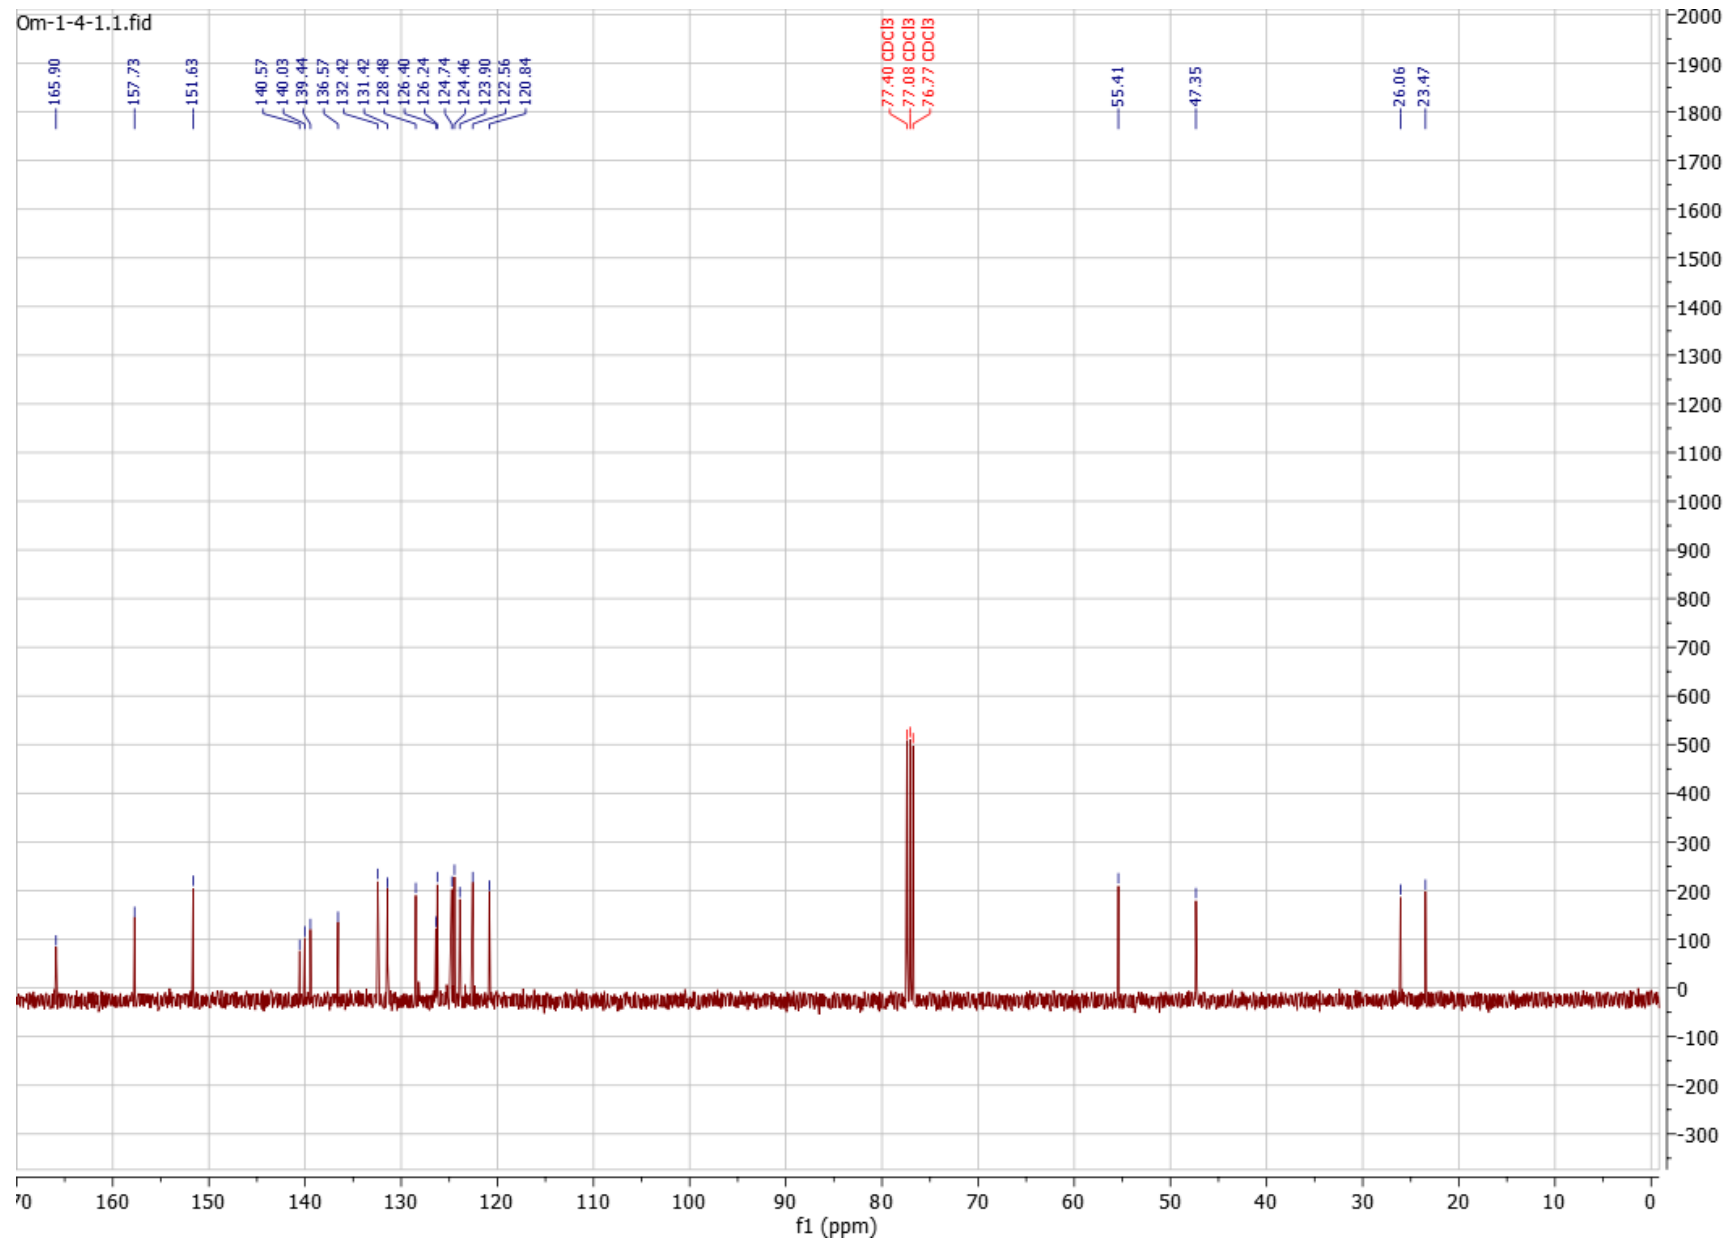

**SI 16:** <sup>13</sup>C NMR spectrum of 4h [100 MHz, CDCl<sub>3</sub>-d]

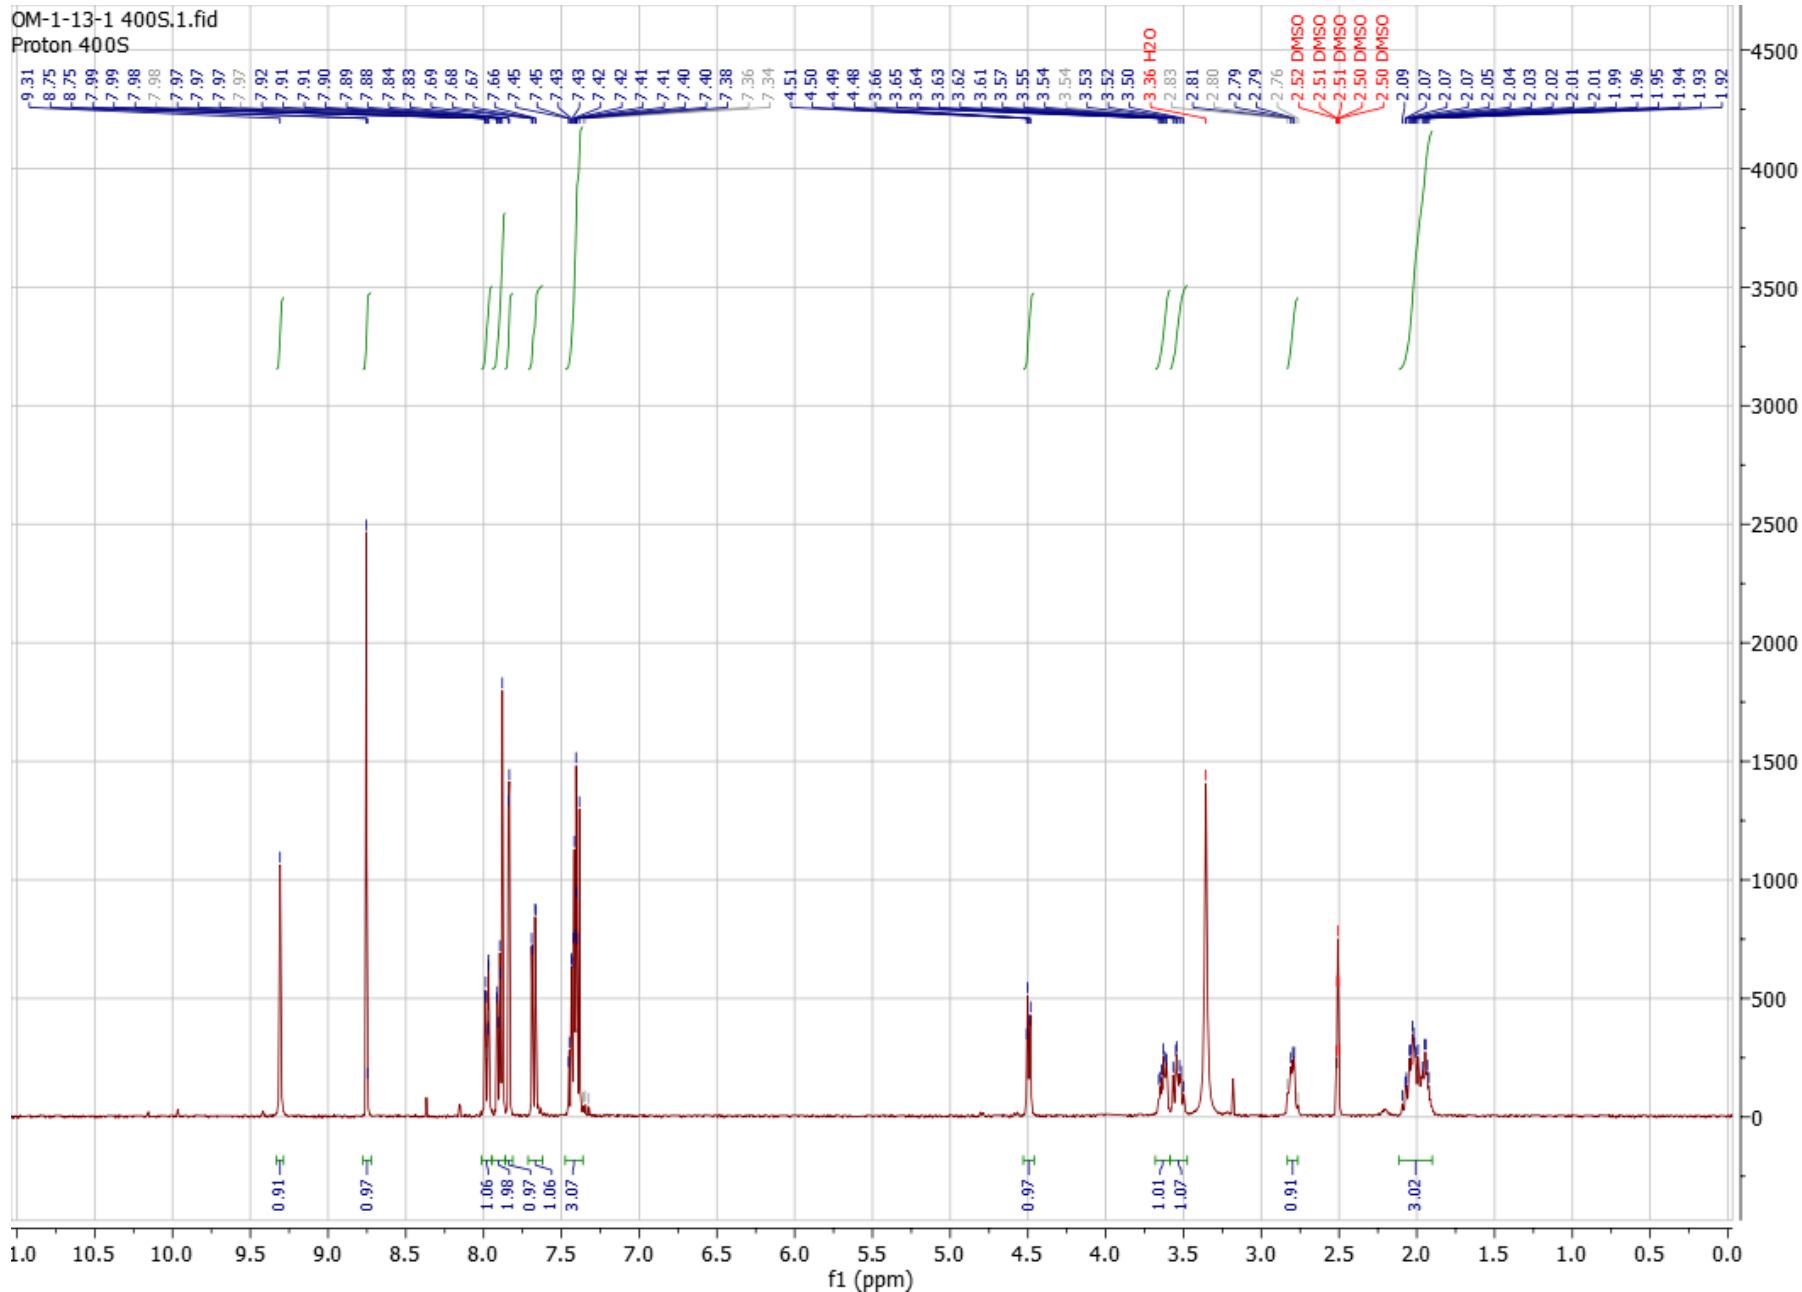

SI 17:  $^1\text{H}$  NMR spectrum of 4i [400 MHz,  $\text{DMSO-}d_6$ ]

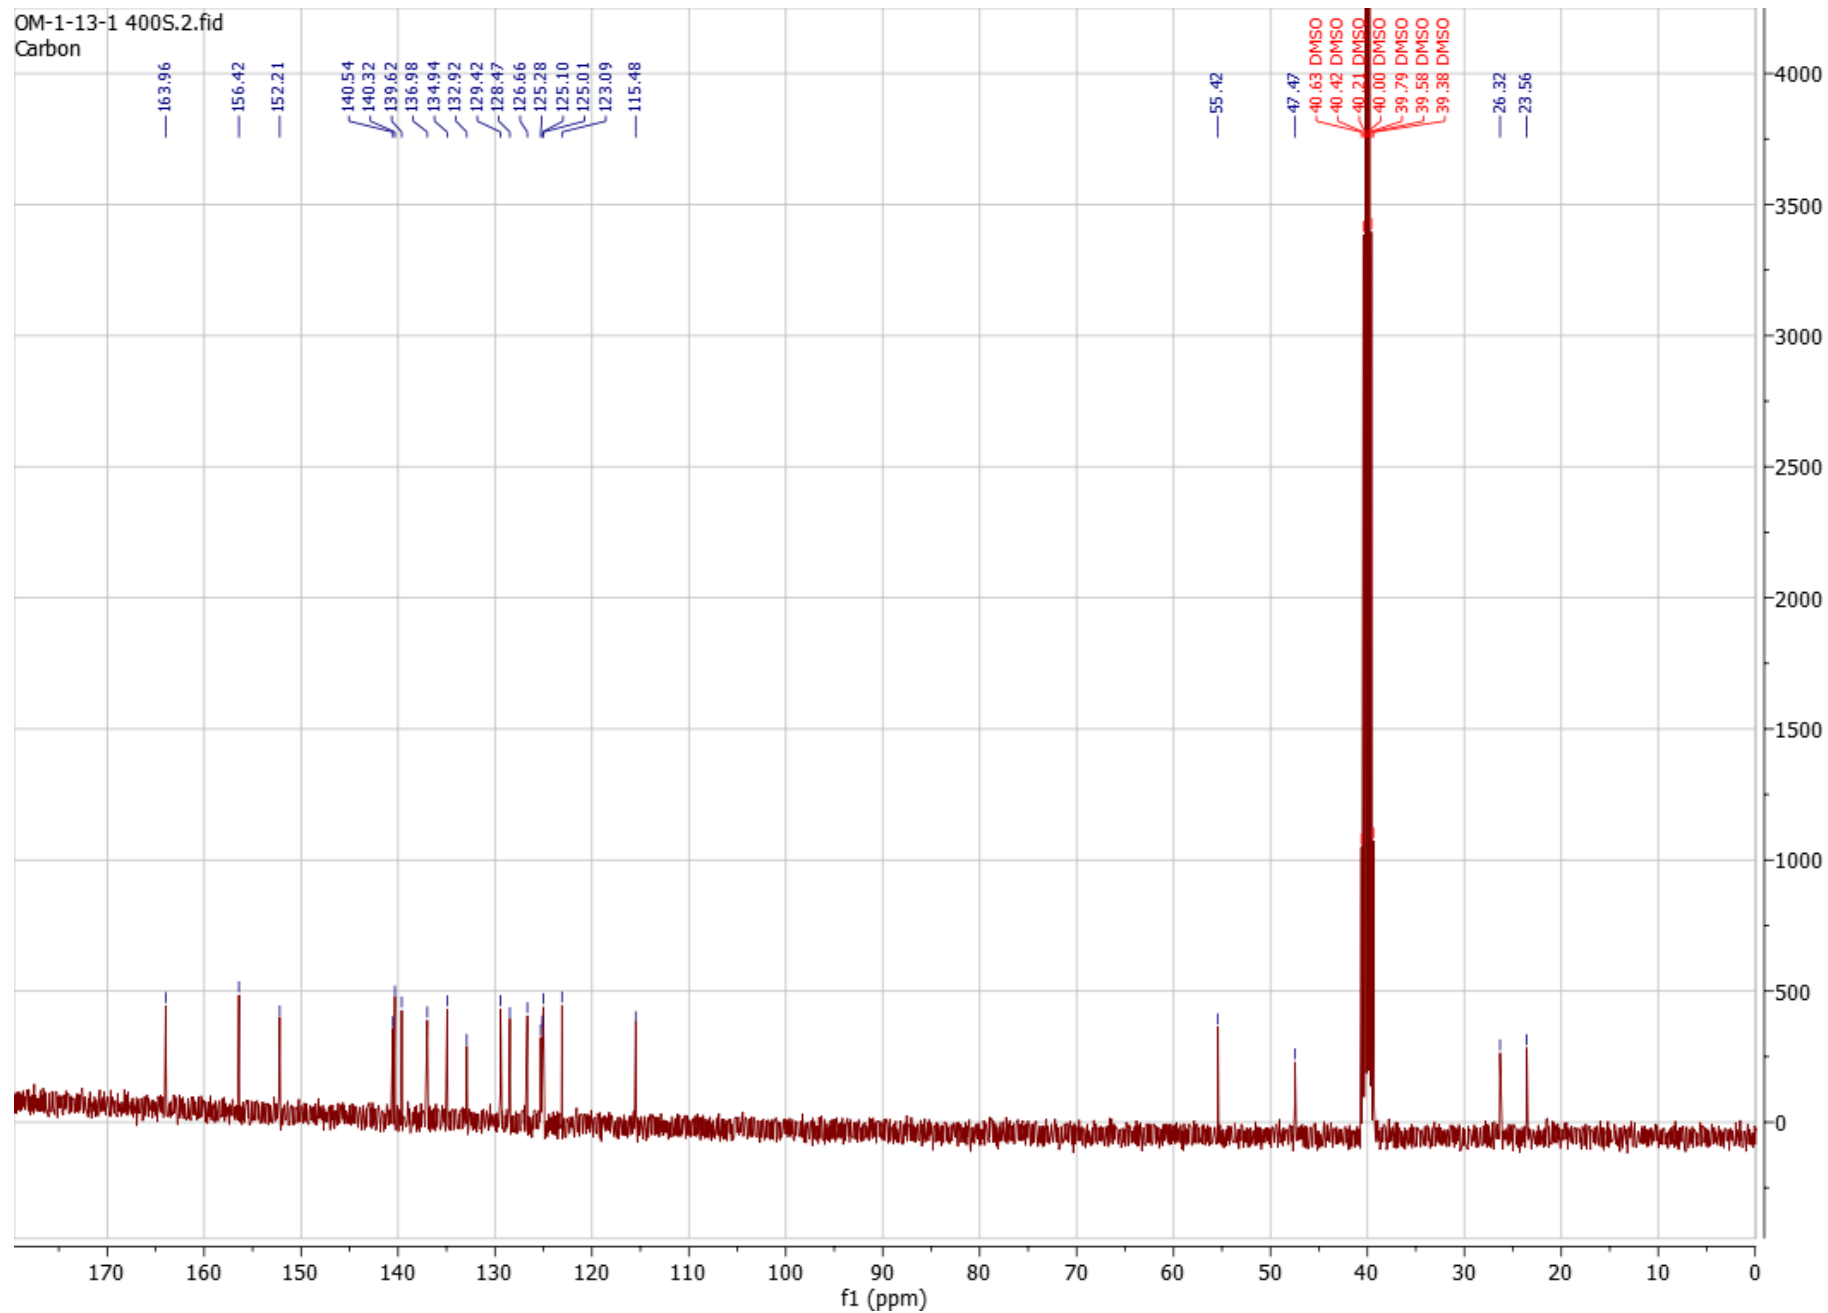

SI 18: <sup>13</sup>C NMR spectrum of 4i [400 MHz, DMSO-*d*<sub>6</sub>]

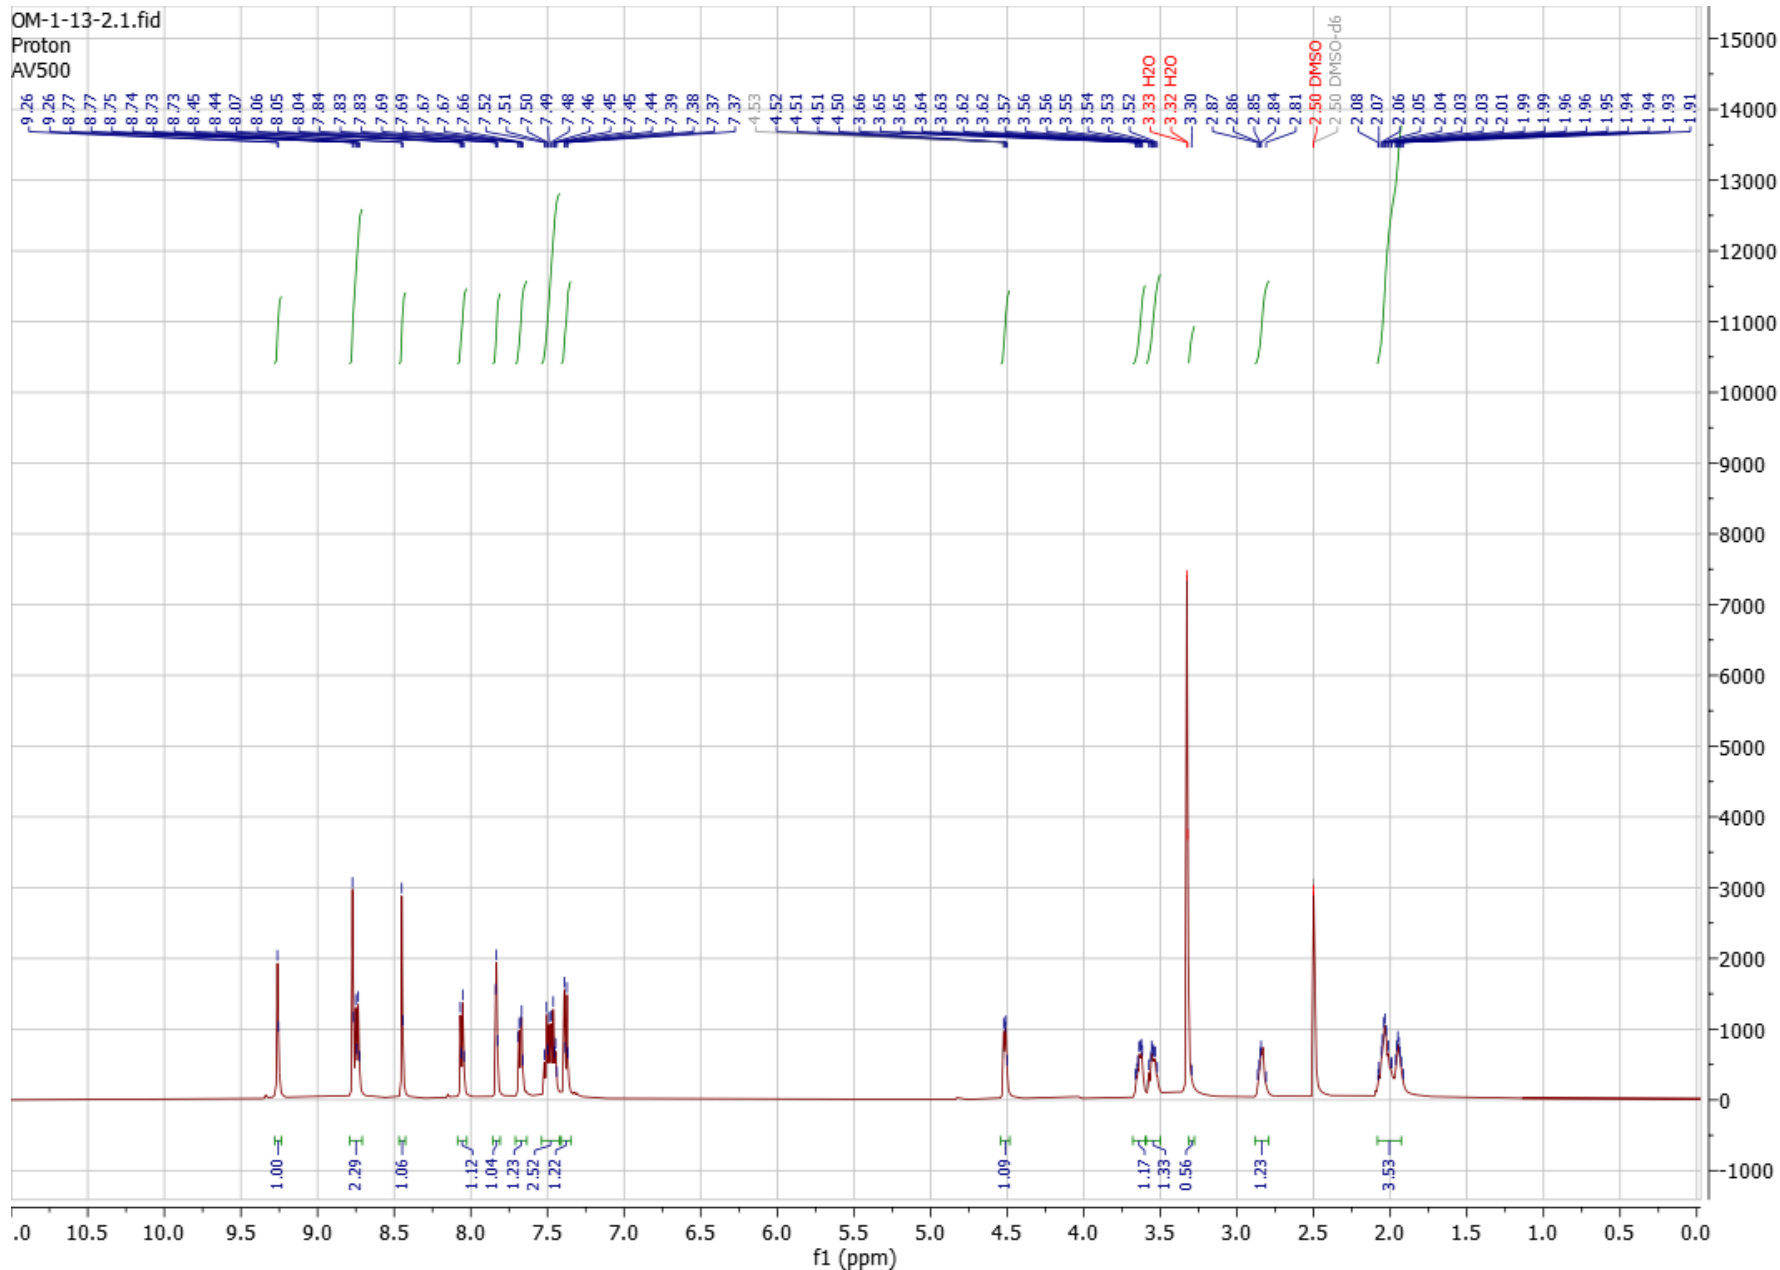

SI 19:  $^1\text{H}$  NMR spectrum of 4j [500 MHz, DMSO- $d_6$ ]

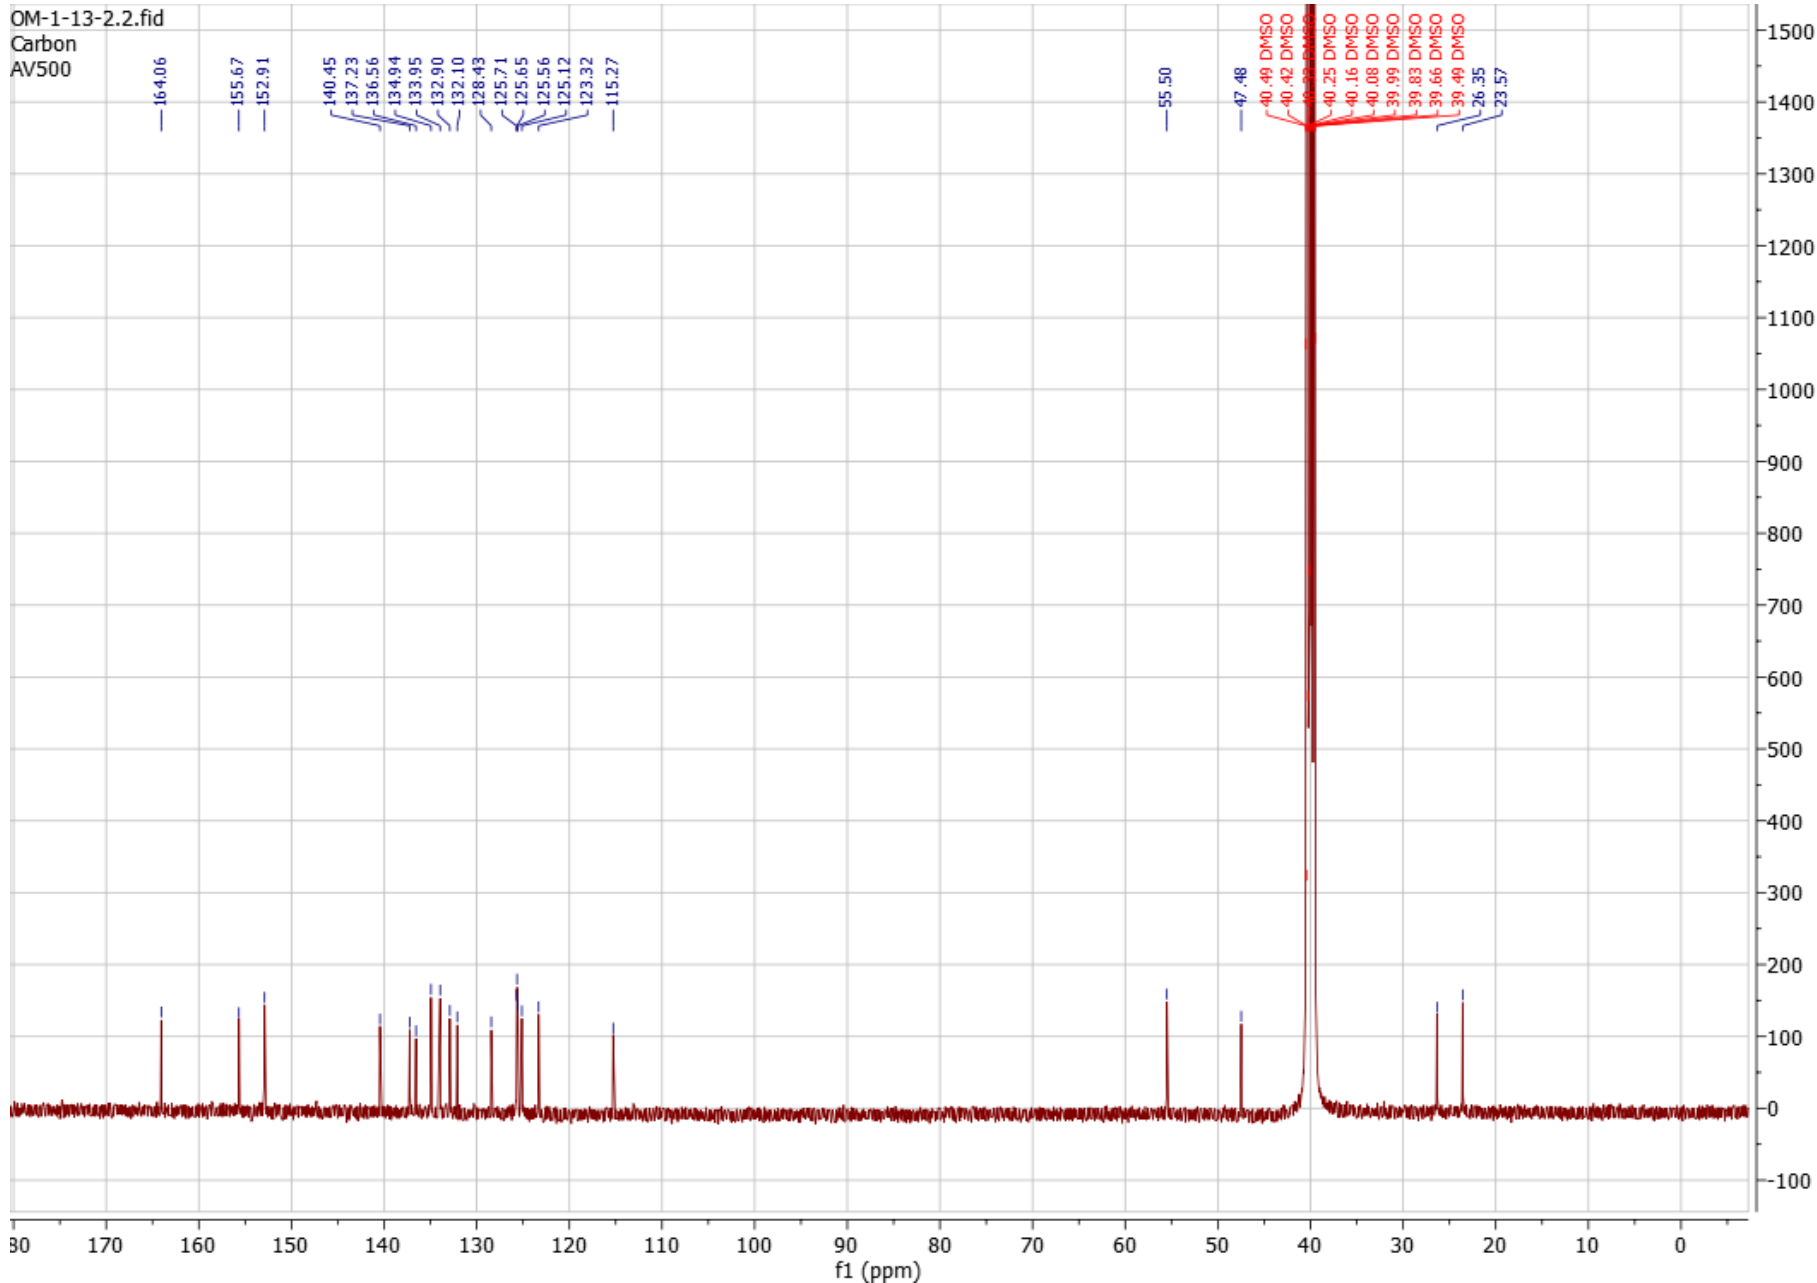

SI20:  $^{13}\text{C}$  NMR spectrum of 4j [125 MHz, DMSO- $d_6$ ]

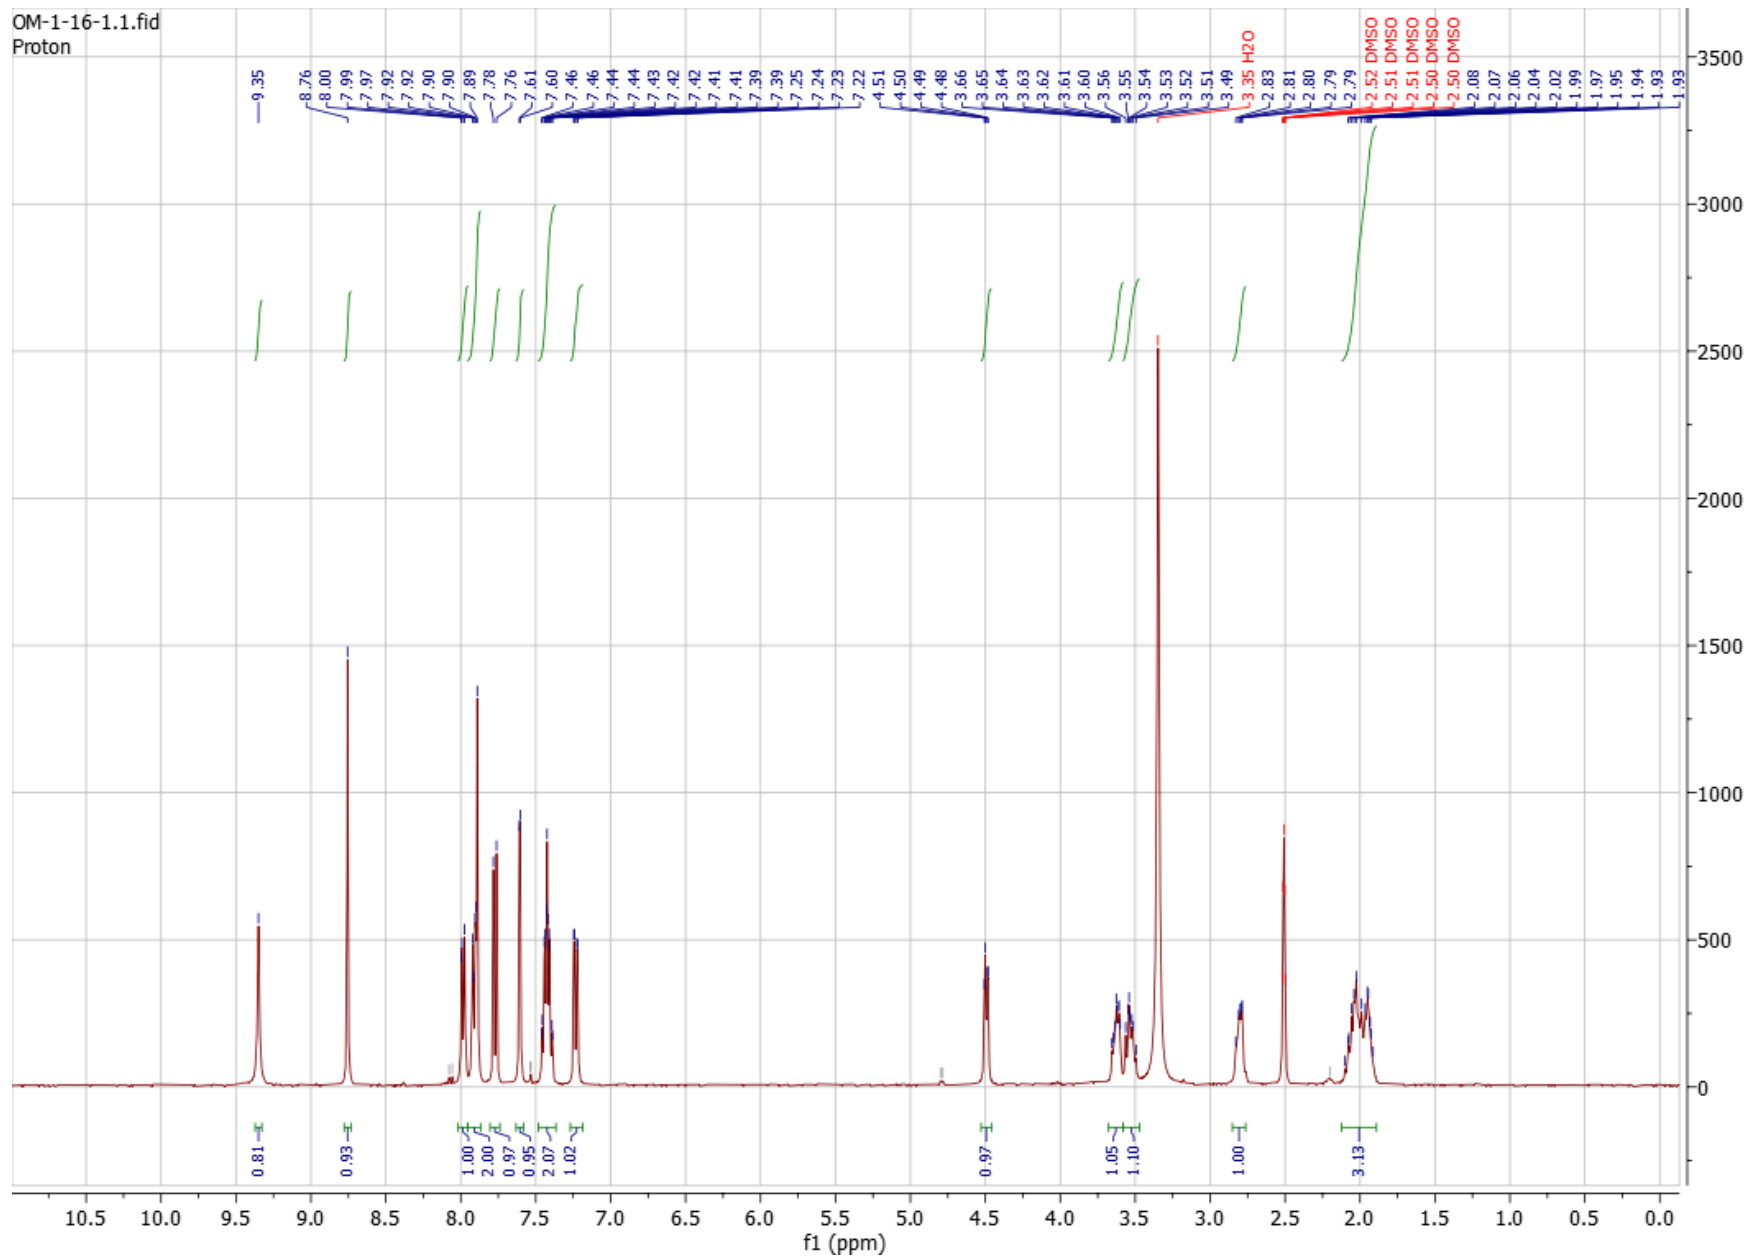

**SI21:**  $^1\text{H}$  NMR spectrum of 4k [400 MHz, DMSO- $d_6$ ]



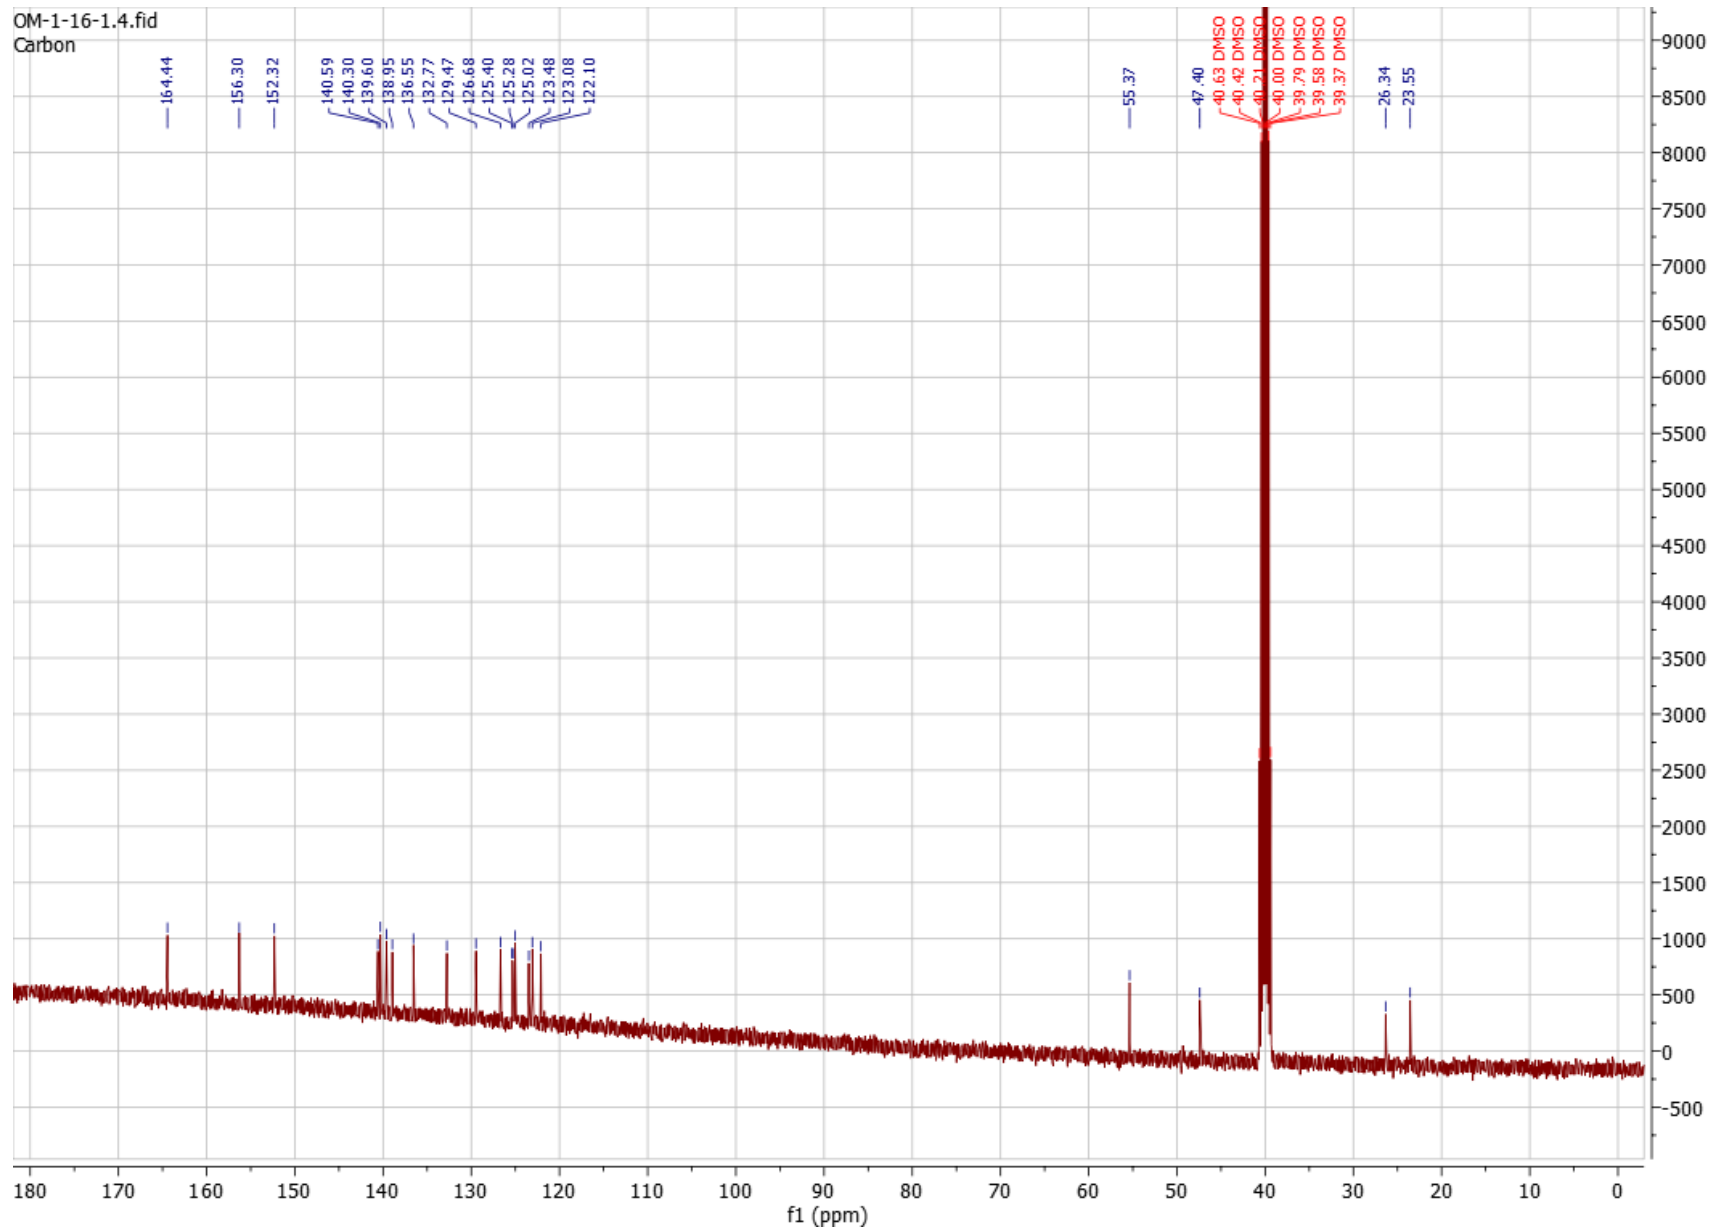

**SI22:**  $^{13}\text{C}$  NMR spectrum of 4k [100 MHz, DMSO- $d_6$ ]

OM-1-4-23h.1.fid  
Proton  
OM-1-4-23

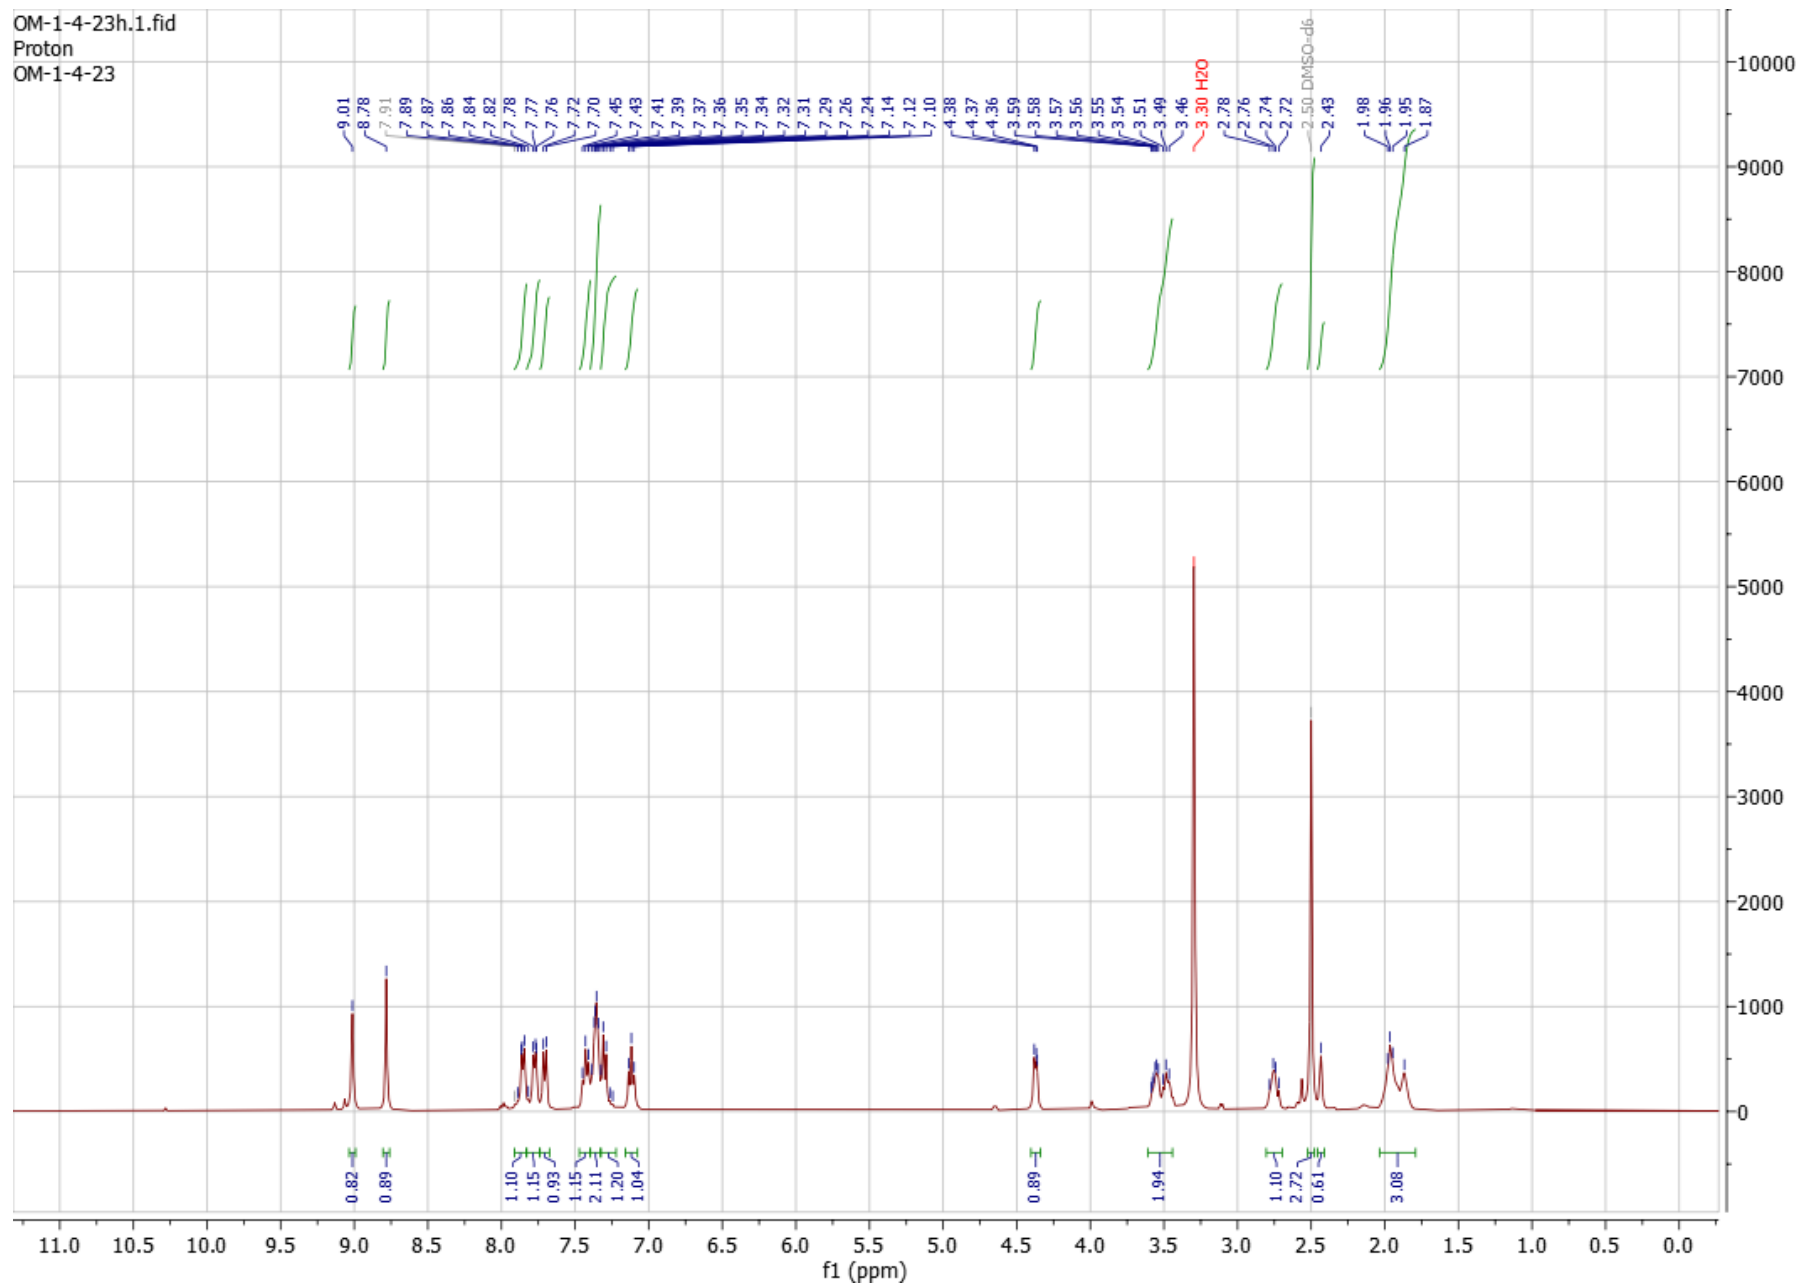

SI23:  $^1\text{H}$  NMR spectrum of 4l [400 MHz,  $\text{DMSO}-d_6$ ]

OM-1-4-23h.3.fid

Carbon

OM-1-4-23

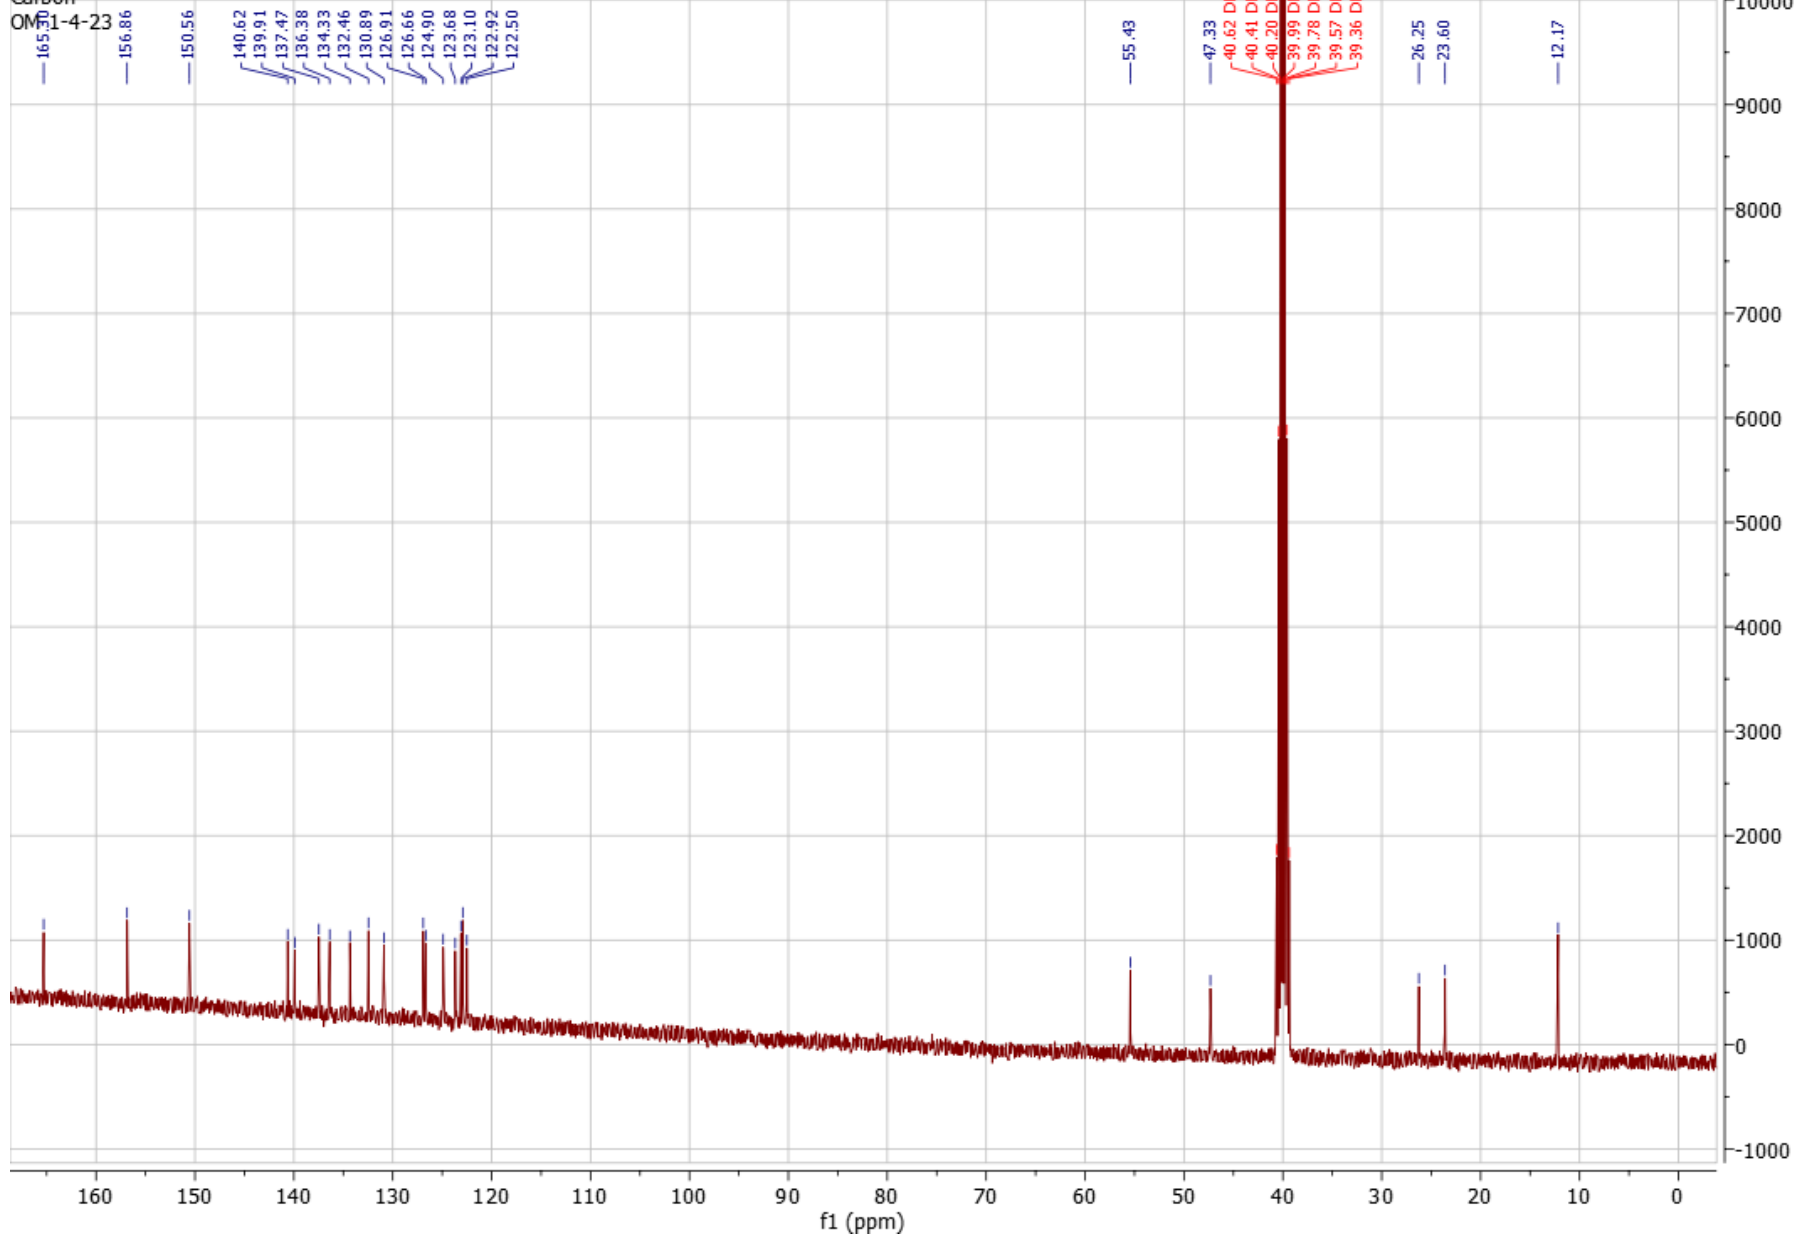SI24:  $^{13}\text{C}$  NMR spectrum of 4l [100 MHz,  $\text{DMSO-}d_6$ ]

OM-1-4-27.1.fid  
OM-1-4-27  
PROTON

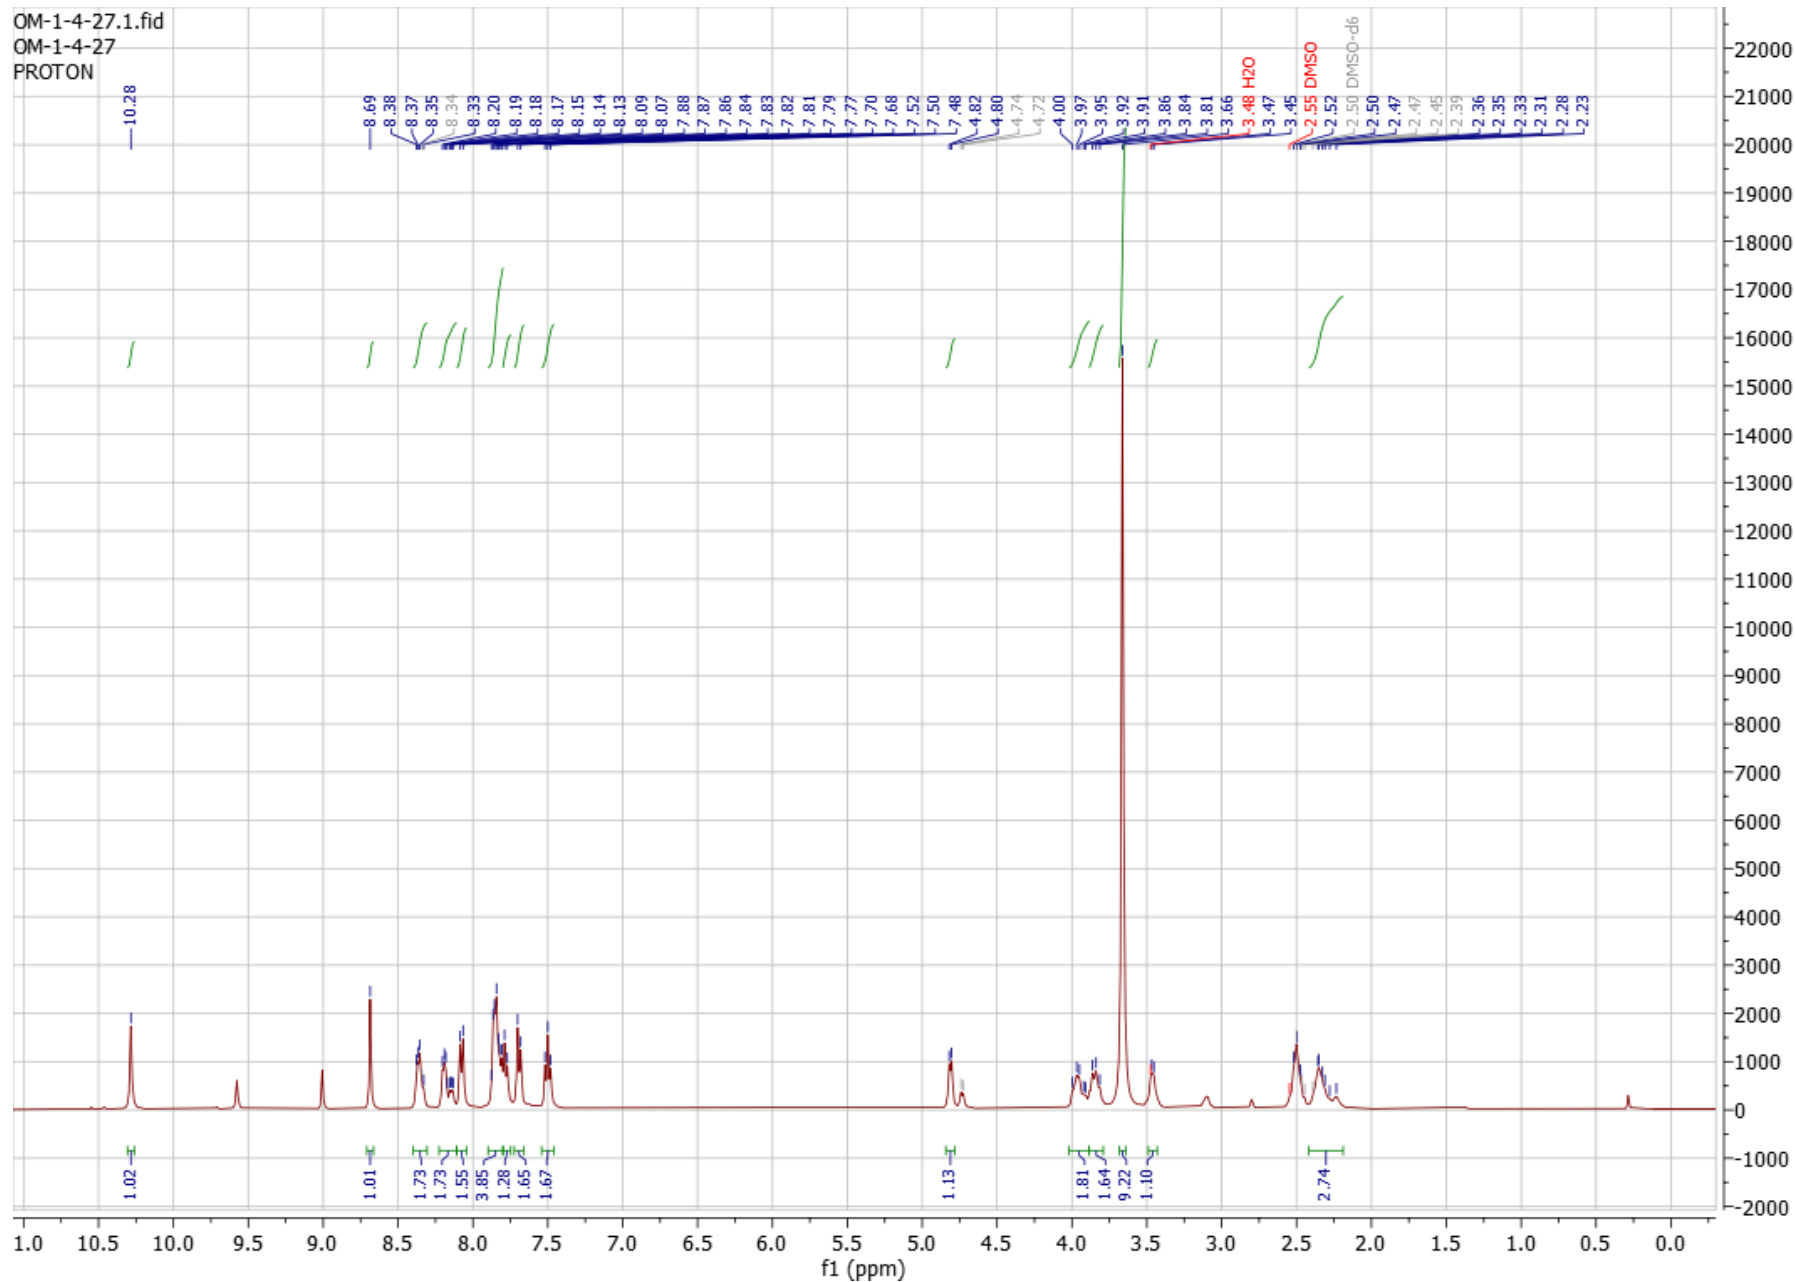

SI25:  $^1\text{H}$  NMR spectrum of 4m [400 MHz, DMSO- $d_6$ ]

OM-1-4-27.4.fid  
OM-1-4-27  
carbon

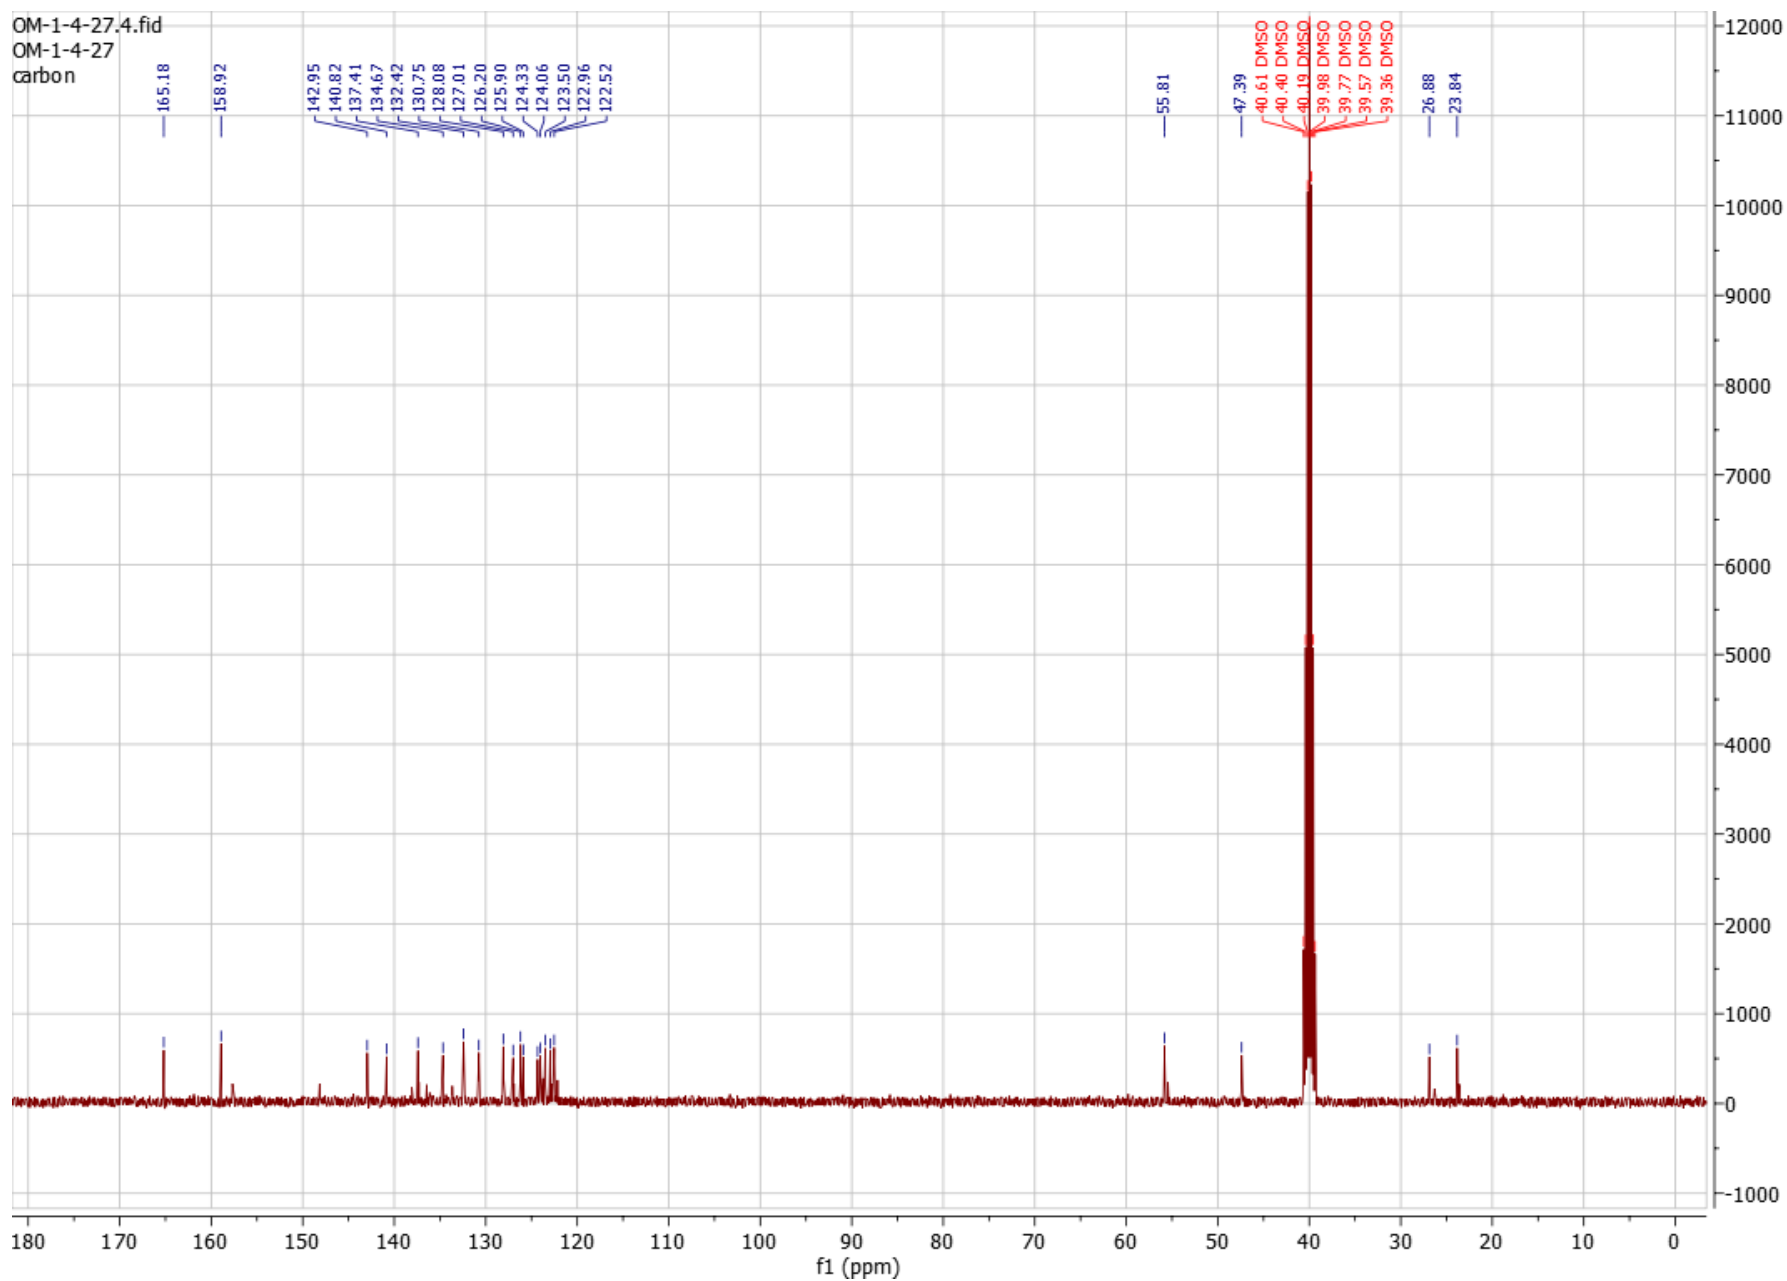

SI26:  $^{13}\text{C}$  NMR spectrum of 4m [100 MHz, DMSO- $d_6$ ]

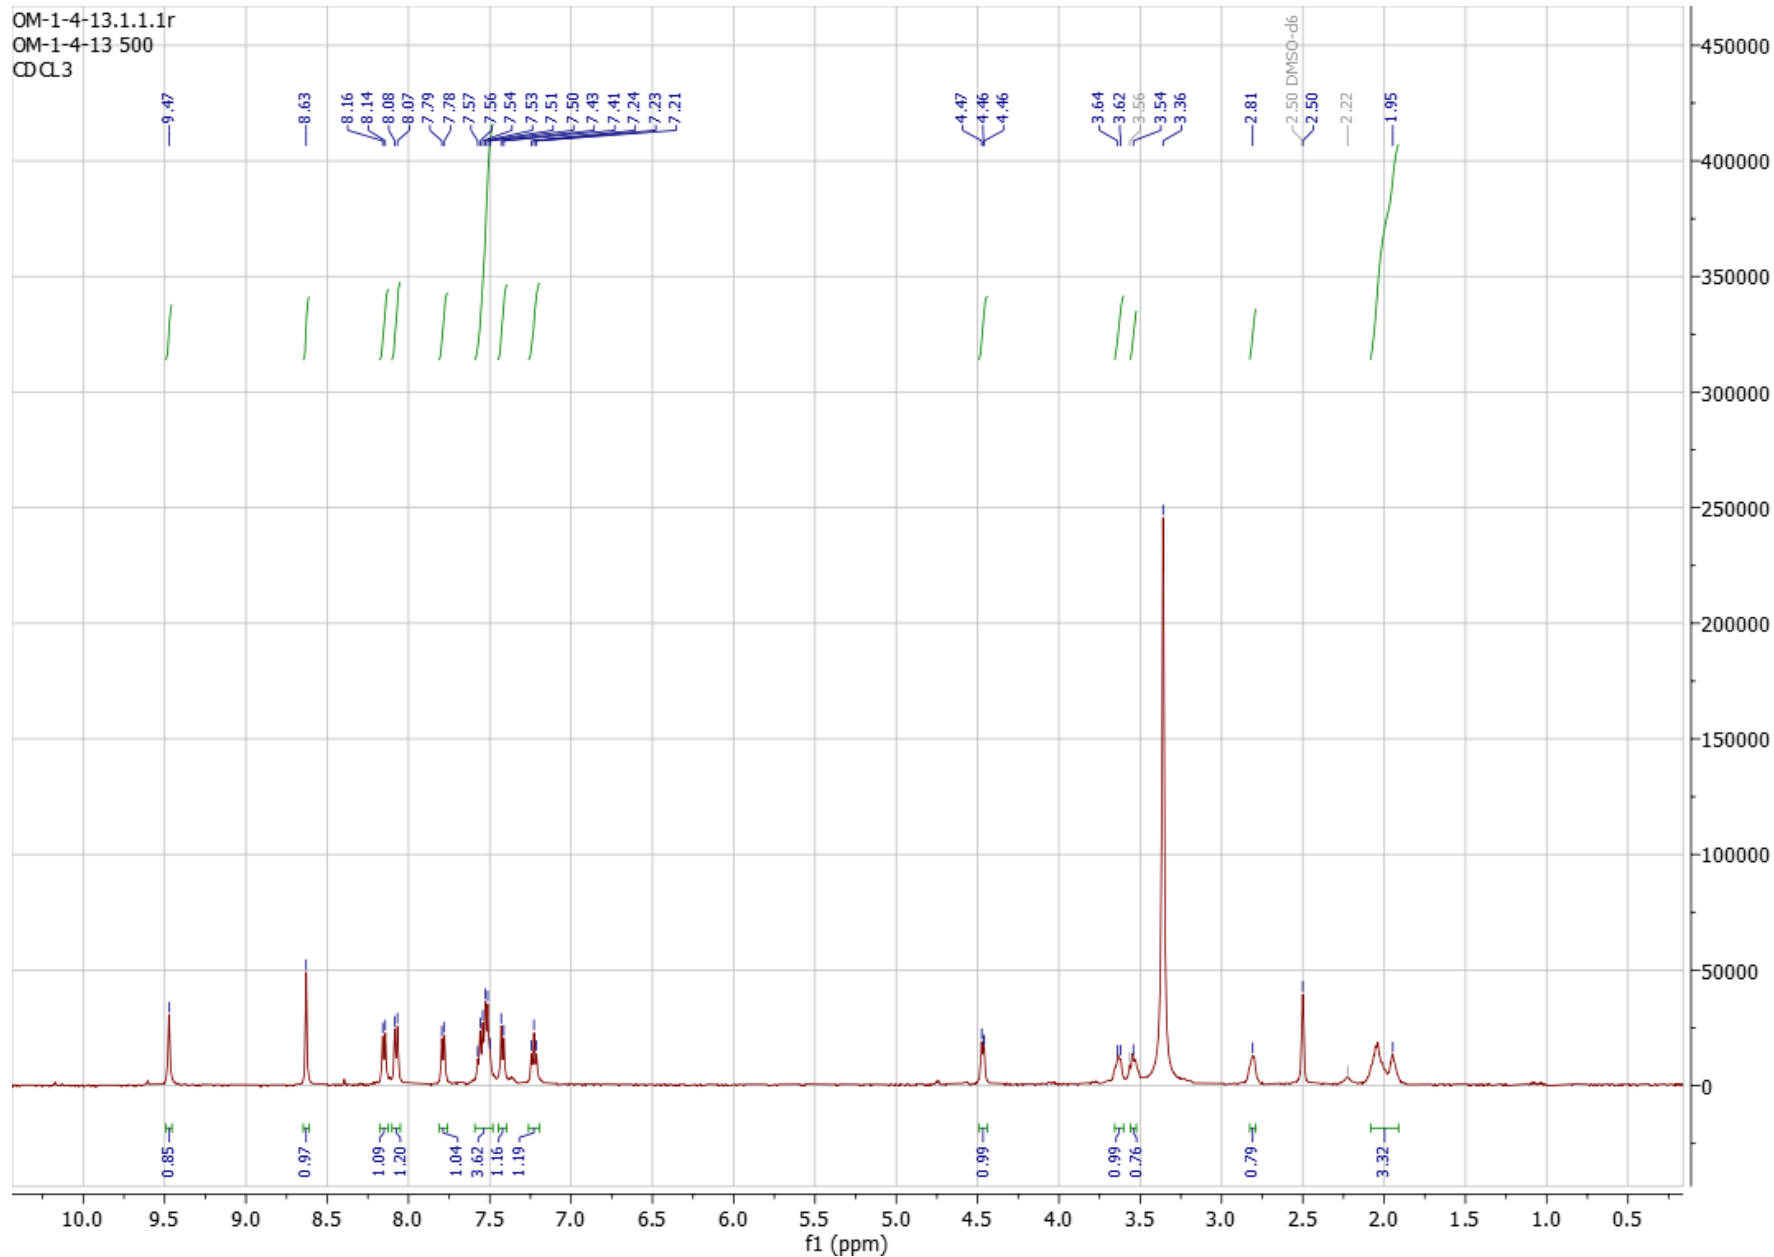

**SI27:** <sup>1</sup>H NMR spectrum of 4n [500 MHz, DMSO-*d*<sub>6</sub>]

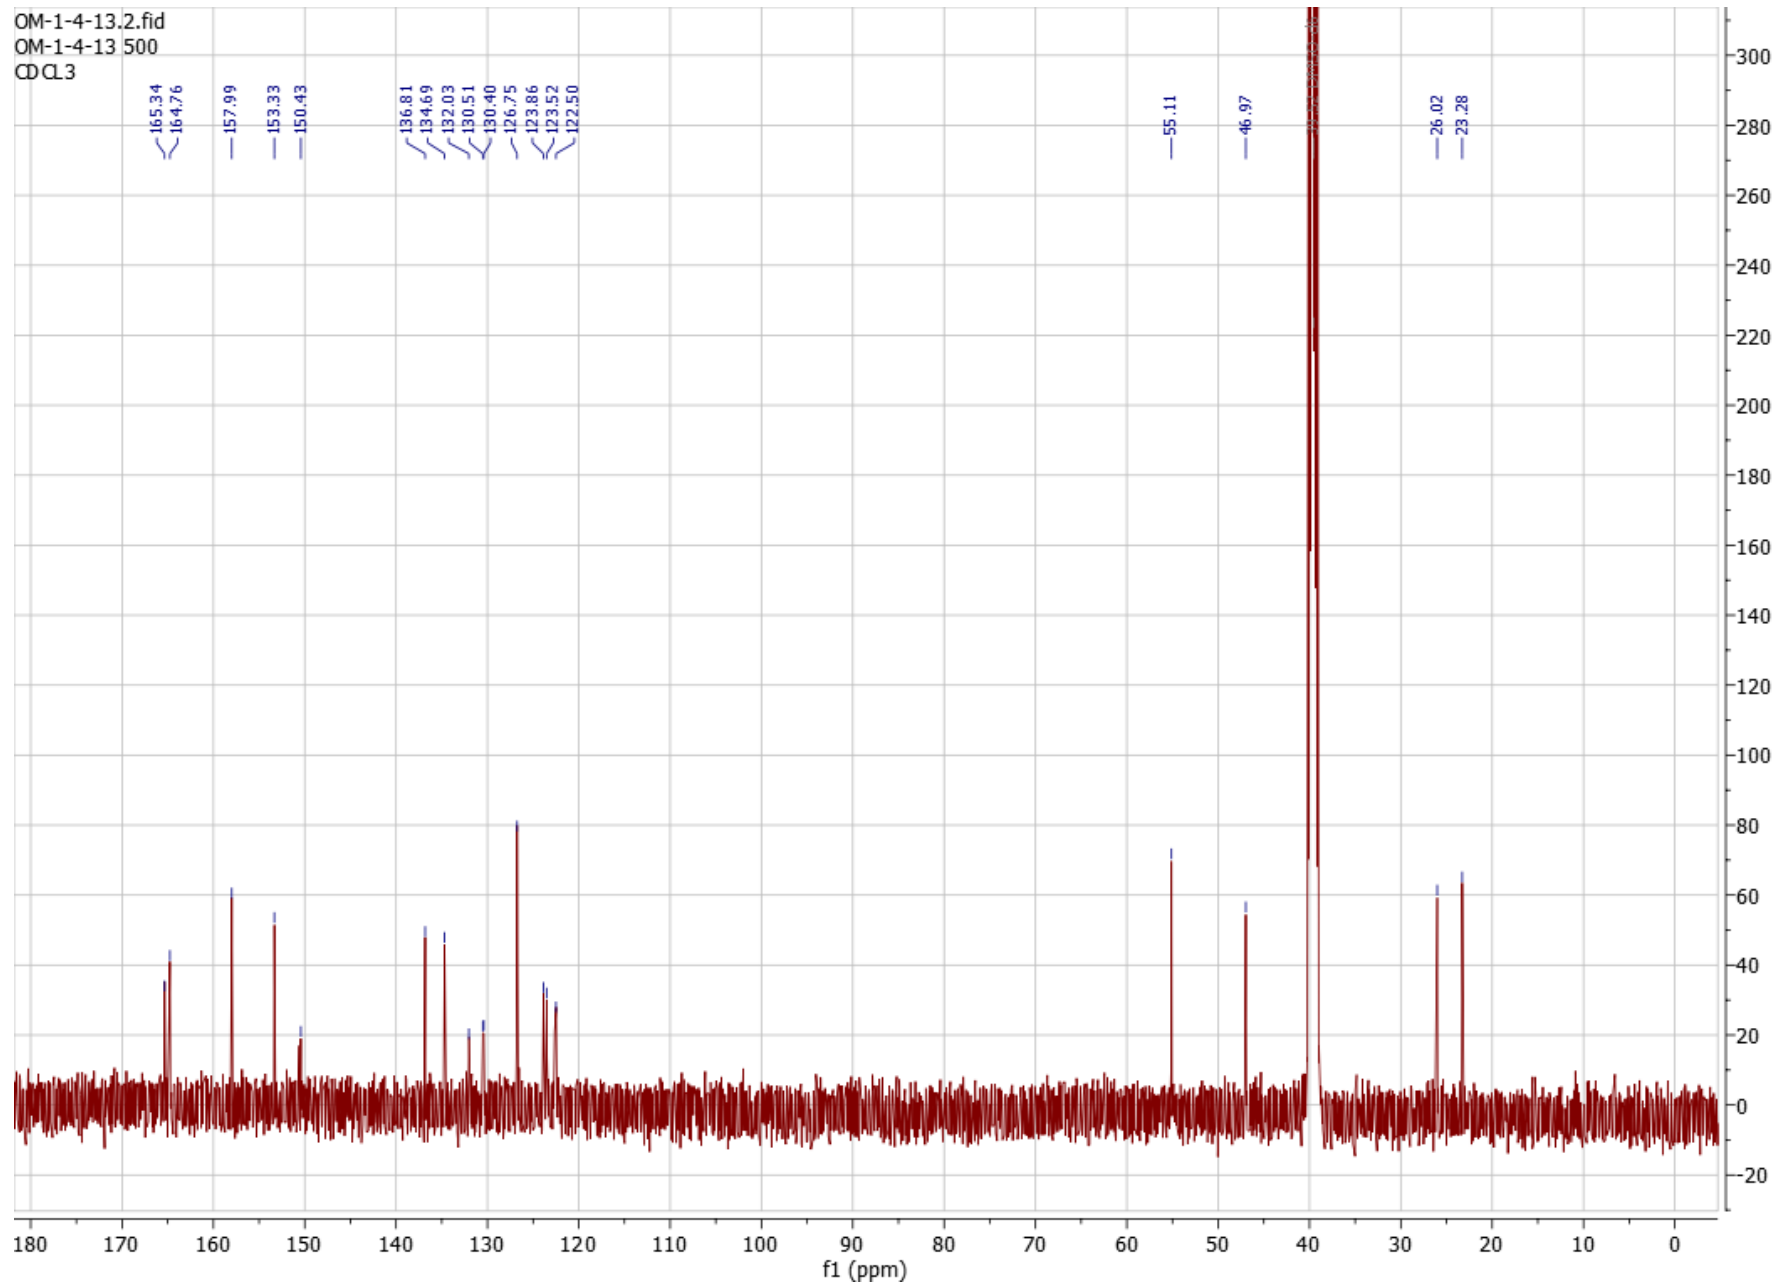

SI28:  $^{13}\text{C}$  NMR spectrum of 4n [125 MHz, DMSO- $d_6$ ]

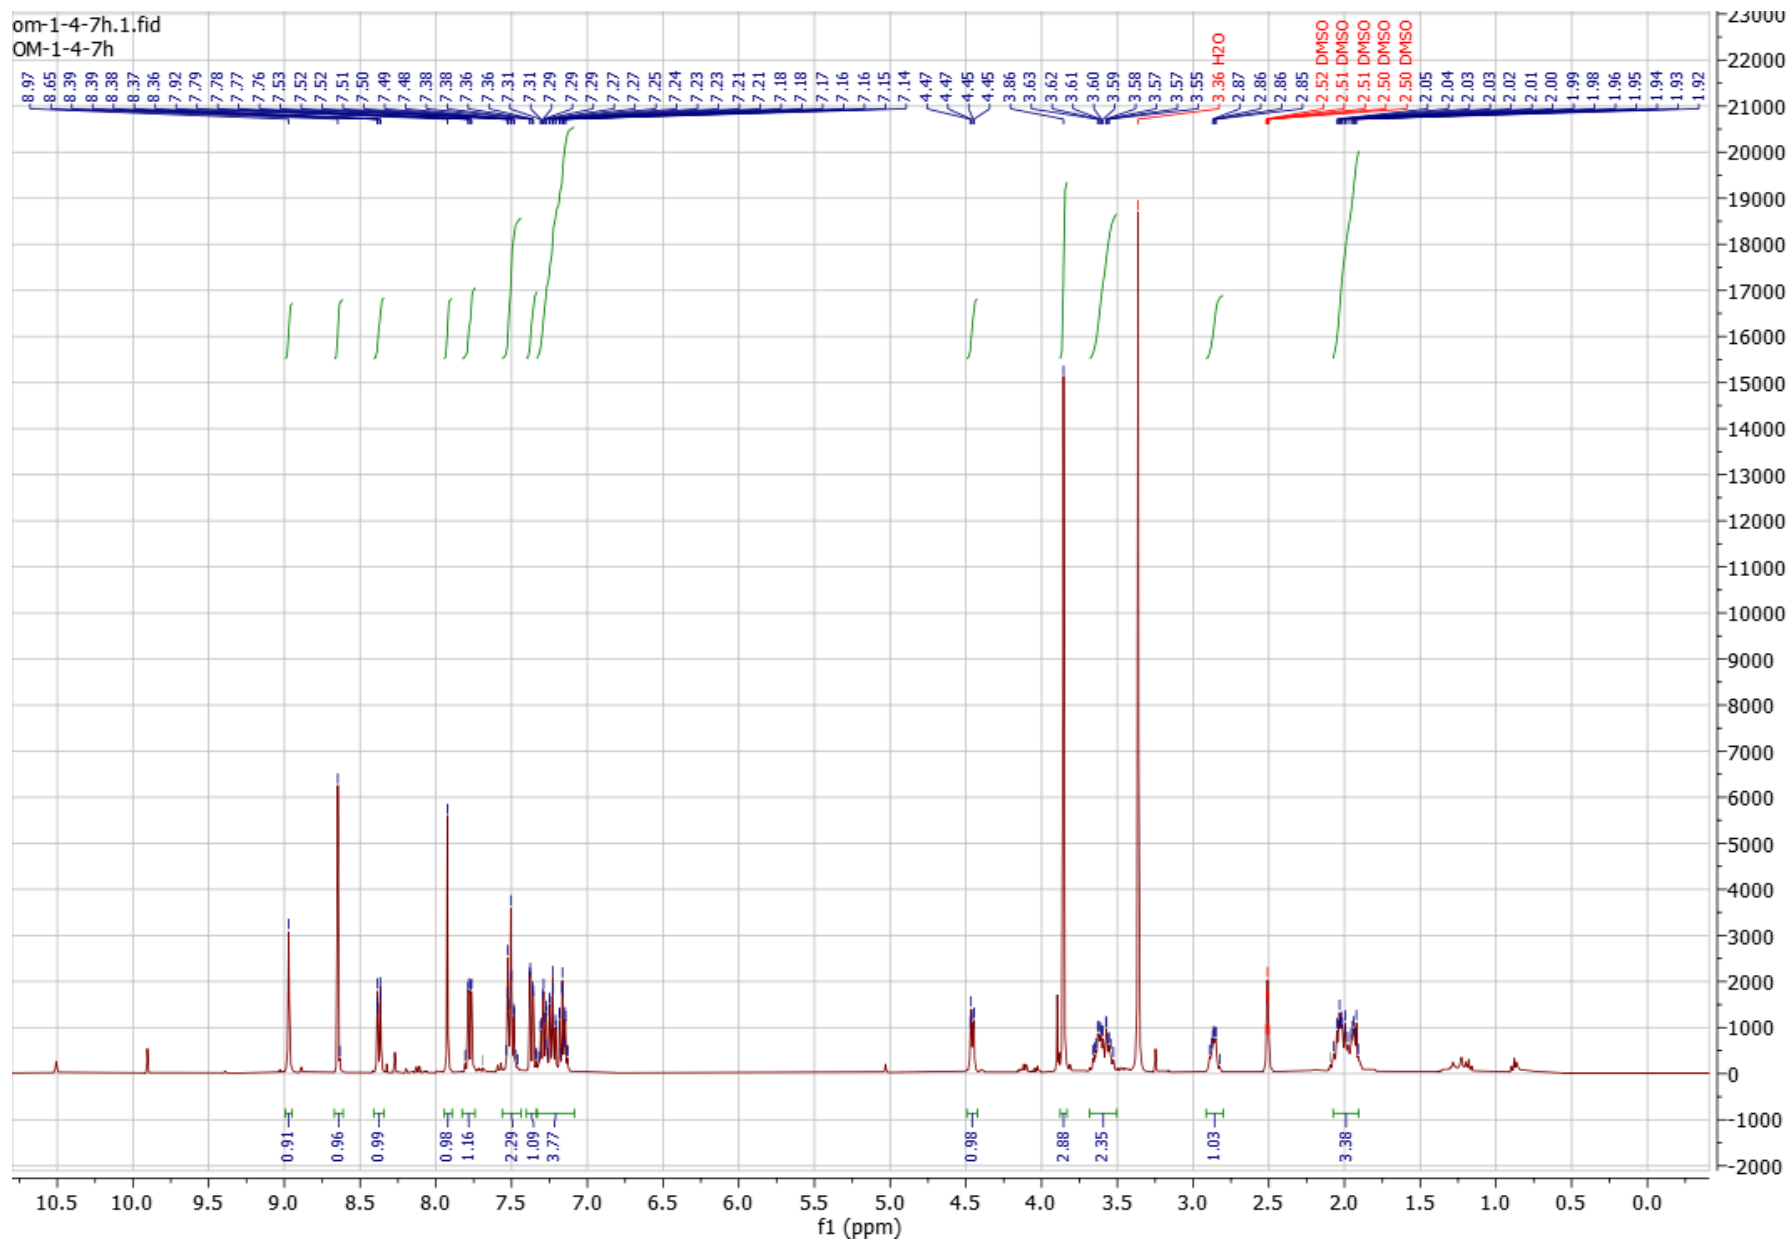

**SI29:**  $^1\text{H}$  NMR spectrum of 4o [400 MHz, DMSO- $d_6$ ]



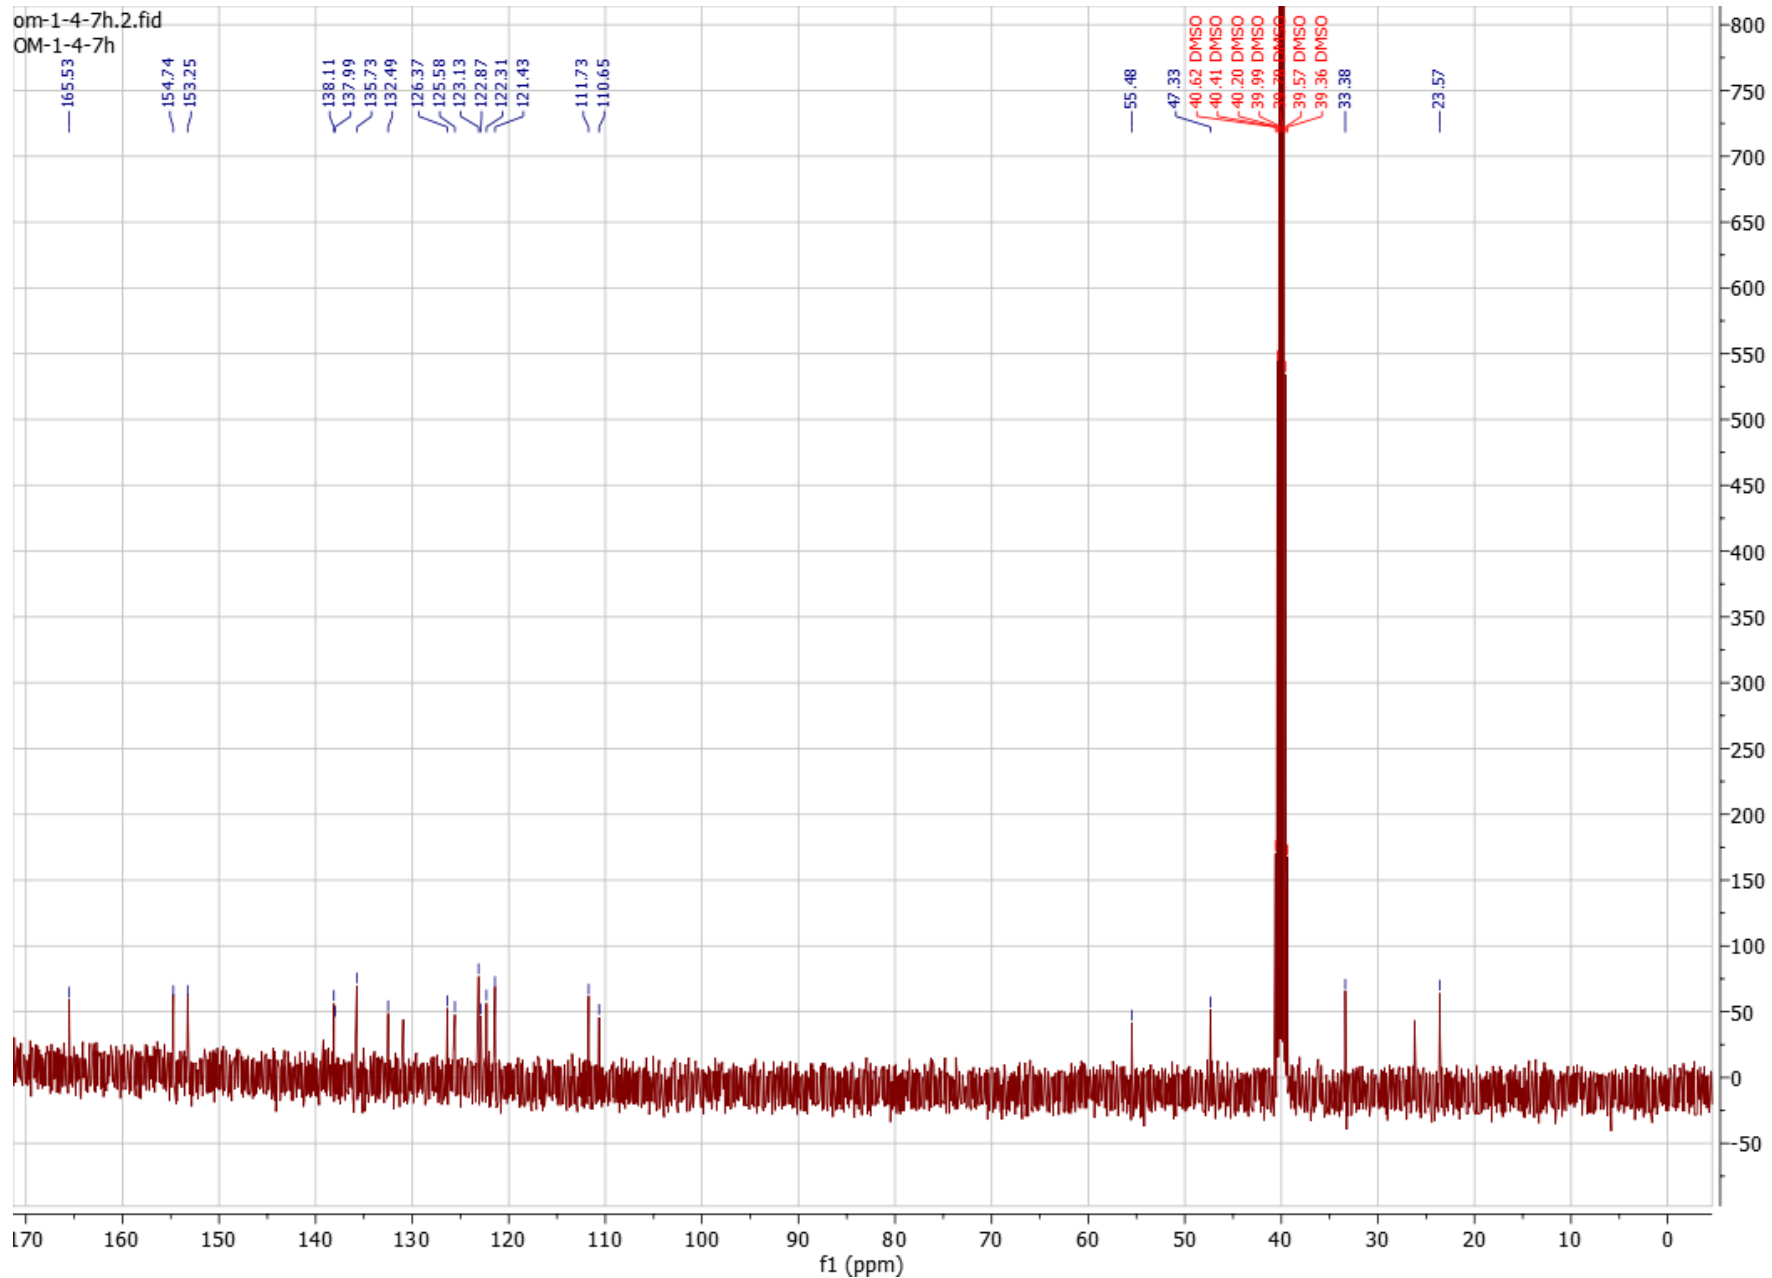

**SI30:**  $^{13}\text{C}$  NMR spectrum of 4o [100 MHz, DMSO- $d_6$ ]

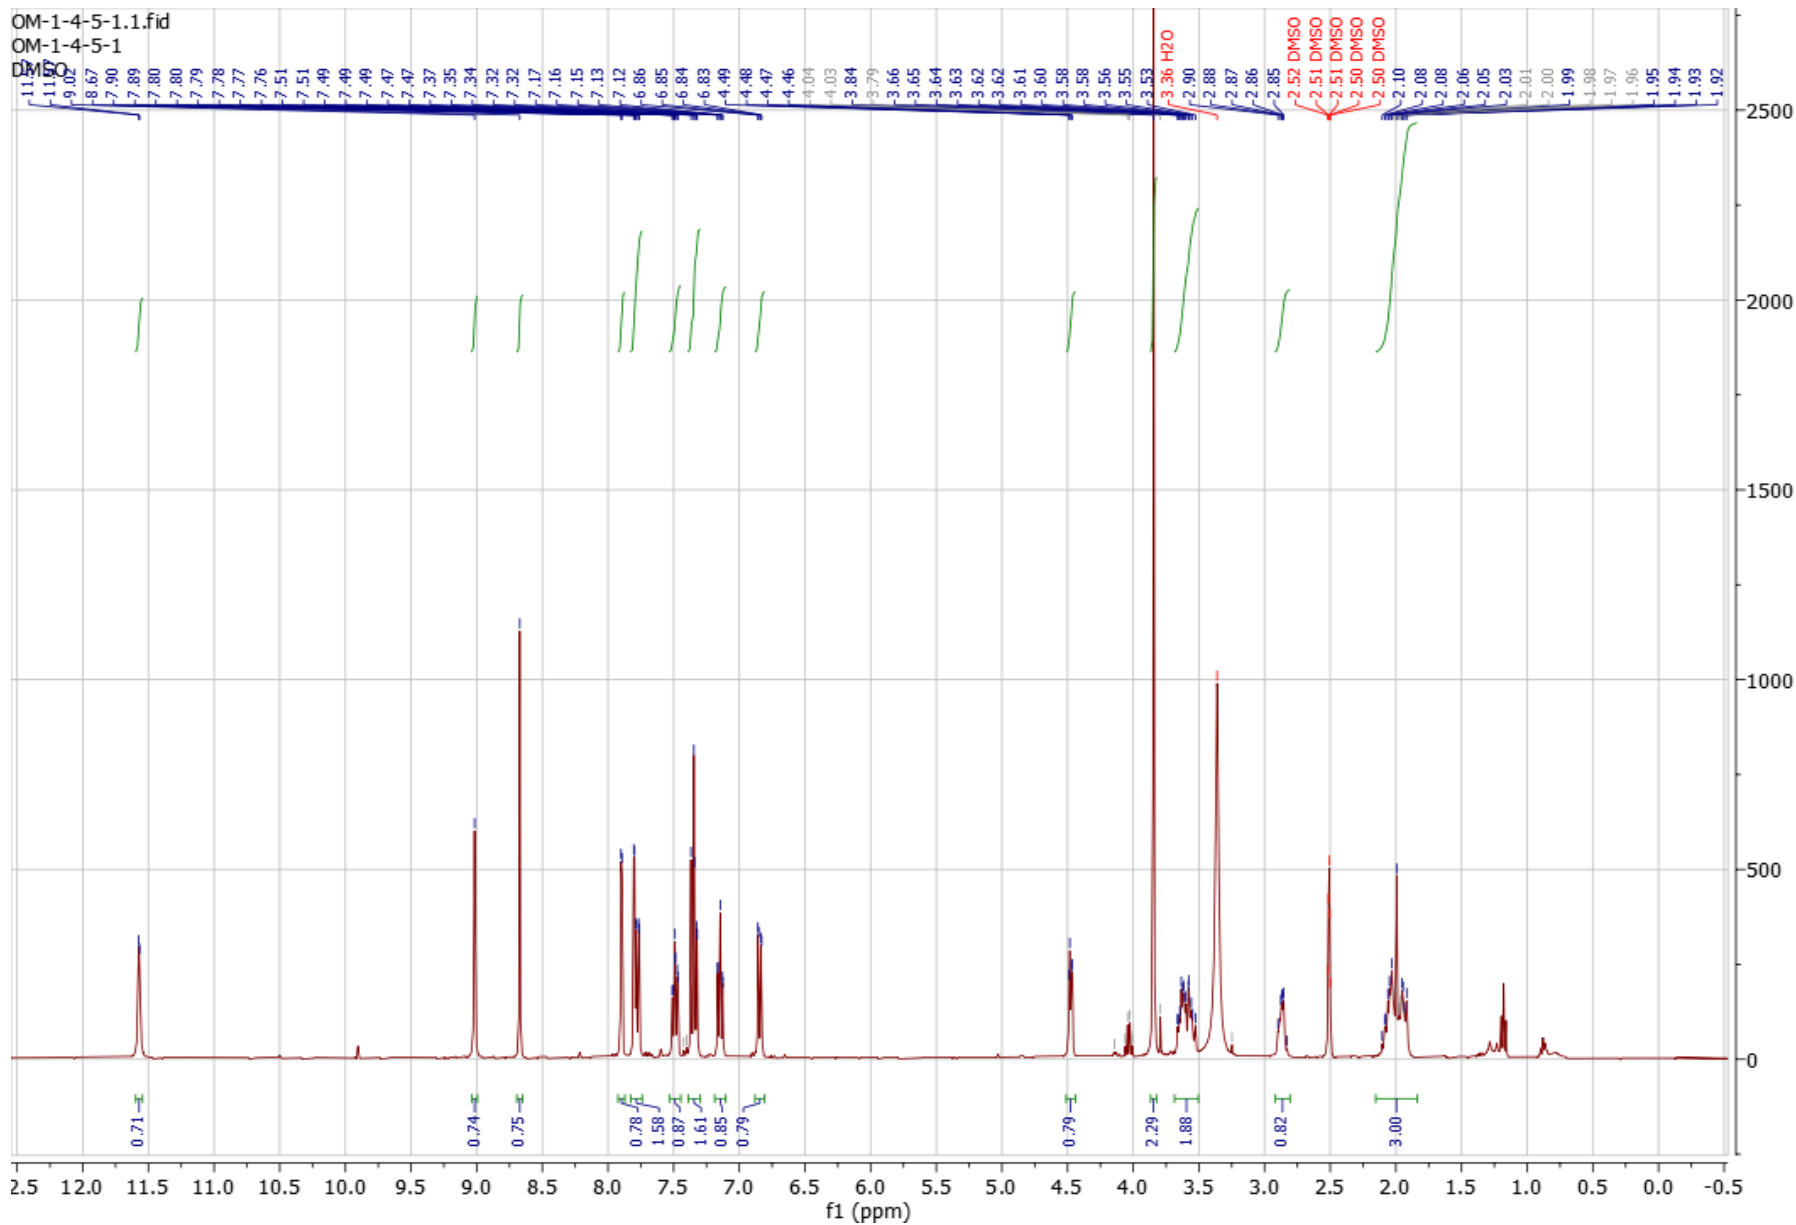

SI31:  $^1\text{H}$  NMR spectrum of 4p [400 MHz, DMSO- $d_6$ ]

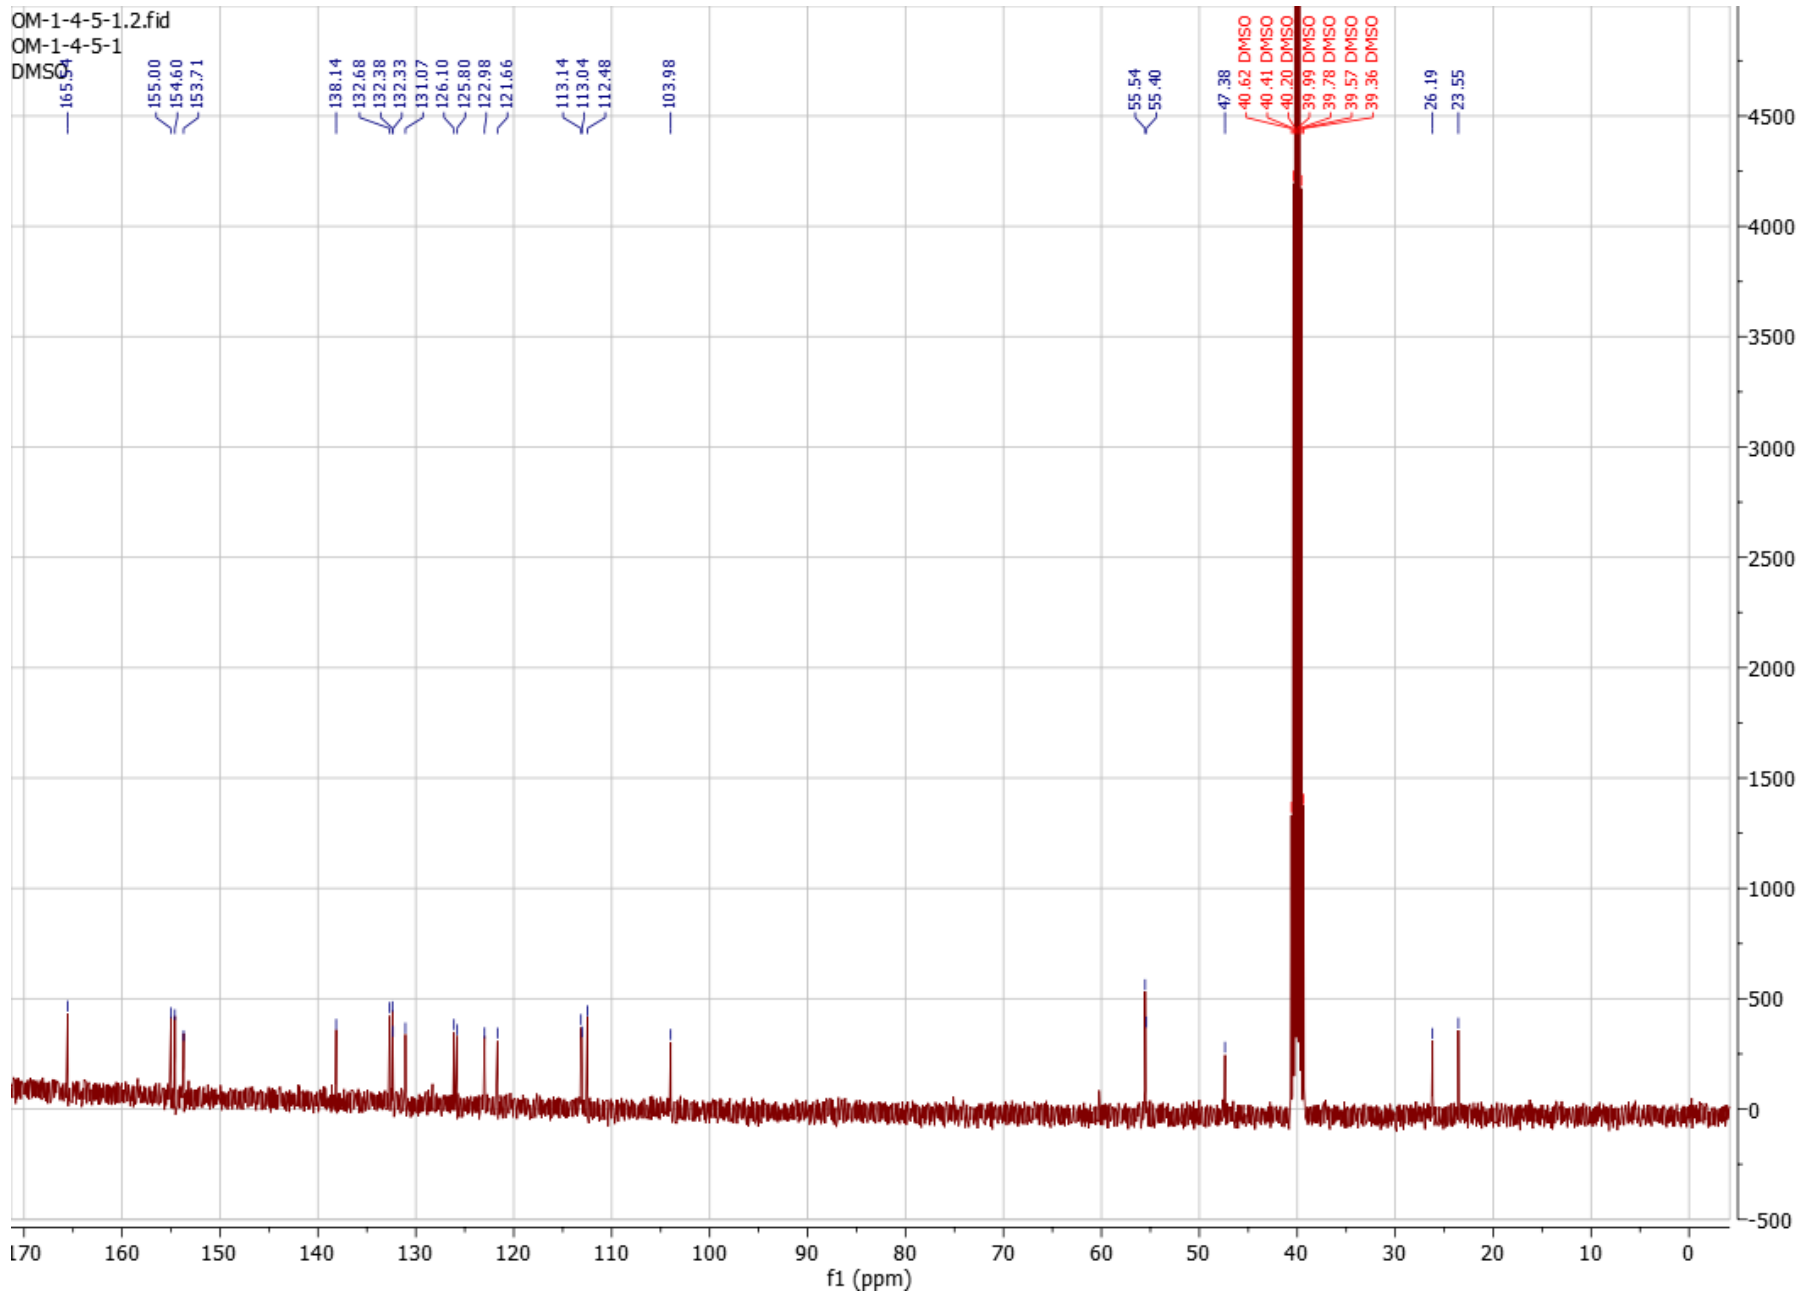

**SI32:**  $^{13}\text{C}$  NMR spectrum of 4p [100 MHz, DMSO- $d_6$ ]

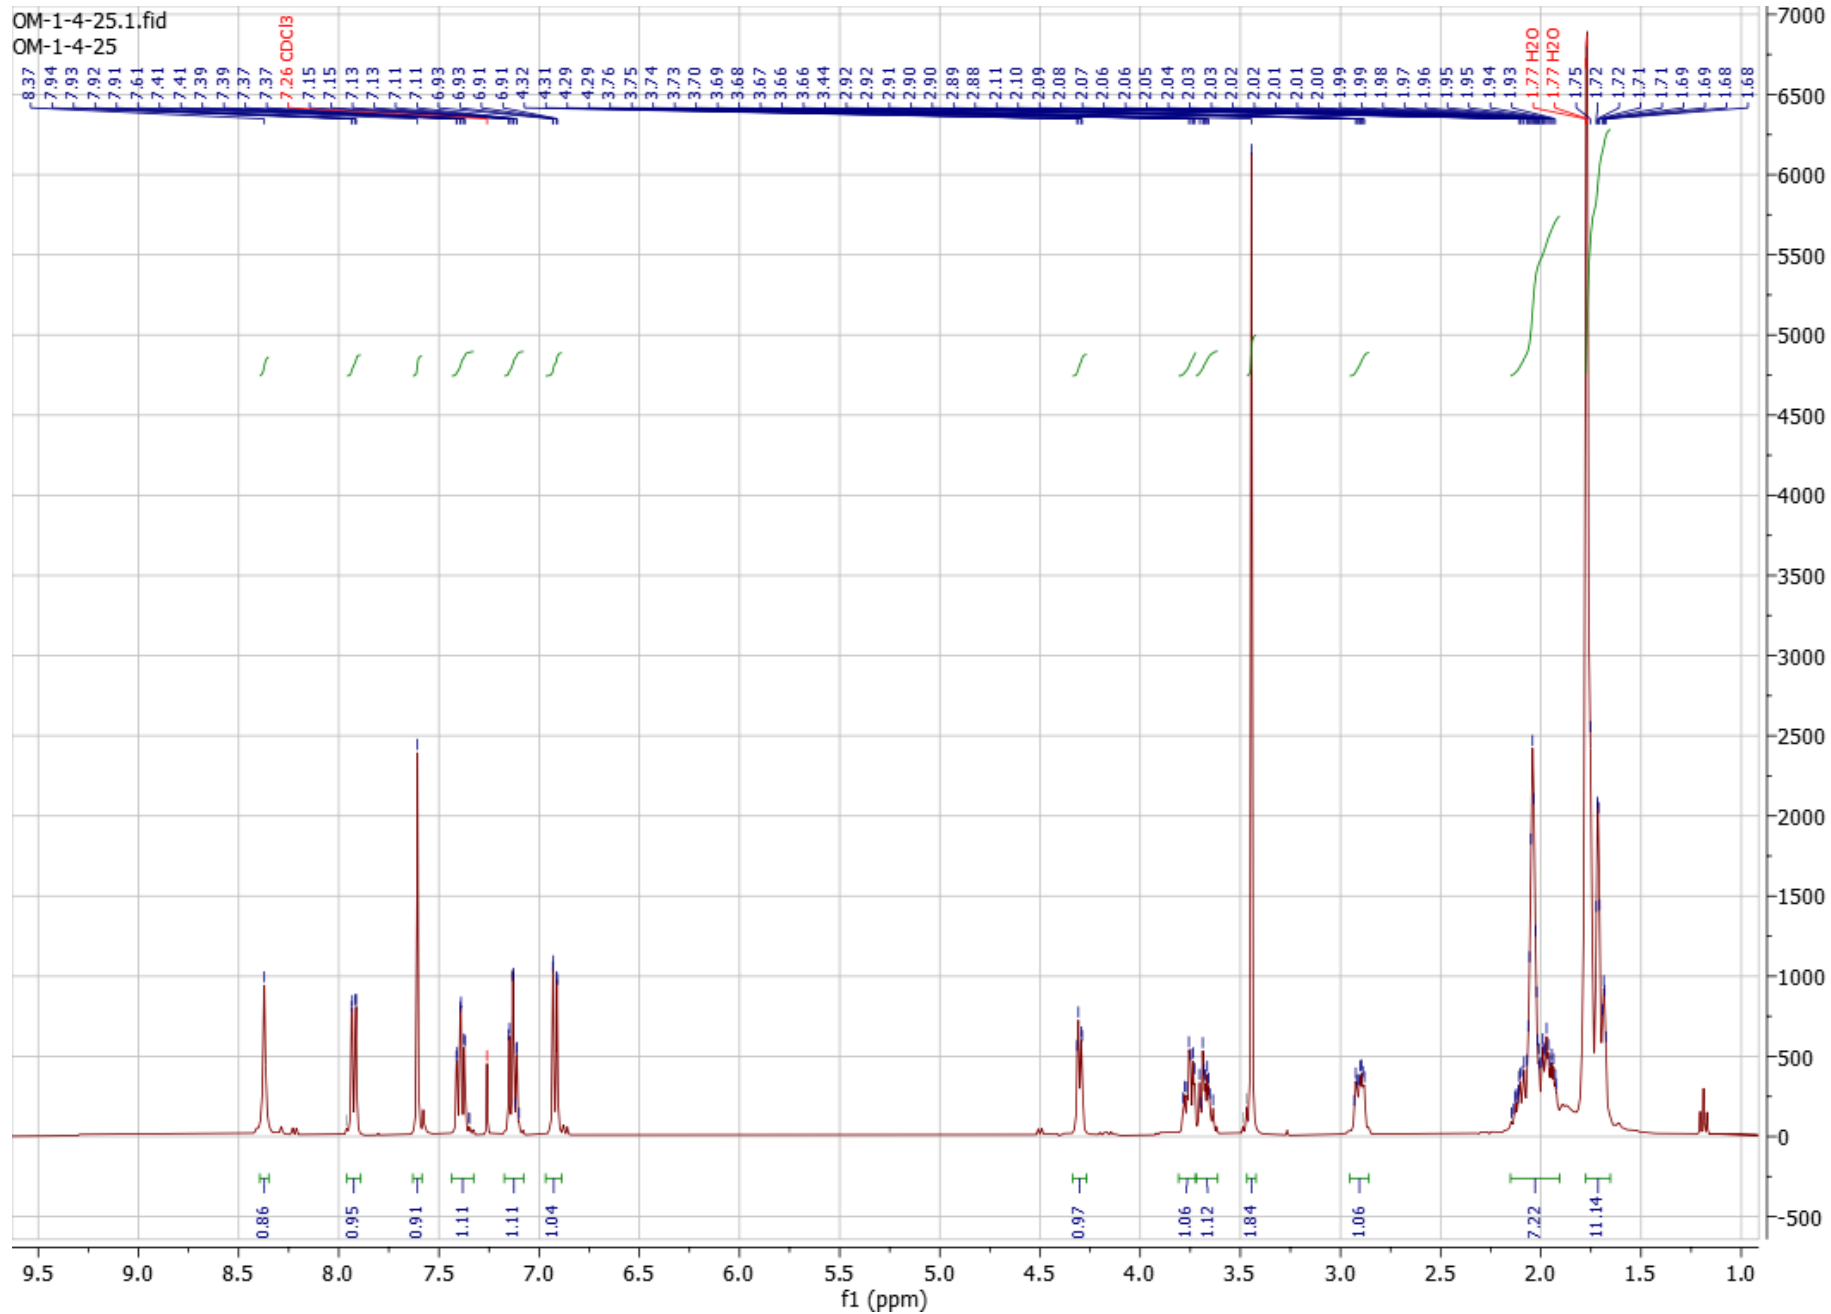

SI33:  $^1\text{H}$  NMR spectrum of 4q [400 MHz, DMSO- $d_6$ ]

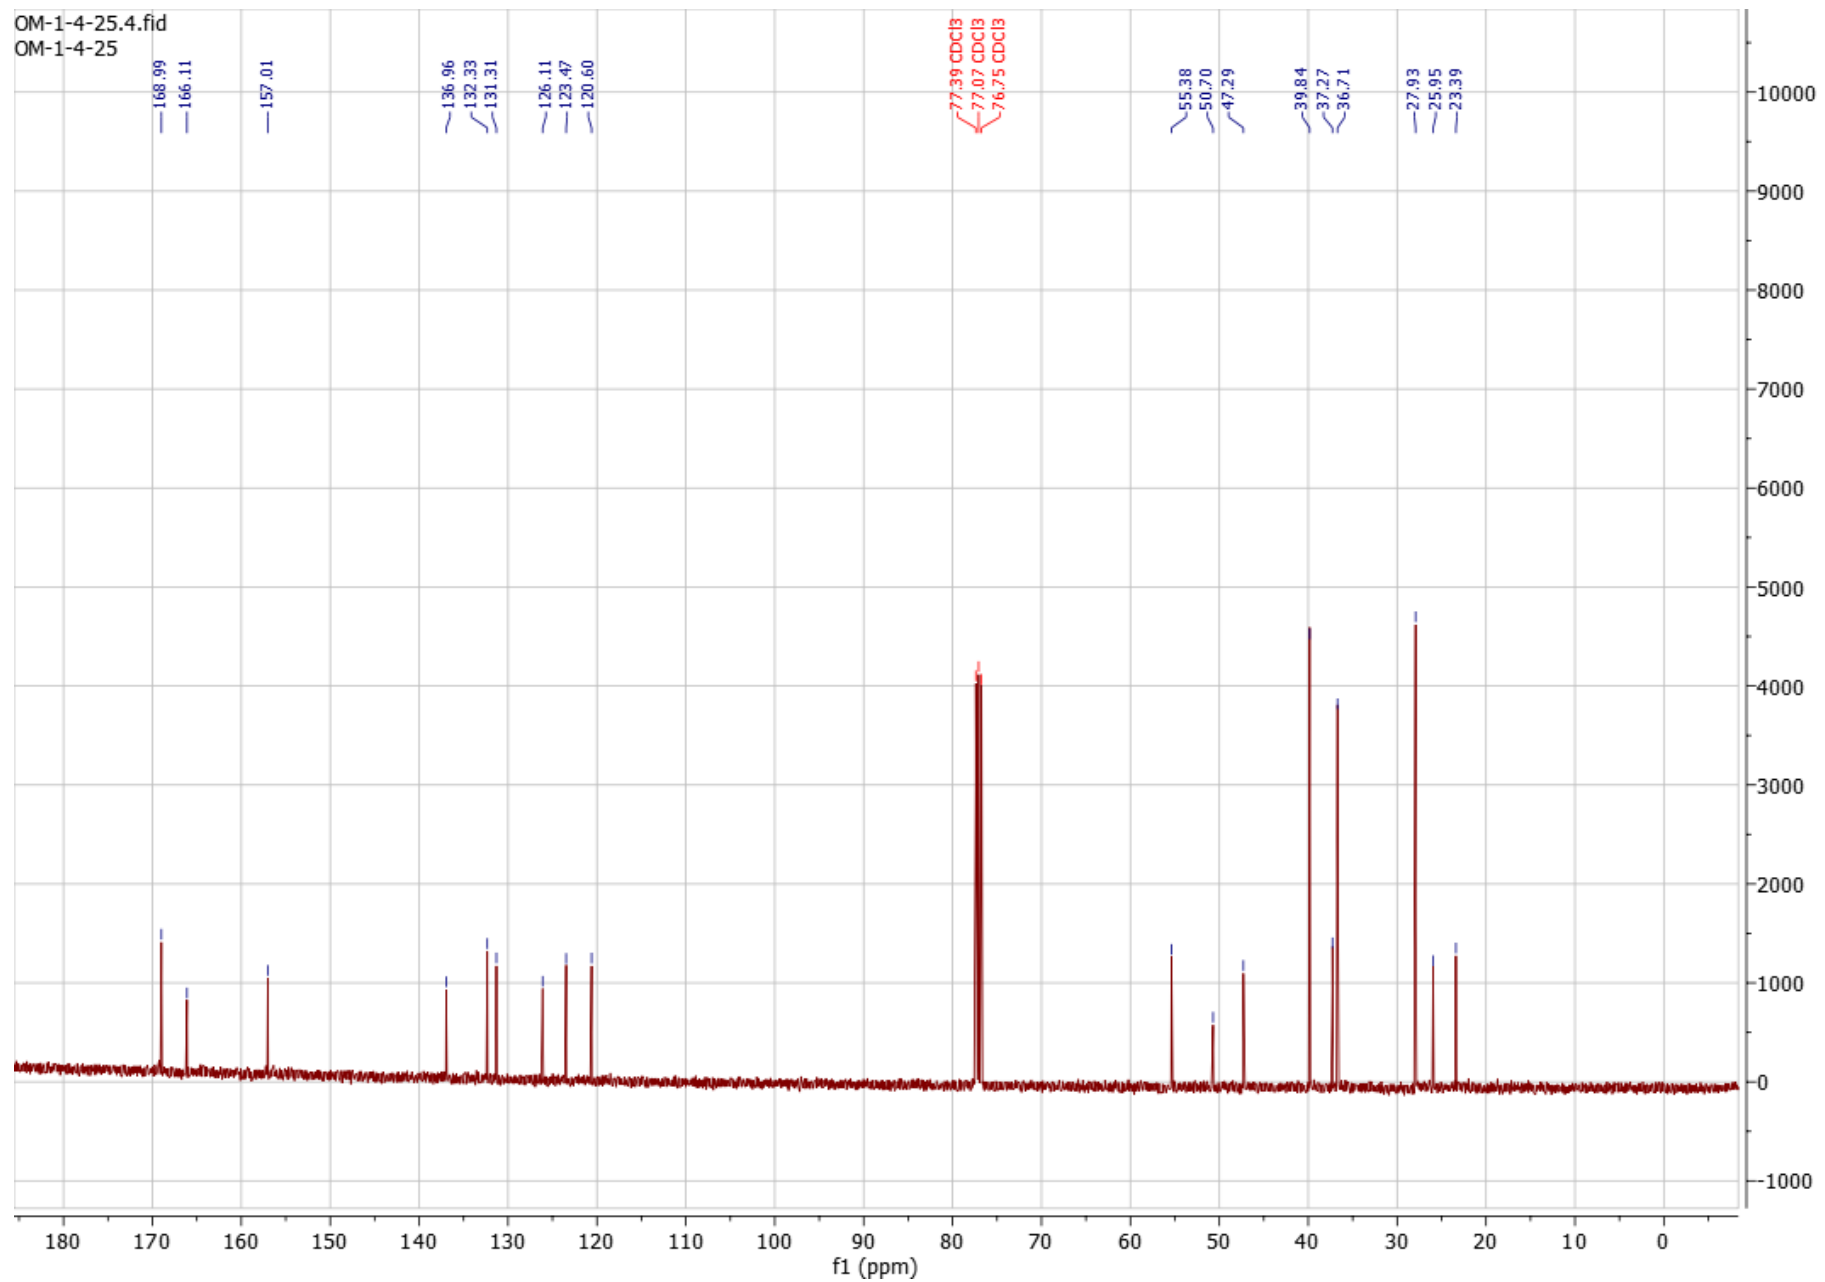

**SI34:**  $^{13}\text{C}$  NMR spectrum of 4q [100 MHz, DMSO-*d*6]

OM-1-4-25.3.fid  
OM-1-4-25

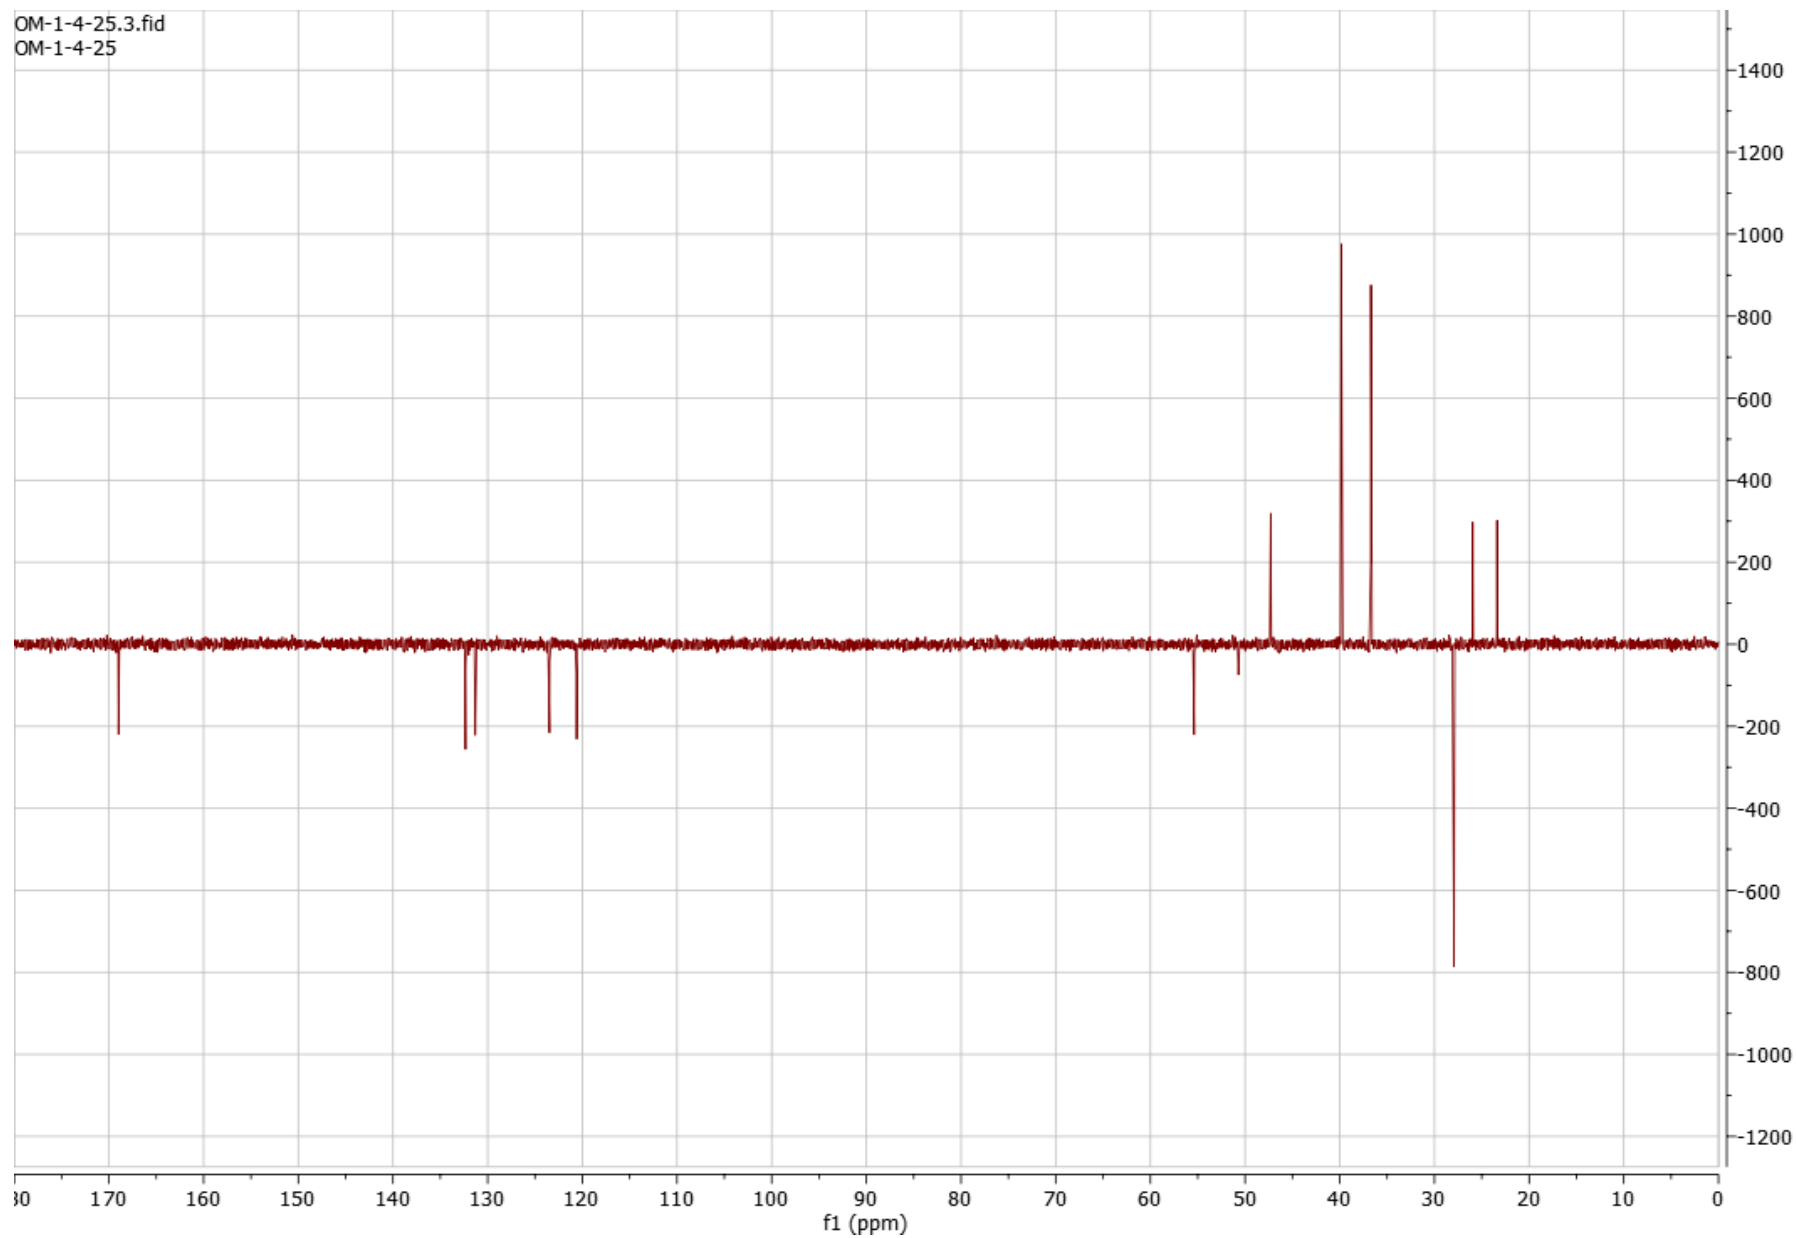

**SI35:** Dept-135 spectrum of 4q [100 MHz, DMSO-*d*6]

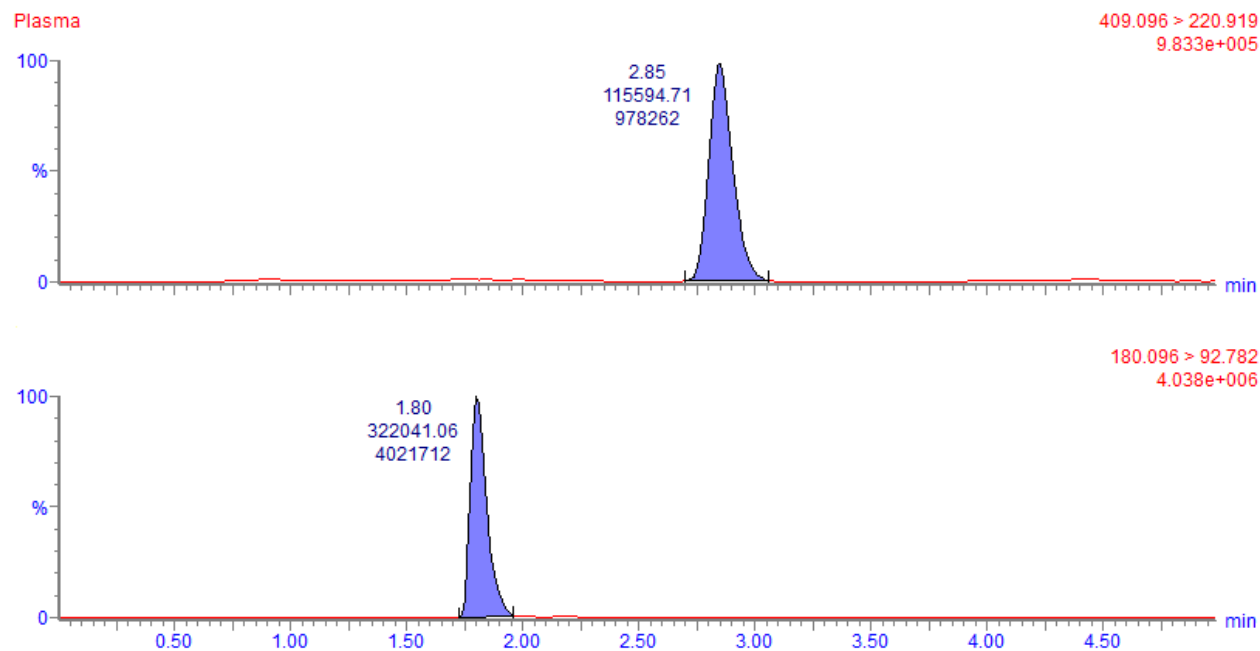

**SI36:** Typical MRM chromatograms of **4k** (top panel) and the IS (below panel) at 0.5 h plasma pharmacokinetic study sample

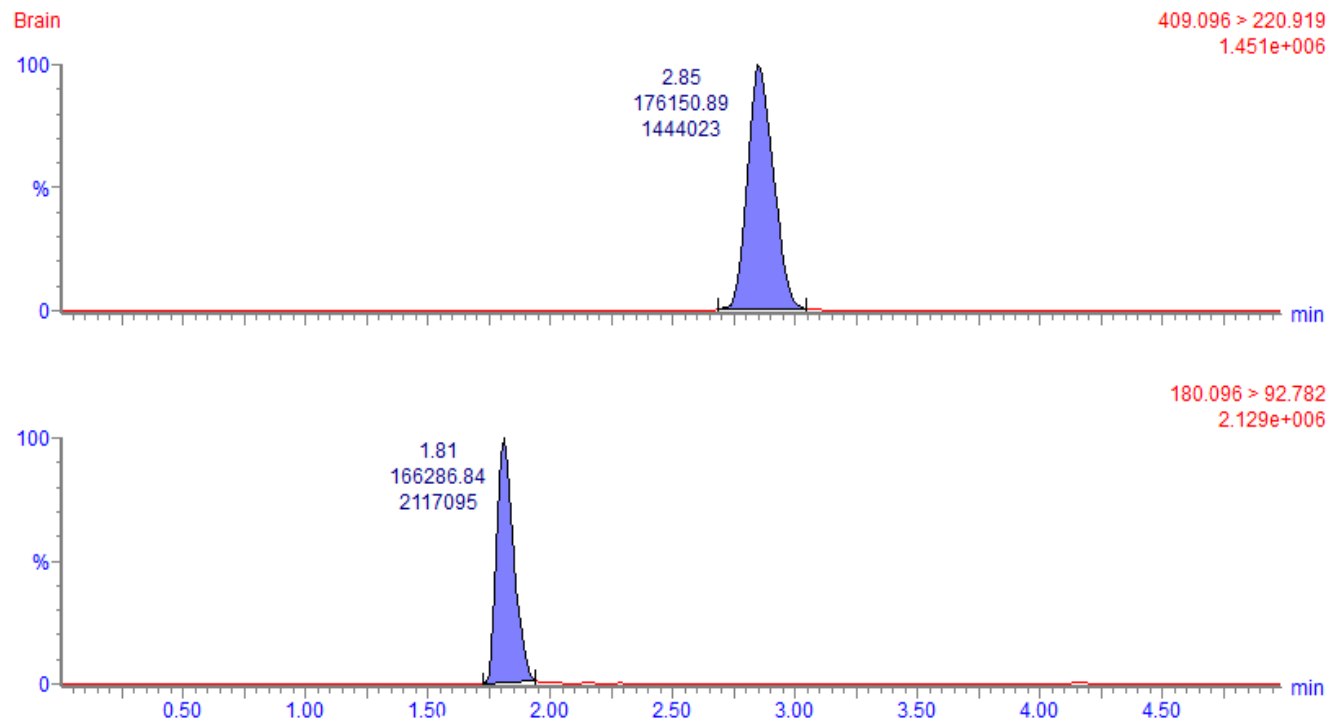

**SI37:** Typical MRM chromatograms of **4k** (top panel) and the IS (below panel) at 0.5 h brain pharmacokinetic study sample



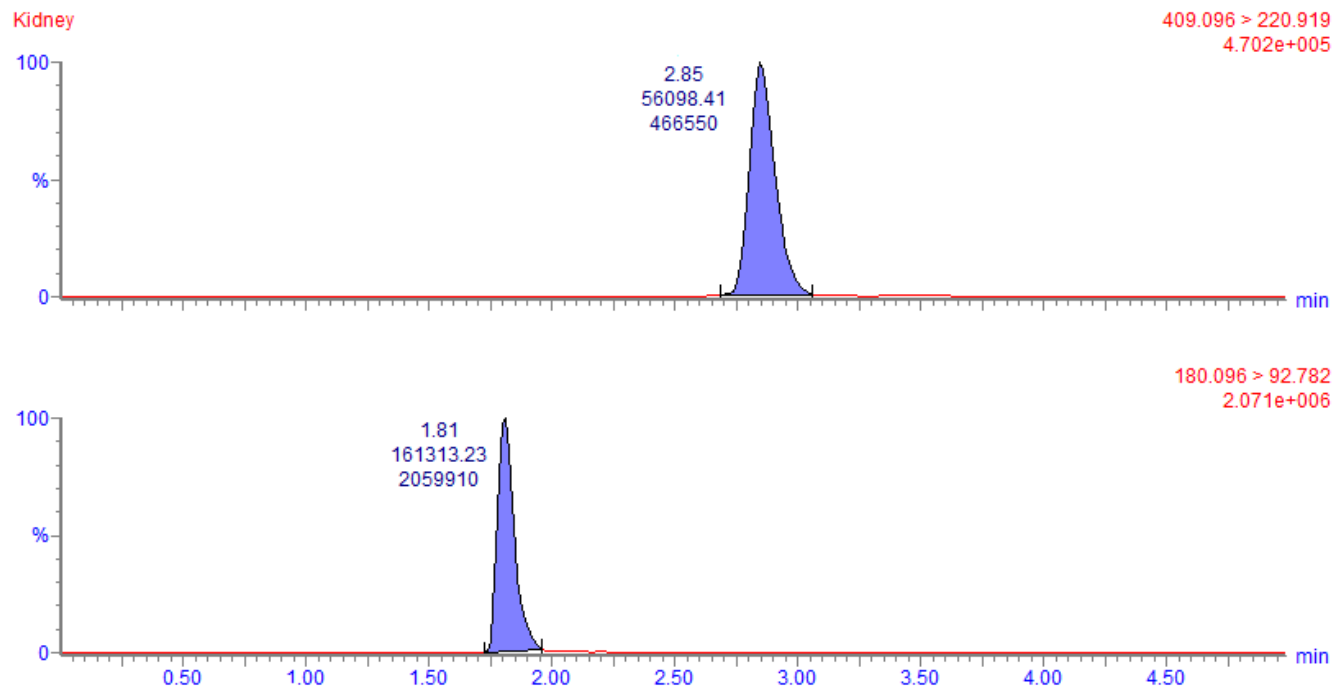

**SI38:** Typical MRM chromatograms of **4k** (top panel) and the IS (below panel) at 0.5 h kidney pharmacokinetic study sample

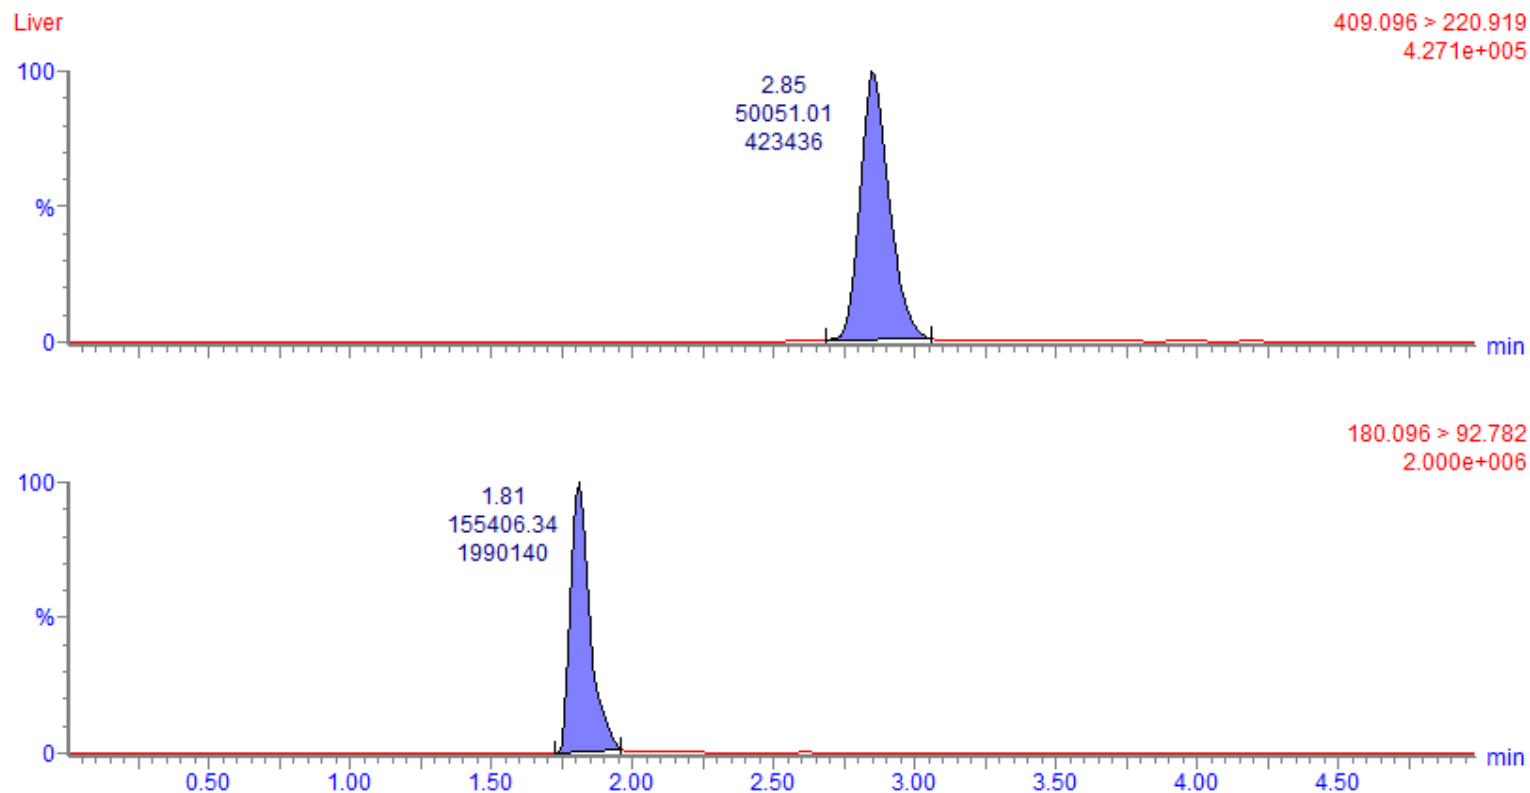

**SI39:** Typical MRM chromatograms of **4k** (top panel) and the IS (below panel) at 0.5 h liver pharmacokinetic study sample
